# Supplementary material for: Continuous Fuzzy Kano Model and Fuzzy AHP Model for Aesthetic Product Design: Case Study of an Electric Scooter
Source: Hindawi journal article supplement (doi:10.1155/2018/4162539), 2018-09-20

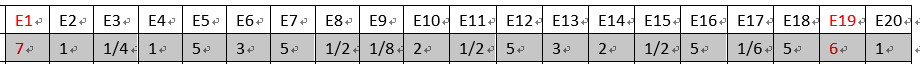


Let us consider a problem with a given alternative and criterion using the opinions of 20 experts. The opinion data is given as a triangular fuzzy number as follows:

R1 --(6, 7, 8), R2 -- (1/2, 1, 2), R3 -- (1/5, 1/4, 1/3), R4 -- (1/2, 1, 2), R5 -- (4, 5, 6)R6 -- (2, 3, 4),R7 -- (4, 5, 6)

R8 -- (1/3 , 1/2, 1), R9 -- (1/9, 1/8, 1/7), R10 -- (1, 2, 3)

R11 -- (1/3 , 1/2, 1)R12 -- (4, 5, 6)R13 -- (2, 3, 4)R14 -- (1, 2, 3)R15 -- (1/3 , 1/2, 1)R16 -- (4, 5, 6)R17 -- (1/7, 1/6, 1/5) R18 -- (4, 5, 6), R19 -- (5, 6, 7), R20 -- (1/2, 1, 2)

Then we consider two cases:

1.Do not consider the degree of importance of each expert; i.e.
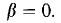


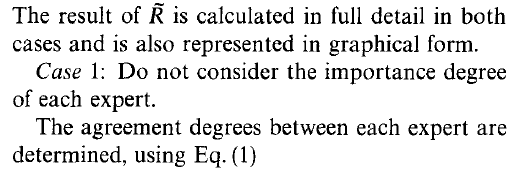


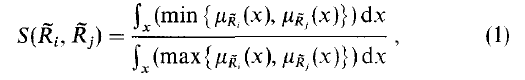


For example, the opinion of the first expert is the fuzzy number 7, the opinion of the 19th expert is the fuzzy number 6, Then the similarity between the two experts is 0.1429.


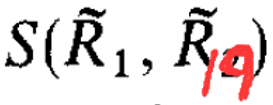
 =0.1429

Repeat the comparison of the two experts' opinions on the same question, the author can get the following result, but this process needs to be calculated by MATLAB. The screenshot below is the result of MATLAB calculation, which is the recognition matrix of 20 experts on the same problem.

The agreement matrix is represented by AM :


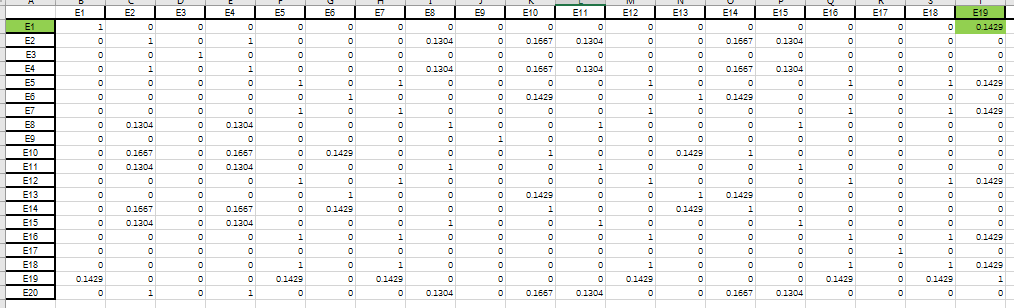


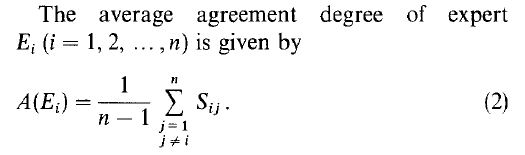


The average agreement degrees of the experts. First, the sum of the numbers of each row of the matrix,


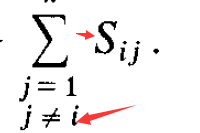
,Because *j* is not equal to *i*. So, after each line is summed, subtract 1.

There are 20 experts, n= 20, n-1=20-1=19. for example: *A*(*E*1) = 0.007521,

SUM=0.1429+1-1=0.1429

*A*(*E*1)= 0.1429/19=0.007521

The screenshot below is the result of A(E) calculation.


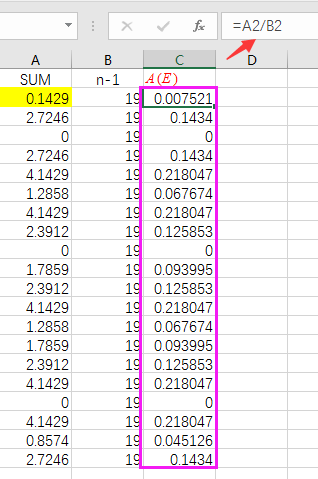


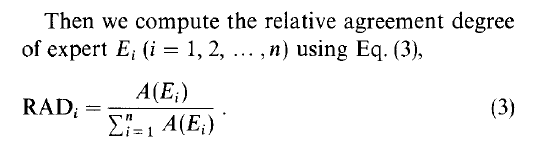


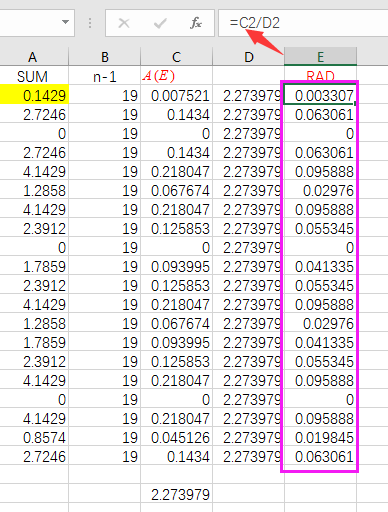


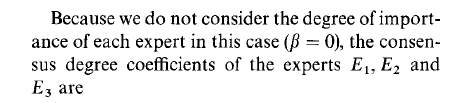


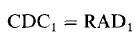


The "overall" fuzzy number of combining experts' opinions is:


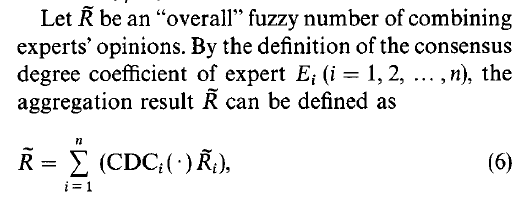


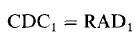


RAD is multiplied by the value of the triangular fuzzy number

|  | RAD | L | RAD * L | M | RAD * M | R | RAD * R |
| --- | --- | --- | --- | --- | --- | --- | --- |
| E1 | 0.0033 | 6 | 0.0198 | 7 | 0.0232 | 8 | 0.0265 |
| E2 | 0.0631 | 0.5 | 0.0315 | 1 | 0.0631 | 2 | 0.1261 |
| E3 | 0.0000 | 0.2 | 0.0000 | 1/4(0.25) | 0.0000 | 0.333333 | 0.0000 |
| E4 | 0.0631 | 0.5 | 0.0315 | 1 | 0.0631 | 2 | 0.1261 |
| E5 | 0.0959 | 4 | 0.3836 | 5 | 0.4794 | 6 | 0.5753 |
| E6 | 0.0298 | 2 | 0.0595 | 3 | 0.0893 | 4 | 0.1190 |
| E7 | 0.0959 | 4 | 0.3836 | 5 | 0.4794 | 6 | 0.5753 |
| E8 | 0.0553 | 0.333333 | 0.0184 | 1/2(0.5) | 0.0277 | 1 | 0.0553 |
| E9 | 0.0000 | 0.111111 | 0.0000 | 1/8(0.125) | 0.0000 | 0.142857 | 0.0000 |
| E10 | 0.0413 | 1 | 0.0413 | 2 | 0.0827 | 3 | 0.1240 |
| E11 | 0.0553 | 0.333333 | 0.0184 | 1/2(0.5) | 0.0277 | 1 | 0.0553 |
| E12 | 0.0959 | 4 | 0.3836 | 5 | 0.4794 | 6 | 0.5753 |
| E13 | 0.0298 | 2 | 0.0595 | 3 | 0.0893 | 4 | 0.1190 |
| E14 | 0.0413 | 1 | 0.0413 | 2 | 0.0827 | 3 | 0.1240 |
| E15 | 0.0553 | 0.333333 | 0.0184 | 1/2(0.5) | 0.0277 | 1 | 0.0553 |
| E16 | 0.0959 | 4 | 0.3836 | 5 | 0.4794 | 6 | 0.5753 |
| E17 | 0.0000 | 0.142857 | 0.0000 | 1/6(0.166667) | 0.0000 | 0.2 | 0.0000 |
| E18 | 0.0959 | 4 | 0.3836 | 5 | 0.4794 | 6 | 0.5753 |
| E19 | 0.0198 | 5 | 0.0992 | 6 | 0.1191 | 7 | 0.1389 |
| E20 | 0.0631 | 0.5 | 0.0315 | 1 | 0.0631 | 2 | 0.1261 |
|  |  |  | 2.3885  (This column of summation) |  | 3.1555  (This column of summation) |  | 4.0725  (This column of summation) |


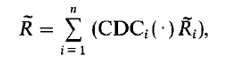


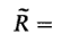
(2.3885, 3.1555, 4.0725)

This calculation result is used to construct a FAHP pairwise comparison matrix.


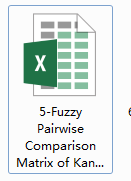

Supplement: f1 [file 4162539.f1.zip › New supplementary documentation/SAM/SAM-Description of Equation 1-6.docx]
