# Supplementary material for: Continuous Fuzzy Kano Model and Fuzzy AHP Model for Aesthetic Product Design: Case Study of an Electric Scooter
Source: Hindawi journal article supplement (doi:10.1155/2018/4162539), 2018-09-20

|  | E1 | E2 | E3 | E4 | E5 | E6 | E7 | E8 | E9 | E10 | E11 | E12 | E13 | E14 | E15 | E16 | E17 | E18 | E19 | E20 |
| --- | --- | --- | --- | --- | --- | --- | --- | --- | --- | --- | --- | --- | --- | --- | --- | --- | --- | --- | --- | --- |
| 1 | 7 | 1 | 1/4 | 1 | 5 | 3 | 5 | 1/2 | 1/8 | 2 | 1/2 | 5 | 3 | 2 | 1/2 | 5 | 1/6 | 5 | 6 | 1 |
| 2 | 1/5 | 1 | 2 | 6 | 1/3 | 4 | 4 | 1/3 | 1/8 | 1 | 2 | 1 | 2 | 3 | 2 | 4 | 3 | 1 | 1/8 | 1/4 |
| 3 | 1/3 | 5 | 1/3 | 5 | 3 | 5 | 6 | 2 | 6 | 4 | 3 | 1 | 1 | 1/2 | 1/3 | 4 | 4 | 3 | 1/6 | 1/6 |
| 4 | 1 | 6 | 1/4 | 3 | 1/4 | 1/5 | 7 | 2 | 1/8 | 1 | 3 | 4 | 2 | 1/6 | 1/3 | 6 | 5 | 4 | 1/3 | 4 |
| 5 | 2 | 9 | 3 | 3 | 1/4 | 2 | 7 | 4 | 5 | 6 | 1/4 | 1/6 | 3 | 1/7 | 3 | 2 | 3 | 2 | 1/8 | 1 |
| 6 | 5 | 9 | 3 | 7 | 4 | 3 | 7 | 1 | 6 | 5 | 1 | 6 | 4 | 3 | 3 | 7 | 3 | 4 | 6 | 5 |
| 7 | 4 | 9 | 1 | 7 | 3 | 5 | 7 | 1/3 | 7 | 5 | 2 | 9 | 3 | 2 | 4 | 6 | 3 | 6 | 9 | 5 |
| 8 | 1/4 | 1 | 2 | 3 | 1/3 | 4 | 1/2 | 1/2 | 8 | 1 | 1 | 1/5 | 1/2 | 1 | 4 | 5 | 3 | 1 | 1/6 | 1/4 |
| 9 | 1/2 | 3 | 1 | 5 | 1/5 | 1/3 | 1/2 | 4 | 8 | 2 | 3 | 1/7 | 1/3 | 1/6 | 1/3 | 2 | 4 | 4 | 1/2 | 1/4 |
| 10 | 1/3 | 1/3 | 1 | 2 | 4 | 1/5 | 1/4 | 2 | 1/8 | 1/3 | 4 | 1 | 1/2 | 1/5 | 1/3 | 2 | 4 | 3 | 1/5 | 3 |
| 11 | 5 | 5 | 4 | 3 | 1/4 | 1 | 3 | 2 | 6 | 4 | 1/5 | 1/9 | 3 | 1/6 | 1/2 | 1/6 | 3 | 2 | 1/8 | 1 |
| 12 | 4 | 2 | 5 | 6 | 3 | 3 | 2 | 2 | 6 | 4 | 1 | 1 | 4 | 4 | 1 | 5 | 3 | 3 | 3 | 4 |
| 13 | 1/3 | 3 | 1/2 | 3 | 1/3 | 3 | 1/2 | 1/3 | 6 | 3 | 4 | 4 | 1 | 2 | 4 | 5 | 4 | 7 | 8 | 4 |
| 14 | 1/2 | 1 | 1 | 2 | 4 | 1/4 | 1/2 | 1/4 | 1/7 | 3 | 3 | 1/6 | 1/3 | 1/4 | 1/4 | 1 | 4 | 5 | 4 | 1/4 |
| 15 | 3 | 1 | 1/2 | 1/4 | 3 | 1/6 | 1/4 | 1/3 | 1/7 | 1 | 4 | 1/3 | 1 | 1/3 | 1/3 | 1 | 3 | 2 | 1 | 4 |
| 16 | 4 | 1/2 | 2 | 1/3 | 2 | 1/2 | 4 | 3 | 1/5 | 5 | 1/3 | 1/9 | 3 | 1/2 | 1/3 | 1/5 | 2 | 1/6 | 1/4 | 3 |
| 17 | 4 | 3 | 3 | 2 | 2 | 2 | 3 | 2 | 6 | 5 | 2 | 6 | 4 | 1 | 1/3 | 4 | 2 | 3 | 5 | 4 |
| 18 | 1 | 5 | 2 | 3 | 3 | 2 | 4 | 1 | 6 | 6 | 3 | 8 | 2 | 2 | 3 | 2 | 3 | 8 | 8 | 4 |
| 19 | 3 | 1/2 | 1/3 | 1/5 | 1/3 | 1/6 | 1/4 | 3 | 1/8 | 1/3 | 3 | 8 | 3 | 3 | 1/2 | 5 | 3 | 2 | 1 | 5 |
| 20 | 2 | 1 | 4 | 1/2 | 4 | 2 | 5 | 4 | 5 | 3 | 1/4 | 1/9 | 3 | 1/3 | 4 | 1/2 | 1 | 1/5 | 1/3 | 4 |
| 21 | 2 | 5 | 2 | 3 | 1/3 | 3 | 4 | 2 | 6 | 3 | 1/2 | 4 | 4 | 5 |  | 4 | 1/3 | 1/6 | 6 | 5 |
| 22 | 1/3 | 4 | 1 | 1 | 4 | 3 | 6 | 1 | 4 | 4 | 2 | 7 | 3 | 8 | 5 | 6 | 3 | 4 | 7 | 5 |
| 23 | 4 | 7 | 4 | 4 | 4 | 5 | 5 | 4 | 7 | 6 | 1/6 | 1 | 2 | 1/2 | 4 | 1/2 | 1/3 | 1/5 | 2 | 1/5 |
| 24 | 2 | 7 | 5 | 5 | 1/3 | 6 | 4 | 3 | 7 | 5 | 2 | 5 | 4 | 5 | 2 | 3 | 1/4 | 1/4 | 1/3 | 1 |
| 25 | 1/2 | 6 | 2 | 5 | 4 | 6 | 4 | 2 | 6 | 5 | 4 | 6 | 3 | 3 | 4 | 2 | 3 | 6 | 9 | 1 |
| 26 | 4 | 8 | 1/2 | 3 | 1/3 | 3 | 1/2 | 1/4 | 5 | 3 | 5 | 7 | 1 | 3 | 1/2 | 6 | 2 | 4 | 1 | 4 |
| 27 | 2 | 9 | 1/3 | 3 | 1/3 | 3 | 2 | 1/4 | 6 | 1 | 5 | 9 | 1 | 6 | 3 | 7 | 3 | 8 | 9 | 4 |
| 28 | 1/3 | 1/7 | 1/4 | 1 | 1/3 | 2 | 2 | 1/2 | 3 | 1/3 | 7 | 4 | 1/2 | 2 | 3 | 1/2 | 4 | 7 | 7 | 1 |

File description:

The following is a total of 28 questions, corresponding to the answers of 20 experts. E1 is an abbreviation for expert 1, The fuzzy number 7 is the opinion of expert 1 on the comparison of the first group of perceptual vocabularies.

This is the data used in the paper to calculate the data. Each row in the table is the value given by the expert under investigation. The calculated program code is based on the mathematical formula in the paper. For example, the following row of data is input to MATLAB.

| 7 | 1 | 1/4 | 1 | 5 | 3 | 5 | 1/2 | 1/8 | 2 | 1/2 | 5 | 3 | 2 | 1/2 | 5 | 1/6 | 5 | 6 | 1 |
| --- | --- | --- | --- | --- | --- | --- | --- | --- | --- | --- | --- | --- | --- | --- | --- | --- | --- | --- | --- |

In the software work area, a new variable A form is created, and one line of data is pasted into A. After the code is calculated, the researcher can obtain the results of the form in the script. This saves the time for the development of industrial products without manual calculation.

The following is a total of 28 questions, corresponding to the answers of 20 experts.

Each row in the table is the value given by the expert under investigation. The calculated program code is based on the mathematical formula in the paper. For example, the following row of data is input to MATLAB.

| 7 | 1 | 1/4 | 1 | 5 | 3 | 5 | 1/2 | 1/8 | 2 | 1/2 | 5 | 3 | 2 | 1/2 | 5 | 1/6 | 5 | 6 | 1 |
| --- | --- | --- | --- | --- | --- | --- | --- | --- | --- | --- | --- | --- | --- | --- | --- | --- | --- | --- | --- |


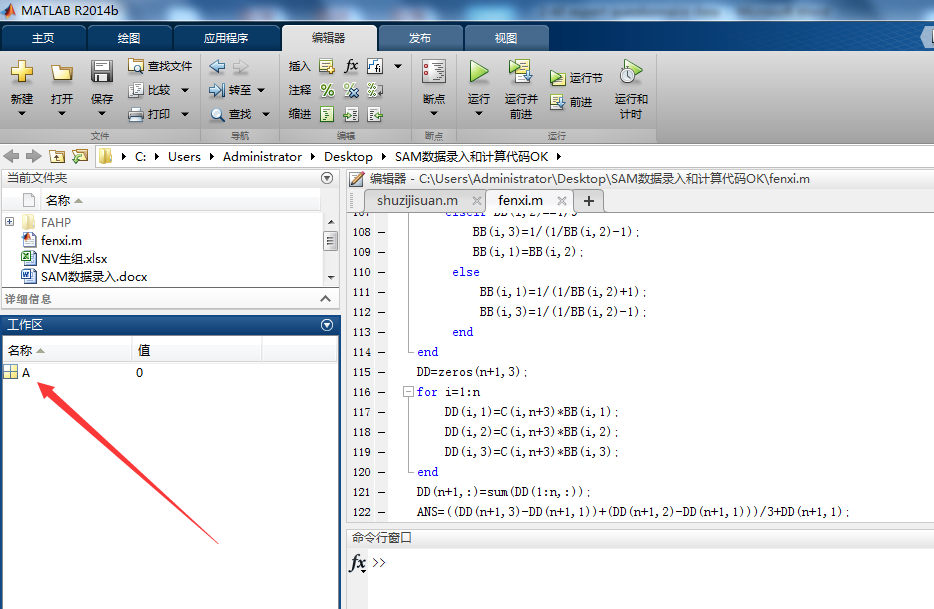


In the software work area, a new variable A form is created, and one line of data is pasted into A.

| 7 | 1 | 1/4 | 1 | 5 | 3 | 5 | 1/2 | 1/8 | 2 | 1/2 | 5 | 3 | 2 | 1/2 | 5 | 1/6 | 5 | 6 | 1 |
| --- | --- | --- | --- | --- | --- | --- | --- | --- | --- | --- | --- | --- | --- | --- | --- | --- | --- | --- | --- |


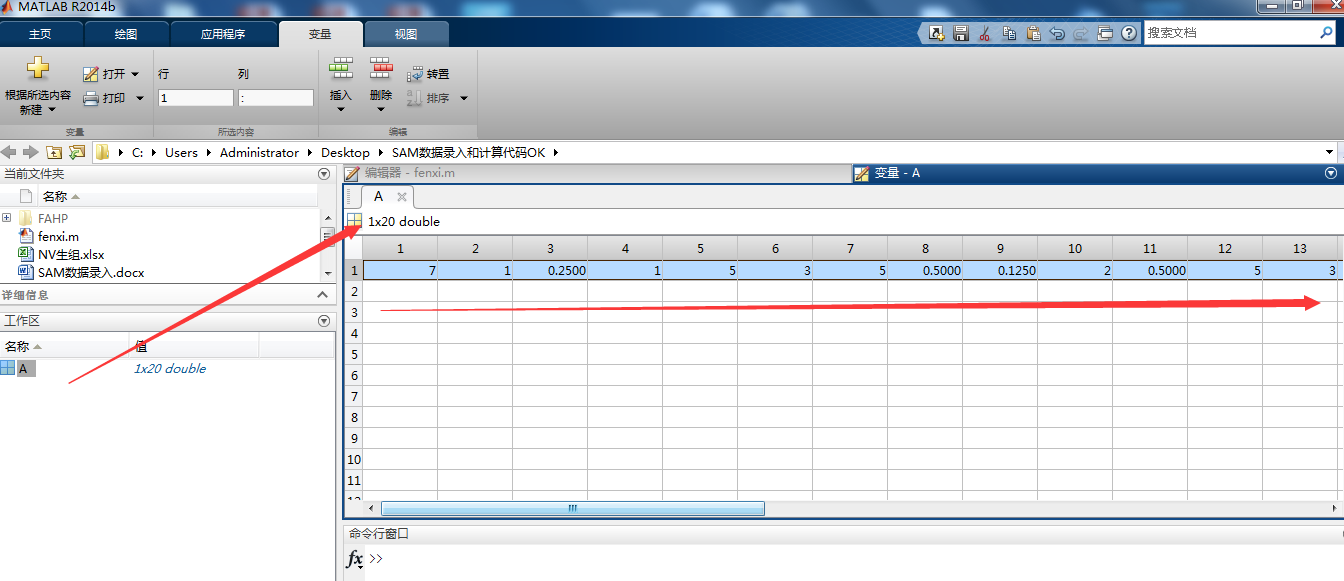


After the code is calculated, the researcher can obtain the results of the form in the script. This saves the time for the development of industrial products without manual calculation.


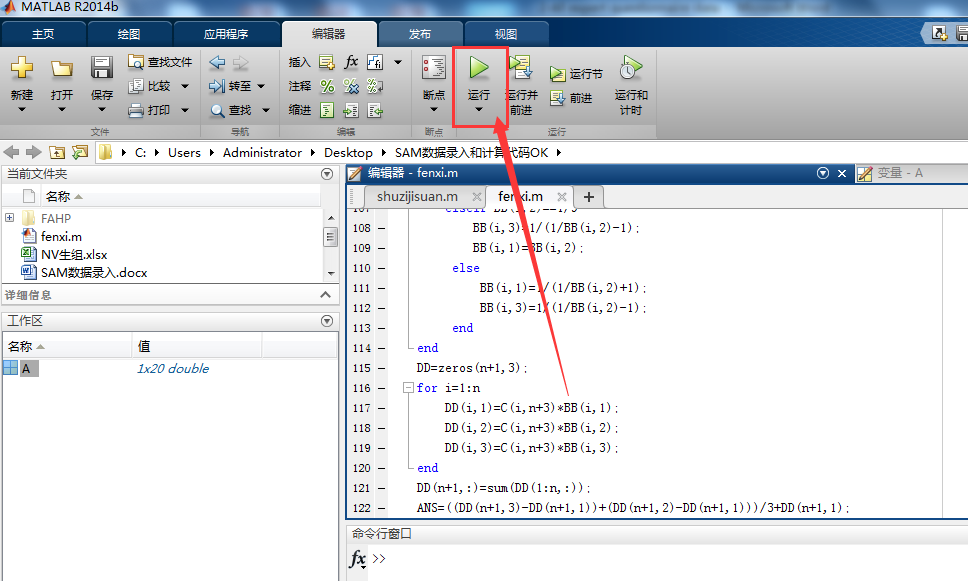


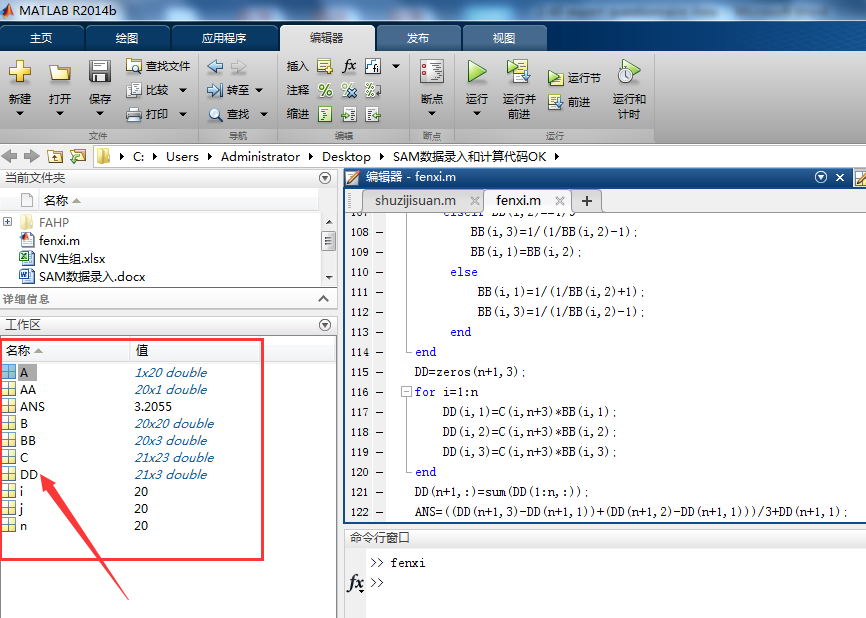


Double-click DD to open the form


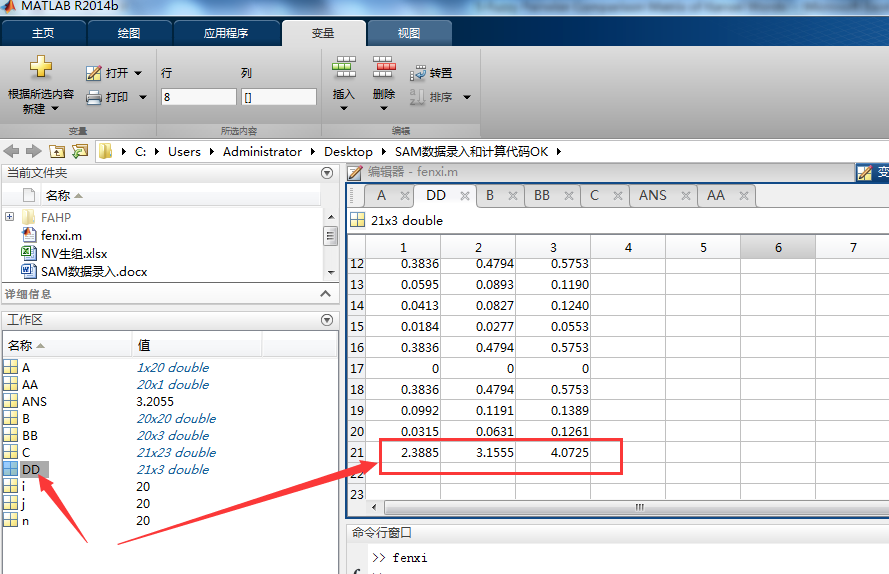


Combine the results of the calculation into the following table, This is the result of the comparison of the first group of perceptual vocabularies.


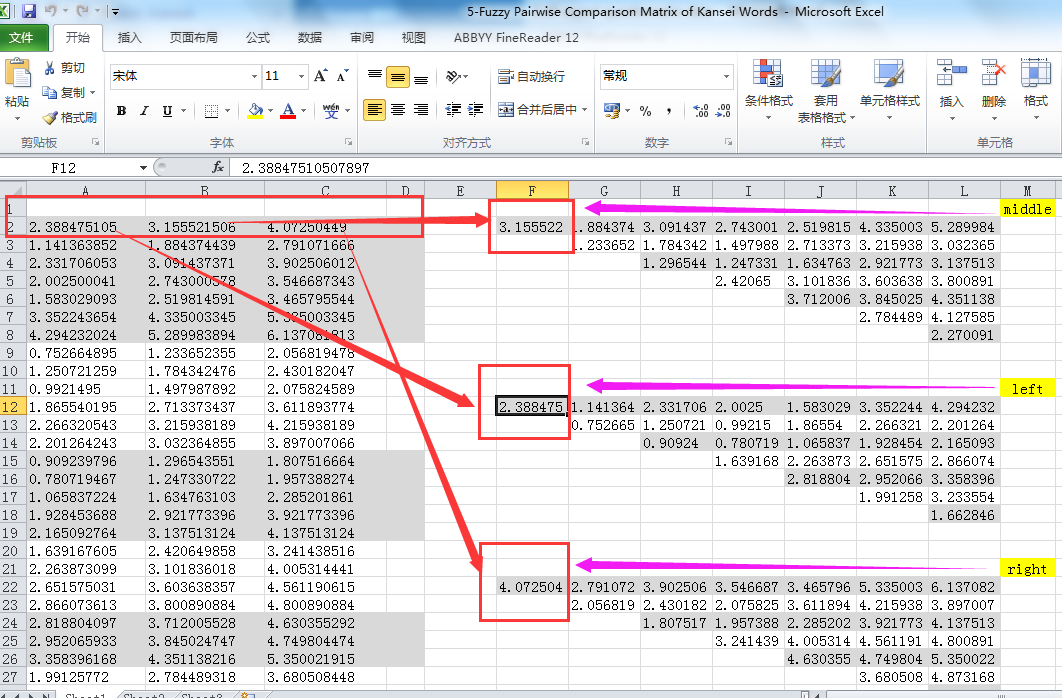


Repeated calculations above can calculate the recognition of 20 experts for the comparison of 28 pairs of perceptual vocabularies.

The following screenshot is the mathematical formula in the corresponding paper

4-The program code used to calculate，this text is the code of the calculation process, please see 4-The program code used to calculate.

The following screenshot is the mathematical formula 1 to 6 in the paper. The calculation code is based on these 6 formulas. Please see


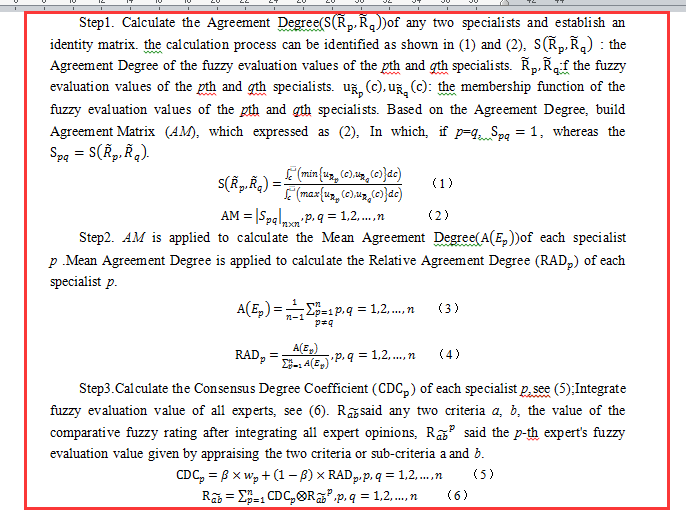

Supplement: f1 [file 4162539.f1.zip › Supplementary materials/2. SAM+FAHP/2-All expert questionnaire data.docx]
