# Supplementary material for: Continuous Fuzzy Kano Model and Fuzzy AHP Model for Aesthetic Product Design: Case Study of an Electric Scooter
Source: Hindawi journal article supplement (doi:10.1155/2018/4162539), 2018-09-20

Mathematical formulae in the paper:
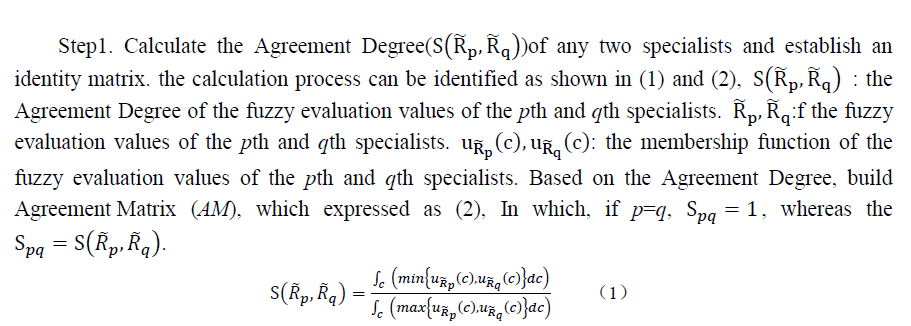


In the paper, this formula can be used to calculate the similar intersection of two experts' views on a group of perceptual words, such as the following two fuzzy numbers, the reciprocal of the fuzzy number 8 and the reciprocal of the fuzzy number 9.

Convert the mathematical formula in the text into a calculation code:

A=[1/7,1/8,1/9];

B=[1/8,1/9,1/9];

output=(A(3)-B(1))^2/((A(3)-A(1)+B(3)-B(1))*(B(2)-B(1)+A(3)-A(2))-(A(3)-B(1))^2)


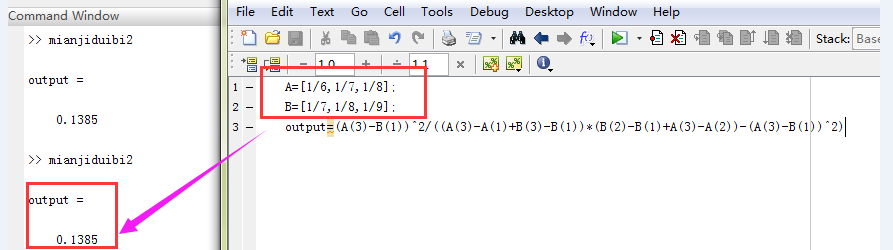


The number 0.1385 is the result of the calculation

| Fuzzy number | | Semantic value |
| --- | --- | --- |
|  | （1,1,2） | of equal importance |
|  | （1,2,3） | Between the same important and slightly important |
|  | （2,3,4） | Slightly important |
|  | （3,4,5） | Between the slightly important and quite important |
|  | （4,5,6） | important |
|  | （5,6,7） | Between important and very important |
|  | （6,7,8） | More important |
|  | （7,8,9） | Between the more important and very important |
|  | （8,9,9） | Extremely important |

Mathematical Formulas Using MATLAB to Calculate Processes, The following content, please check the folder“3-Similarity Aggregation Method (SAM)” This document is the result of the calculation of all fuzzy numbers and represents all possible outcomes of any two expert opinions.


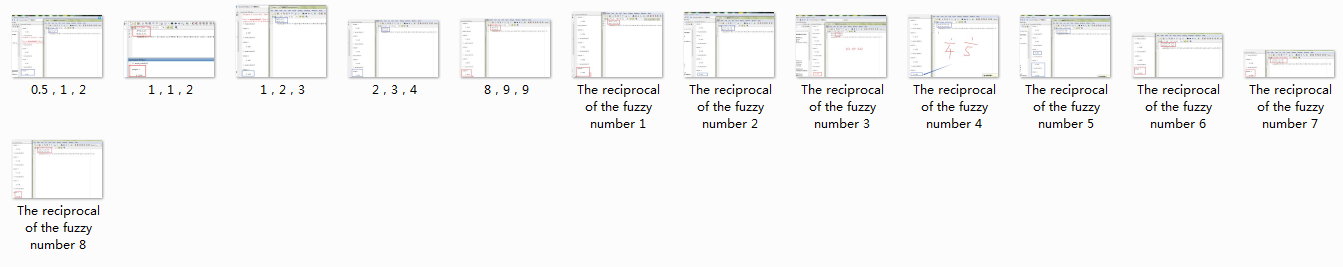


For example, the fuzzy number in the following table, which is the answer of 20 experts to a group of emotional words. The 20 fuzzy numbers are calculated with each other, representing the degree of recognition among 20 experts.

| 7 | 1 | 1/4 | 1 | 5 | 3 | 5 | 1/2 | 1/8 | 2 | 1/2 | 5 | 3 | 2 | 1/2 | 5 | 1/6 | 5 | 6 | 1 |
| --- | --- | --- | --- | --- | --- | --- | --- | --- | --- | --- | --- | --- | --- | --- | --- | --- | --- | --- | --- |

But manual calculation is a waste of time, so the author continues to write code，Please see the following explanatory text.


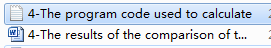

Supplement: f1 [file 4162539.f1.zip › Supplementary materials/2. SAM+FAHP/3-Similarity Aggregation Method (SAM).docx]
