# Supplementary material for: Continuous Fuzzy Kano Model and Fuzzy AHP Model for Aesthetic Product Design: Case Study of an Electric Scooter
Source: Hindawi journal article supplement (doi:10.1155/2018/4162539), 2018-09-20

This text is used to write code for the calculation process.

The results of the comparison of two expert opinions within the matrix:

When an expert's choice is a fuzzy number 1, another expert's choice is a fuzzy number 2.，So, the similarity between their two people's opinions is 0.1667. otherwise 0

When an expert's choice is a fuzzy number 2, another expert's choice is a fuzzy number 3.，So, the similarity between their two people's opinions is 0.1429 otherwise 0

When an expert's choice is a fuzzy number 3, another expert's choice is a fuzzy number 4.，So, the similarity between their two people's opinions is 0.1429 otherwise 0

When an expert's choice is a fuzzy number 4, another expert's choice is a fuzzy number 5.，So, the similarity between their two people's opinions is 0.1429 otherwise 0

When an expert's choice is a fuzzy number 5, another expert's choice is a fuzzy number 6.，So, the similarity between their two people's opinions is 0.1429 otherwise 0

When an expert's choice is a fuzzy number 6, another expert's choice is a fuzzy number 7.，So, the similarity between their two people's opinions is 0.1429 otherwise 0

When an expert's choice is a fuzzy number 7, another expert's choice is a fuzzy number 8.，So, the similarity between their two people's opinions is 0.1429 otherwise 0

When an expert's choice is a fuzzy number 8, another expert's choice is a fuzzy number 9.，So, the similarity between their two people's opinions is 0.2 otherwise 0

When an expert's choice is a fuzzy number 1, another expert's choice is a fuzzy number 1/2.，So, the similarity between their two people's opinions is 0.1304 otherwise 0

When an expert's choice is a fuzzy number 1/2, another expert's choice is a fuzzy number 1/3.，So, the similarity between their two people's opinions is 0.1 otherwise 0

When an expert's choice is a fuzzy number 1/3, another expert's choice is a fuzzy number 1/4.，So, the similarity between their two people's opinions is 0.1215 otherwise 0

When an expert's choice is a fuzzy number 1/4, another expert's choice is a fuzzy number 1/5.，So, the similarity between their two people's opinions is 0.1304 otherwise 0

When an expert's choice is a fuzzy number 1/5, another expert's choice is a fuzzy number 1/6.，So, the similarity between their two people's opinions is. 0.1346 otherwise 0

When an expert's choice is a fuzzy number 1/6, another expert's choice is a fuzzy number 1/7.，So, the similarity between their two people's opinions is. 0.1370 otherwise 0

When an expert's choice is a fuzzy number 1/7, another expert's choice is a fuzzy number 1/8.，So, the similarity between their two people's opinions is. 0.1385 otherwise 0

When an expert's choice is a fuzzy number 1/8, another expert's choice is a fuzzy number 1/9.，So, the similarity between their two people's opinions is 0.1795 otherwise 0

2-All expert questionnaire data, This word document is the data of all experts. If it is calculated manually, it takes a lot of time, so software MATLAB is used to write code for calculations. MATLAB code, please see word document : 4-The program code used to calculate.

The following screenshot is the mathematical formula 1 to 6 in the paper. The calculation code is based on these 6 formulas. Please see


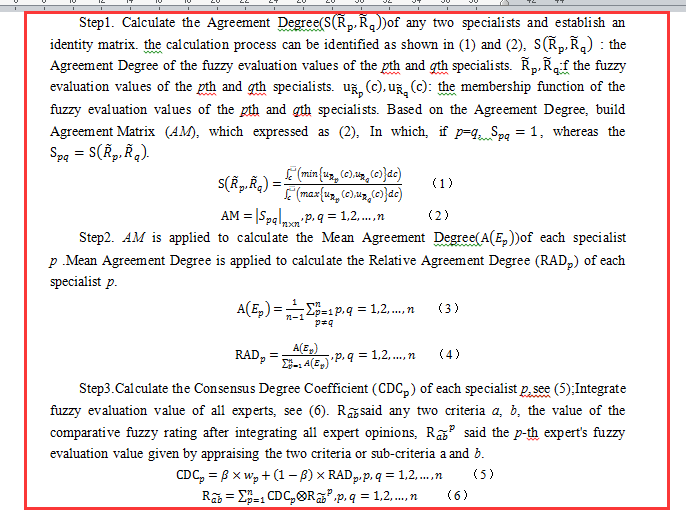

Supplement: f1 [file 4162539.f1.zip › Supplementary materials/2. SAM+FAHP/4-The results of the comparison of two expert opinions111.docx]
