# Supplementary material for: Continuous Fuzzy Kano Model and Fuzzy AHP Model for Aesthetic Product Design: Case Study of an Electric Scooter
Source: Hindawi journal article supplement (doi:10.1155/2018/4162539), 2018-09-20
Supplement: f1 [file 4162539.f1.zip]

Change the selected number to red according to your consent

**Question 1:**

1. If the shape of the electric scooter has a "simple and modern" style, how do you feel?

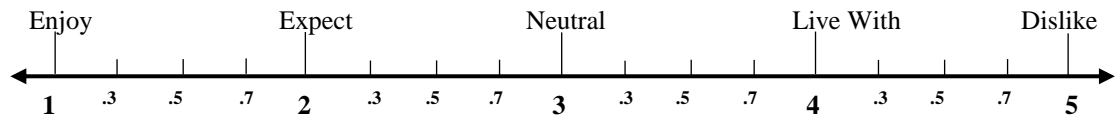

2.If the shape of the electric scooter does not have a "simple and modern" style, how do you feel?

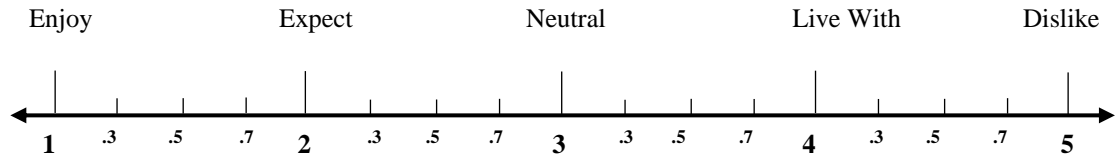

3.What is the importance of the "simple and modern" form of the electric scooter?

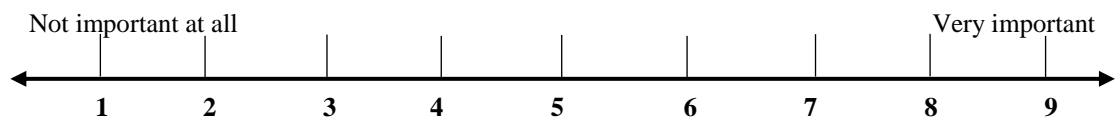

**Question 2:**

1.If the electric scooter has a "light" style, how do you feel?

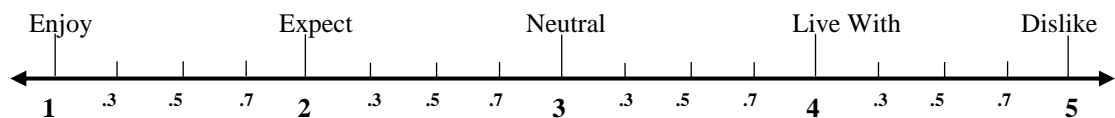

2. If the shape of the electric scooter does not have a "light" style, how do you feel?

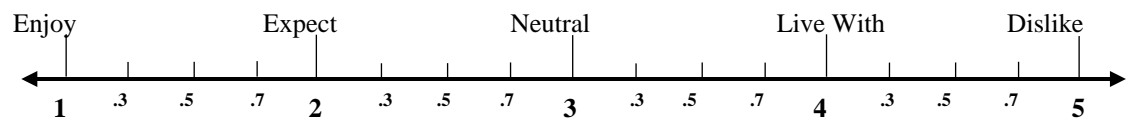

3. What is the importance of "lightweight" on the shape of the electric scooter?

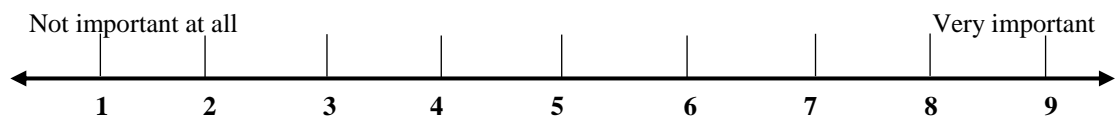

**Question 3:**

1. If the shape of the electric scooter has a "sharp racing" style, how do you feel?

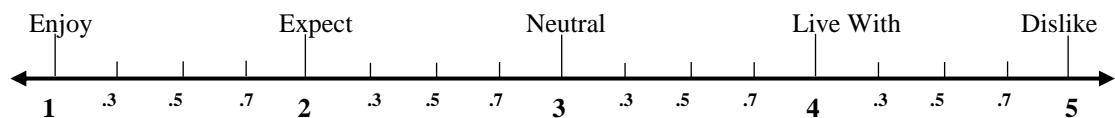

2.How do you feel if the shape of the electric scooter does not have a "sharp racing" style?

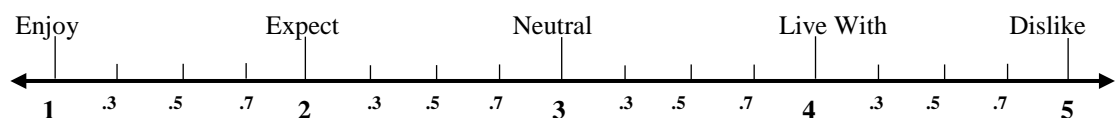

3.What do you think is the importance of the "sharp racing" on the shape of the electric scooter?

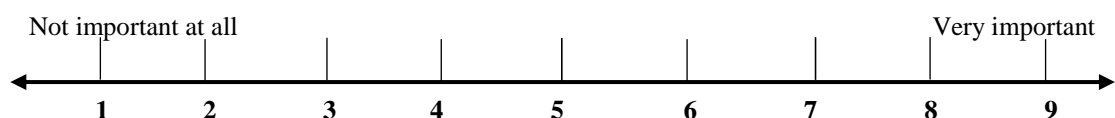

**Question 4:**

1. 正问。If the shape of the electric scooter has a "scientific sense" style, how do you feel?

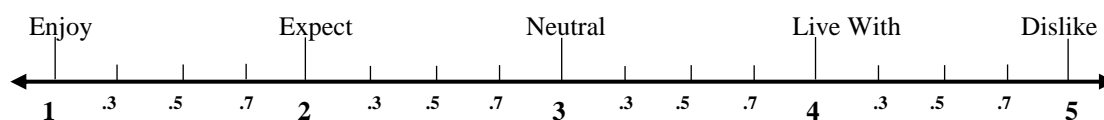

2. If the shape of the electric scooter does not have a "scientific sense" style, how do you feel?

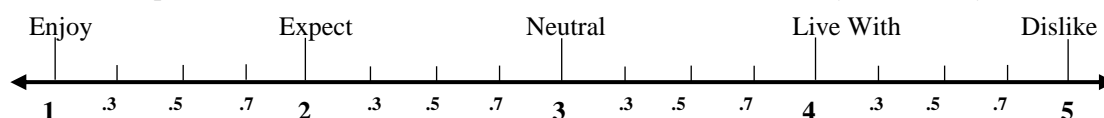

3. What is the importance of the "scientific sense of technology" on the shape of the electric scooter?

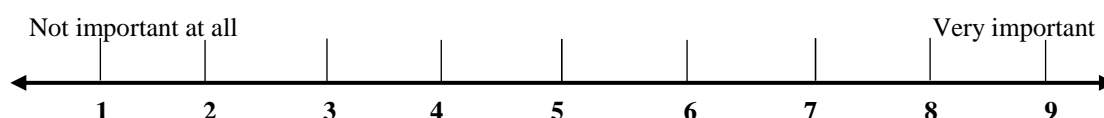

**Question 5:**

1. How do you feel if the electric scooter has a "round and cute" style?

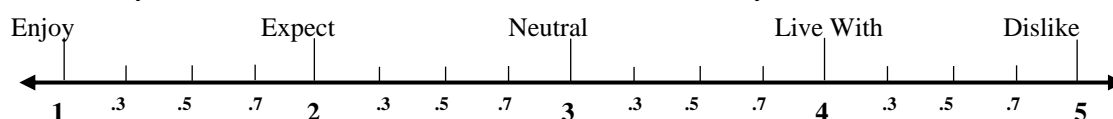

- 2.If the shape of the electric scooter does not have a "round and cute" style, how do you feel?

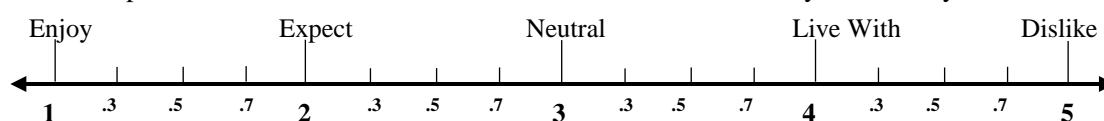

- 3.What is the importance of the "round and cute" shape of the electric scooter?

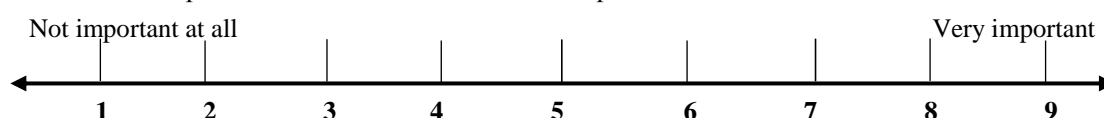

**Question 6:**

- 1.If the electric scooter has a "fashion" style, how do you feel?

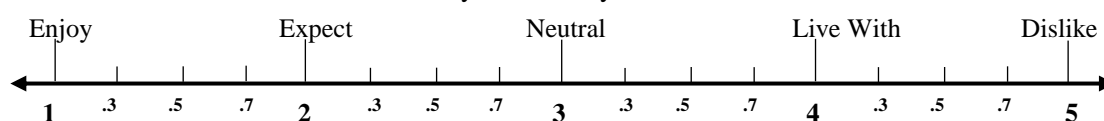

- 2.If the shape of the electric scooter does not have a "fashion" style, how do you feel?

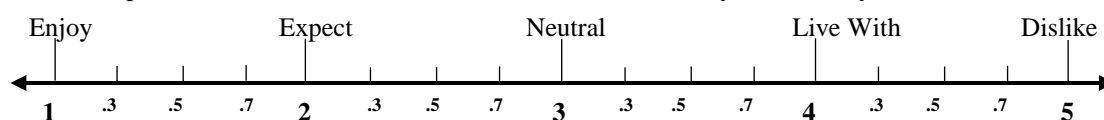

- 3.What is the importance of "fashionable" on the shape of the electric scooter?

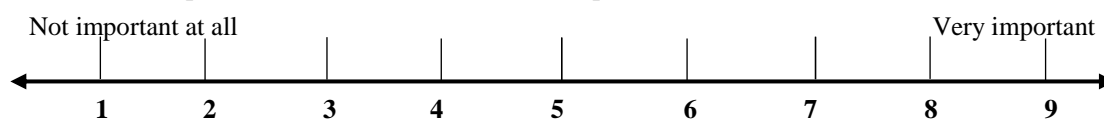

**Question 7:**

- 1.If the shape of the electric scooter has a "unique" style, how do you feel?
