# Supplementary material for: Continuous Fuzzy Kano Model and Fuzzy AHP Model for Aesthetic Product Design: Case Study of an Electric Scooter
Source: Hindawi journal article supplement (doi:10.1155/2018/4162539), 2018-09-20
Supplement: f1 [file 4162539.f1.zip]

Archive with 60 entries (52 files):
- New supplementary documentation/FAHP/
- New supplementary documentation/FAHP/5-Fuzzy Pairwise Comparison Matrix of Kansei Words.docx
- New supplementary documentation/KANO/
- New supplementary documentation/KANO/Kano Questionnaire data.docx
- New supplementary documentation/KANO/KANO questionnaire.pdf
- New supplementary documentation/KANO/KANO-The participant's answer is converted to a 55 matrix.txt
- New supplementary documentation/SAM/
- New supplementary documentation/SAM/4-The program code used to calculate.txt
- New supplementary documentation/SAM/SAM-Description of Equation 1-6.docx
- New supplementary documentation/SAM/SAM-explanation of formula 1.docx
- Supplementary materials/1. EI value calculation/
- Supplementary materials/1. EI value calculation/Continuous Fuzzy/
- Supplementary materials/1. EI value calculation/Continuous Fuzzy/C-FKM-FAHP.xlsx
- Supplementary materials/1. EI value calculation/Continuous Fuzzy/EI-Fashionable.xlsx
- Supplementary materials/1. EI value calculation/Continuous Fuzzy/EI-Feel of science and technology.xlsx
- Supplementary materials/1. EI value calculation/Continuous Fuzzy/EI-Graceful and smooth.xlsx
- Supplementary materials/1. EI value calculation/Continuous Fuzzy/EI-Light and exquisite.xlsx
- Supplementary materials/1. EI value calculation/Continuous Fuzzy/EI-Mellow and soft.xlsx
- Supplementary materials/1. EI value calculation/Continuous Fuzzy/EI-Simple and modern.xlsx
- Supplementary materials/1. EI value calculation/Continuous Fuzzy/EI-Special and cool.xlsx
- Supplementary materials/1. EI value calculation/Continuous Fuzzy/EI-Sports and racing.xlsx
- Supplementary materials/1. EI value calculation/Description of the calculation process.docx
- Supplementary materials/1. EI value calculation/Description of the calculation process.xlsx
- Supplementary materials/1. EI value calculation/Kano Questionnaire data.docx
- Supplementary materials/1. EI value calculation/KANO questionnaire.pdf
- Supplementary materials/1. EI value calculation/KANO-The participant's answer is converted to a 55 matrix.txt
- Supplementary materials/2. SAM+FAHP/
- Supplementary materials/2. SAM+FAHP/1-Questionnaire-male-E.doc
- Supplementary materials/2. SAM+FAHP/2-All expert questionnaire data.docx
- Supplementary materials/2. SAM+FAHP/3-Similarity Aggregation Method (SAM).docx
- Supplementary materials/2. SAM+FAHP/3-Similarity Aggregation Method (SAM)/
- Supplementary materials/2. SAM+FAHP/3-Similarity Aggregation Method (SAM)/0.5ú1⁄41ú1⁄42.png
- Supplementary materials/2. SAM+FAHP/3-Similarity Aggregation Method (SAM)/1ú1⁄41ú1⁄42.png
- Supplementary materials/2. SAM+FAHP/3-Similarity Aggregation Method (SAM)/1ú1⁄42ú1⁄43.png
- Supplementary materials/2. SAM+FAHP/3-Similarity Aggregation Method (SAM)/2ú1⁄43ú1⁄44.png
- Supplementary materials/2. SAM+FAHP/3-Similarity Aggregation Method (SAM)/8ú1⁄49ú1⁄49.png
- Supplementary materials/2. SAM+FAHP/3-Similarity Aggregation Method (SAM)/The reciprocal of the fuzzy number 1.png
- Supplementary materials/2. SAM+FAHP/3-Similarity Aggregation Method (SAM)/The reciprocal of the fuzzy number 2.png
- Supplementary materials/2. SAM+FAHP/3-Similarity Aggregation Method (SAM)/The reciprocal of the fuzzy number 3.png
- Supplementary materials/2. SAM+FAHP/3-Similarity Aggregation Method (SAM)/The reciprocal of the fuzzy number 4.png
- Supplementary materials/2. SAM+FAHP/3-Similarity Aggregation Method (SAM)/The reciprocal of the fuzzy number 5.png
- Supplementary materials/2. SAM+FAHP/3-Similarity Aggregation Method (SAM)/The reciprocal of the fuzzy number 6.png
- Supplementary materials/2. SAM+FAHP/3-Similarity Aggregation Method (SAM)/The reciprocal of the fuzzy number 7.png
- Supplementary materials/2. SAM+FAHP/3-Similarity Aggregation Method (SAM)/The reciprocal of the fuzzy number 8.png
- Supplementary materials/2. SAM+FAHP/4-The program code used to calculate.txt
- Supplementary materials/2. SAM+FAHP/4-The results of the comparison of two expert opinions111.docx
- Supplementary materials/2. SAM+FAHP/5-5-Fuzzy Pairwise Comparison Matrix of Kansei Words.docx
- Supplementary materials/2. SAM+FAHP/5-Fuzzy Pairwise Comparison Matrix of Kansei Words.docx
- Supplementary materials/2. SAM+FAHP/5-Fuzzy Pairwise Comparison Matrix of Kansei Words.txt
- Supplementary materials/2. SAM+FAHP/5-Fuzzy Pairwise Comparison Matrix of Kansei Words.xlsx
- Supplementary materials/2. SAM+FAHP/6-Defuzzification.xlsx
- Supplementary materials/2. SAM+FAHP/SAM-Description of Equation 1-6.docx
- Supplementary materials/2. SAM+FAHP/SAM-explanation of formula 1.docx
- Supplementary materials/3.QTT-I calculation/
- Supplementary materials/3.QTT-I calculation/calculation tool ,calculation results.xls
- Supplementary materials/3.QTT-I calculation/Data Analysis by QTT-I.xlsx
- Supplementary materials/3.QTT-I calculation/Quantitative Theory I Calculation Process Description.docx
- Supplementary materials/3.QTT-I calculation/Sample of the Independent variable input.docx
- Supplementary materials/3.QTT-I calculation/Simple and modern.png
- Supplementary materials/list with a concise description .txt
