# Supplementary material for: Continuous Fuzzy Kano Model and Fuzzy AHP Model for Aesthetic Product Design: Case Study of an Electric Scooter
Source: Hindawi journal article supplement (doi:10.1155/2018/4162539), 2018-09-20

Description: 5-Fuzzy Pairwise Comparison Matrix of Kansei Words, The author copied the data of this file to MATLAB for calculation.


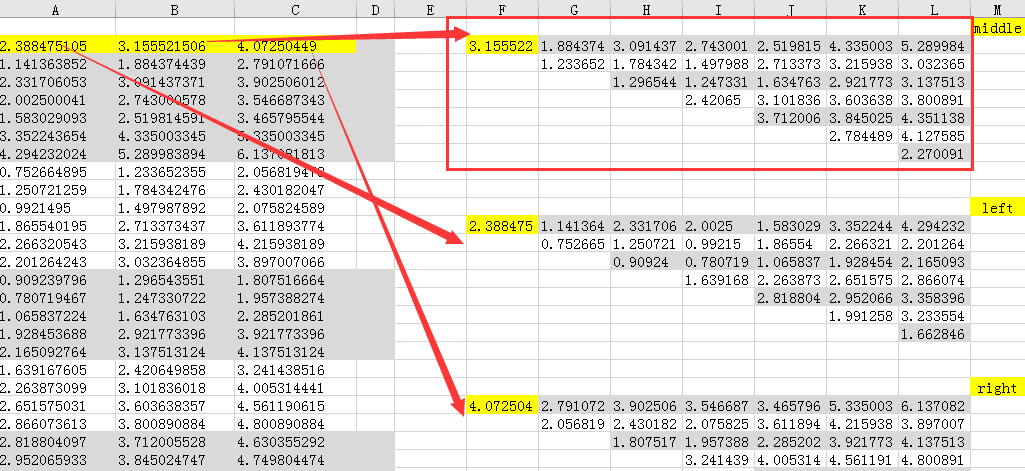


The researchers used these values to construct a fuzzy matrix.

The other half value of the matrix is the reciprocal of each value.


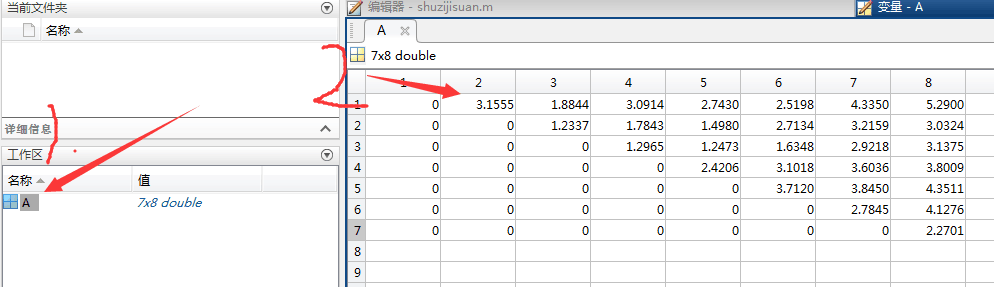


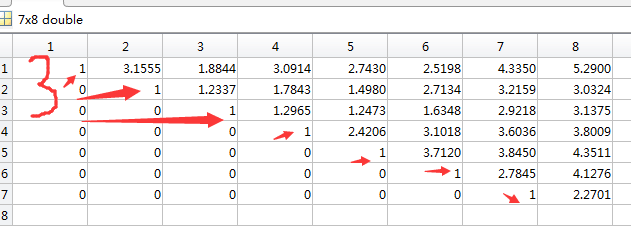


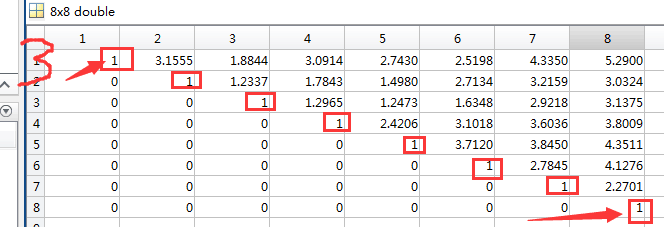


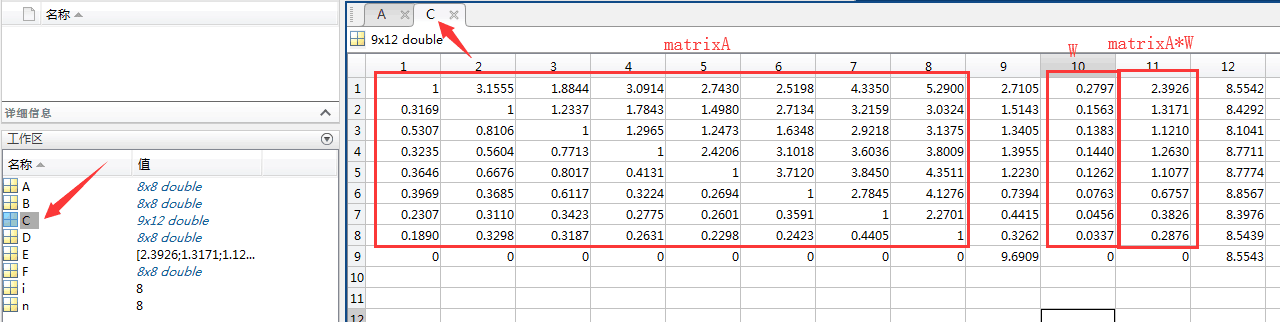


Below is the MATLAB calculation code for FAHP

A=A';

n=length(A);

B=1./tril(A,-1)';

B(B==inf)=0;

F=A+B;

F=F';

C=zeros(n+1,n+4);

C(1:n,1:n)=F;

for i=1:n

C(i,n+1)=prod(C(i,1:n))^(1/length(C(i,1:n)));

end

C(n+1,n+1)=sum(C(1:n,n+1));

for i=1:n

C(i,n+2)=C(i,n+1)/C(n+1,n+1);

end

D=F;

E=D*C(1:n,n+2);

for i=1:n

C(i,n+3)=E(i);

end

for i=1:n

C(i,n+4)=C(i,n+3)/C(i,n+2);

end

C(n+1,n+4)=sum(C(1:n,n+4))/n;

Through the establishment of this fuzzy matrix, according to the corresponding Mathematical formulas, researchers can calculate, Geometric mean, Weights, AW, λMax and so on .


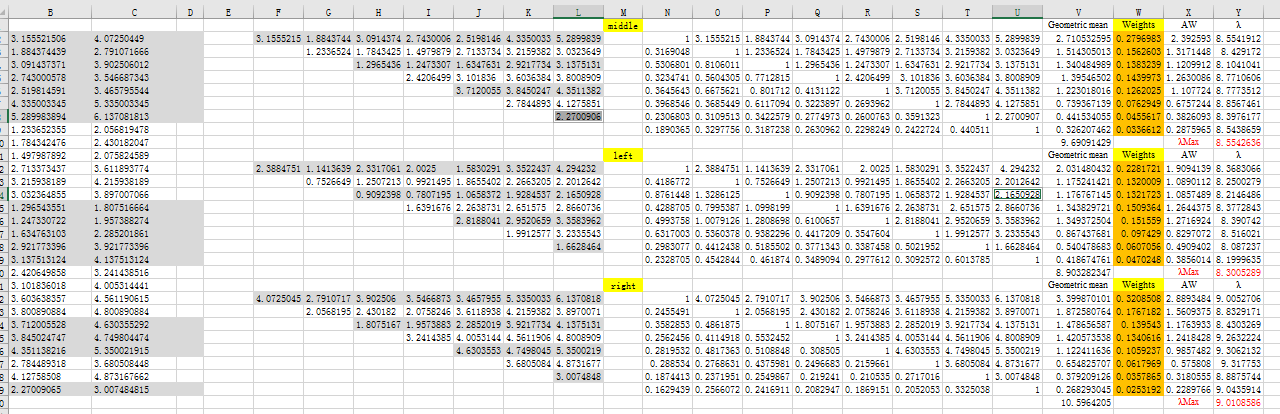

Supplement: f1 [file 4162539.f1.zip › New supplementary documentation/FAHP/5-Fuzzy Pairwise Comparison Matrix of Kansei Words.docx]
