# Supplementary material for: Continuous Fuzzy Kano Model and Fuzzy AHP Model for Aesthetic Product Design: Case Study of an Electric Scooter
Source: Hindawi journal article supplement (doi:10.1155/2018/4162539), 2018-09-20
Supplement: f1 [file 4162539.f1.zip › New supplementary documentation/KANO/Kano Questionnaire data.docx]

|  | Participant 1's answer | Participant 2's answer | Participant 3's answer | Participant 4's answer | 1-4th participant |
| --- | --- | --- | --- | --- | --- |
| Question 1 | A=[0 0.5 0.5 0 0]  B=[0 0 0.5 0.5 0] | A=[0 1 0 0 0]  B=[0 0 0.3 0.7 0] | A=[0.5 0.5 0 0 0]  B=[0 0 0 0.3 0.7] | A=[0.7 0.3 0 0 0]  B=[0 0 0.5 0.5 0] |
| Question 2 | A=[0.3 0.7 0 0 0]  B=[0 0.3 0.7 0 0] | A=[0.3 0.7 0 0 0]  B=[0 0 1 0 0] | A=[0 0 1 0 0]  B=[0 0.7 0.3 0 0] | A=[0 0.7 0.3 0 0]  B=[0 0.3 0.7 0 0] |
| Question 3 | A=[0 0 0.5 0.5 0]  B=[0 0.3 0.7 0 0] | A=[0 0 0 0 1]  B=[0 0.7 0.3 0 0] | A=[0 0 0 0 1]  B=[0 1 0 0 0] | A=[0 0 0.7 0.3 0]  B=[0 0.3 0.7 0 0] |
| Question 4 | A=[0.3 0.7 0 0 0]  B=[0 0 0.3 0.7 0] | A=[0 0.3 0.7 0 0]  B=[0 0 0 0.7 0.3] | A=[1 0 0 0 0]  B=[0 0 0 0 1] | A=[0.3 0.7 0 0 0]  B=[0 0 1 0 0] |
| Question 5 | A=[0 0 0.7 0.3 0]  B=[0 0.3 0.7 0 0] | A=[0 0 1 0 0]  B=[0 0.3 0.7 0 0] | A=[0 0.5 0.5 0 0]  B=[0 0 0.3 0.7 0] | A=[0.5 0.5 0 0 0]  B=[0 0 0.3 0.7 0] |
| Question 6 | A=[0.3 0.7 0 0 0]  B=[0 0 0 0.3 0.7] | A=[0 1 0 0 0]  B=[0 0 1 0 0] | A=[0 0.5 0.5 0 0]  B=[0 0 1 0 0] | A=[0.5 0.5 0 0 0]  B=[0 0 1 0 0] |
| Question 7 | A=[0 0.7 0.3 0 0]  B=[0 0.3 0.7 0 0] | A=[0 0.7 0.3 0 0]  B=[0 0.3 0.7 0 0] | A=[0 0 0.3 0.7 0]  B=[0 0.5 0.5 0 0] | A=[0 1 0 0 0]  B=[0 0 0 1 0] |
| Question 8 | A=[0.3 0.7 0 0 0]  B=[0 0 0 1 0] | A=[0.3 0.7 0 0 0]  B=[0 0 0 1 0] | A=[0 1 0 0 0]  B=[0 0 0.7 0.3 0] | A=[0.7 0.3 0 0 0]  B=[0 0 0 0.7 0.3] |

| Question number 1 | A=[0.3 0.7 0 0 0]  B=[0 0.3 0.7 0 0] | A=[0.7 0.3 0 0 0]  B=[0 0 0 0.7 0.3] | A=[0.7 0.3 0 0 0]  B=[0 0.5 0.5 0 0] | A=[0 0.3 0.7 0 0]  B=[0 0 0 0.7 0.3] | 5-8 |
| --- | --- | --- | --- | --- | --- |
| Question number 2 | A=[0.3 0.7 0 0 0]  B=[0 0 1 0 0] | A=[0 0.3 0.7 0 0]  B=[0 0 0 0.7 0.3] | A=[0.7 0.3 0 0 0]  B=[0 0 0.5 0.5 0] | A=[0.3 0.7 0 0 0]  B=[0 0 0.3 0.7 0] |
| Question number 3 | A=[0 0 1 0 0]  B=[0 0.3 0.7 0 0] | A=[0 0.3 0.7 0 0]  B=[0 0 0.3 0.7 0] | A=[0 0 0.3 0.7 0]  B=[0 0 0 0.7 0.3] | A=[0.3 0.7 0 0 0]  B=[0 0 0 0.7 0.3] |
| Question number 4 | A=[0 0.3 0.7 0 0]  B=[0 0 0.5 0.5 0] | A=[0.7 0.3 0 0 0]  B=[0 0.3 0.7 0 0] | A=[0.5 0.5 0 0 0]  B=[0 0 0 0.7 0.3] | A=[0 0.5 0.5 0 0]  B=[0 0 0.5 0.5 0] |
| Question number 5 | A=[0 0 1 0 0]  B=[0 0 1 0 0] | A=[0 0.3 0.7 0 0]  B=[0 0 1 0 0] | A=[0 0 0.5 0.5 0]  B=[0 0 0.7 0.3 0] | A=[0.3 0.7 0 0 0]  B=[0 0 0 0.7 0.3] |
| Question number 6 | A=[0 0.3 0.7 0 0]  B=[0 0 0.5 0.5 0] | A=[0 0.3 0.7 0 0]  B=[0 0 0.3 0.7 0] | A=[0 0 0.5 0.5 0]  B=[0 0 0 0.3 0.7] | A=[0.5 0.5 0 0 0]  B=[0 0 0 0.5 0.5] |
| Question number 7 | A=[0.3 0.7 0 0 0]  B=[0 0 0.3 0.7 0] | A=[0 0.3 0.7 0 0]  B=[0 0 1 0 0] | A=[0.3 0.7 0 0 0]  B=[0 0 0 0.7 0.3] | A=[0 0 0.3 0.7 0]  B=[0 0 0 1 0] |
| Question number 8 | A=[0.3 0.7 0 0 0]  B=[0 0 0.5 0.5 0] | A=[0.3 0.7 0 0 0]  B=[0 0 0 0.3 0.7] | A=[0 0.7 0.3 0 0]  B=[0 0 0 1 0] | A=[0.5 0.5 0 0 0]  B=[0 0 0 0.7 0.3] |

| Question number 1 | A=[0.5 0.5 0 0 0]  B=[0 0 0 0.3 0.7] | A=[1 0 0 0 0]  B=[0 0 0 0.3 0.7] | A=[0 0.3 0.7 0 0]  B=[0 0 0 1 0] | A=[0.7 0.3 0 0 0]  B=[0 0 1 0 0] | 9-12 |
| --- | --- | --- | --- | --- | --- |
| Question number 2 | A=[0 0 1 0 0]  B=[0 0.5 0.5 0 0] | A=[0.3 0.7 0 0 0]  B=[0 0 1 0 0] | A=[0 0 0.7 0.3 0]  B=[0 0.3 0.7 0 0] | A=[0.7 0.3 0 0 0]  B=[0 0 0.3 0.7 0] |
| Question number 3 | A=[0 0.3 0.7 0 0]  B=[0 1 0 0 0] | A=[0 0 1 0 0]  B=[0 0 0.5 0.5 0] | A=[0 0.5 0.5 0 0]  B=[0 0 0.5 0.5 0] | A=[0 0.7 0.3 0 0]  B=[0 0 0.7 0.3 0] |
| Question number 4 | A=[0 0 1 0 0]  B=[0 0 1 0 0] | A=[0.7 0.3 0 0 0]  B=[0 0 0.5 0.5 0] | A=[0 0.5 0.5 0 0]  B=[0 0 0.5 0.5 0] | A=[0.5 0.5 0 0 0]  B=[0 0 0.3 0.7 0] |
| Question number 5 | A=[0 0.5 0.5 0 0]  B=[0 0.5 0.5 0 0] | A=[0.5 0.5 0 0 0]  B=[0 0.3 0.7 0 0] | A=[0 0.5 0.5 0 0]  B=[0 0.5 0.5 0 0] | A=[0.7 0.3 0 0 0]  B=[0 0 0 0.7 0.3] |
| Question number 6 | A=[0 0 0.7 0.3 0]  B=[0 0 0.5 0.5 0] | A=[0.7 0.3 0 0 0]  B=[0 0 0 0.7 0.3] | A=[0 0.5 0.5 0 0]  B=[0 0 0.5 0.5 0] | A=[0.7 0.3 0 0 0]  B=[0 0 0.5 0.5 0] |
| Question number 7 | A=[0 0 0.3 0.7 0]  B=[0 0 0.7 0.3 0] | A=[1 0 0 0 0]  B=[0 0 0 0.5 0.5] | A=[0 0.7 0.3 0 0]  B=[0 0 0.7 0.3 0] | A=[0.7 0.3 0 0 0]  B=[0 0 0.7 0.3 0] |
| Question number 8 | A=[0 0.7 0.3 0 0]  B=[0 0.5 0.5 0 0] | A=[0.7 0.3 0 0 0]  B=[0 0 0 0.5 0.5] | A=[0 0.7 0.3 0 0]  B=[0 0 0.3 0.7 0] | A=[0.7 0.3 0 0 0]  B=[0 0 0.5 0.5 0] |

| Question number 1 | A=[1 0 0 0 0]  B=[0 0 0 0.7 0.3] | A=[0 0.3 0.7 0 0]  B=[0 0 0 0.5 0.5] | A=[1 0 0 0 0]  B=[0 0 0 0 1] | A=[0.3 0.7 0 0 0]  B=[0 0 0.5 0.5 0] | 13-16 |
| --- | --- | --- | --- | --- | --- |
| Question number 2 | A=[0.3 0.7 0 0 0]  B=[0 0.3 0.7 0 0] | A=[0 0 0.3 0.7 0]  B=[0 0 0.5 0.5 0] | A=[0 0.7 0.3 0 0]  B=[0 0.5 0.5 0 0] | A=[0 1 0 0 0]  B=[0 0 0.5 0.5 0] |
| Question number 3 | A=[0 0.5 0.5 0 0]  B=[0 0 1 0 0] | A=[0 0 0.3 0.7 0]  B=[0 0 0 0.5 0.5] | A=[0 0.3 0.7 0 0]  B=[0 0 0.7 0.3 0] | A=[0 0 0.3 0.7 0]  B=[0 0.5 0.5 0 0] |
| Question number 4 | A=[0.7 0.3 0 0 0]  B=[0 0 1 0 0] | A=[0 0.5 0.5 0 0]  B=[0 0 0.5 0.5 0] | A=[0.5 0.5 0 0 0]  B=[0 0 0 1 0] | A=[0 0.7 0.3 0 0]  B=[0 0 1 0 0] |
| Question number 5 | A=[0.5 0.5 0 0 0]  B=[0 0 0.5 0.5 0] | A=[0 0 0.7 0.3 0]  B=[0 0 0.7 0.3 0] | A=[1 0 0 0 0]  B=[0 0 0 0 1] | A=[0 1 0 0 0]  B=[0 0 1 0 0] |
| Question number 6 | A=[0.5 0.5 0 0 0]  B=[0 0 1 0 0] | A=[0 0.5 0.5 0 0]  B=[0 0 0.5 0.5 0] | A=[0.7 0.3 0 0 0]  B=[0 0 0 0.3 0.7] | A=[0.5 0.5 0 0 0]  B=[0 0 0.3 0.7 0] |
| Question number 7 | A=[0 0.5 0.5 0 0]  B=[0 0 0.5 0.5 0] | A=[0 0.5 0.5 0 0]  B=[0 0.5 0.5 0 0] | A=[0 0 0 0.7 0.3]  B=[0 0.5 0.5 0 0] | A=[0.5 0.5 0 0 0]  B=[0 0 0.5 0.5 0] |
| Question number 8 | A=[0.7 0.3 0 0 0]  B=[0 0 0.7 0.3 0] | A=[0 0.5 0.5 0 0]  B=[0 0 0.5 0.5 0] | A=[0.5 0.5 0 0 0]  B=[0 0 0 0.5 0.5] | A=[0 0.7 0.3 0 0]  B=[0 0 1 0 0] |

| Question number 1 | A=[0.5 0.5 0 0 0]  B=[0 0 0 0.5 0.5] | A=[0.7 0.3 0 0 0]  B=[0 0 0 0.3 0.7] | A=[0 0.5 0.5 0 0]  B=[0 0 0 0.5 0.5] | A=[0.5 0.5 0 0 0]  B=[0 0 0 0.5 0.5] | 17-20 |
| --- | --- | --- | --- | --- | --- |
| Question number 2 | A=[0.5 0.5 0 0 0]  B=[0 0 0 0.7 0.3] | A=[0 0 0.7 0.3 0]  B=[0 0.3 0.7 0 0] | A=[0 0.7 0.3 0 0]  B=[0 0 0 0.7 0.3] | A=[0 0.3 0.7 0 0]  B=[0 0 0 1 0] |
| Question number 3 | A=[0 0.3 0.7 0 0]  B=[0 0 0.5 0.5 0] | A=[0 0.5 0.5 0 0]  B=[0 0 0.5 0.5 0] | A=[0 0.5 0.5 0 0]  B=[0 0 0 0.5 0.5] | A=[0 1 0 0 0]  B=[0 0 0 0 1] |
| Question number 4 | A=[0.3 0.7 0 0 0]  B=[0 0 0.7 0.3 0] | A=[0.7 0.3 0 0 0]  B=[0 0 0 0.3 0.7] | A=[0.7 0.3 0 0 0]  B=[0 0 0 0.7 0.3] | A=[0.5 0.5 0 0 0]  B=[0 0 0 1 0] |
| Question number 5 | A=[0 0.3 0.7 0 0]  B=[0 0 0.5 0.5 0] | A=[0.7 0.3 0 0 0]  B=[0 0 0 0.3 0.7] | A=[0 0 0 0.7 0.3]  B=[0 0.5 0.5 0 0] | A=[0 1 0 0 0]  B=[0 1 0 0 0] |
| Question number 6 | A=[0.3 0.7 0 0 0]  B=[0 0 0 0.5 0.5] | A=[0 0.7 0.3 0 0]  B=[0 0 0.5 0.5 0] | A=[0.7 0.3 0 0 0]  B=[0 0 0 0.5 0.5] | A=[0.5 0.5 0 0 0]  B=[0.5 0.5 0 0 0] |
| Question number 7 | A=[0.7 0.3 0 0 0]  B=[0 0 0 0.5 0.5] | A=[0 0.7 0.3 0 0]  B=[0 0 0.3 0.7 0] | A=[0.5 0.5 0 0 0]  B=[0 0 0 0.3 0.7] | A=[0 1 0 0 0]  B=[0 0 0 0 1] |
| Question number 8 | A=[0.3 0.7 0 0 0]  B=[0 0 0 0.7 0.3] | A=[0.7 0.3 0 0 0]  B=[0 0 0 0.5 0.5] | A=[0 0.5 0.5 0 0]  B=[0 0 0 0.5 0.5] | A=[1 0 0 0 0]  B=[0 0 0 1 0] |

| Question number 1 | A=[0.7 0.3 0 0 0]  B=[0 0 0 0.3 0.7] | A=[0.5 0.5 0 0 0]  B=[0 0 0 0.3 0.7] | A=[0.3 0.7 0 0 0]  B=[0 0 0 0.7 0.3] | A=[0.7 0.3 0 0 0]  B=[0 0 0.5 0.5 0] | 20-24 |
| --- | --- | --- | --- | --- | --- |
| Question number 2 | A=[0.5 0.5 0 0 0]  B=[0 0 0 0.7 0.3] | A=[0 0.7 0.3 0 0]  B=[0 0 0.5 0.5 0] | A=[0.3 0.7 0 0 0]  B=[0 0 0 0.5 0.5] | A=[0.3 0.7 0 0 0]  B=[0 0 1 0 0] |
| Question number 3 | A=[0 0.7 0.3 0 0]  B=[0 0 0.5 0.5 0] | A=[0 0 1 0 0]  B=[0 0 0.5 0.5 0] | A=[0 0 0.3 0.7 0]  B=[0 0.7 0.3 0 0] | A=[0 0 0.3 0.7 0]  B=[0 0 1 0 0] |
| Question number 4 | A=[0.7 0.3 0 0 0]  B=[0 0 0 0.3 0.7] | A=[0.7 0.3 0 0 0]  B=[0 0 0.3 0.7 0] | A=[0 1 0 0 0]  B=[0 0 1 0 0] | A=[0.7 0.3 0 0 0]  B=[0 0 0 1 0] |
| Question number 5 | A=[0.7 0.3 0 0 0]  B=[0 0 0 0.5 0.5] | A=[0 0.7 0.3 0 0]  B=[0 0 0.5 0.5 0] | A=[0 0.5 0.5 0 0]  B=[0 0 1 0 0] | A=[0.3 0.7 0 0 0]  B=[0 0 1 0 0] |
| Question number 6 | A=[0.5 0.5 0 0 0]  B=[0 0 0 0.3 0.7] | A=[0.3 0.7 0 0 0]  B=[0 0 0.3 0.7 0] | A=[0 0.3 0.7 0 0]  B=[0 0 1 0 0] | A=[0.7 0.3 0 0 0]  B=[0 0 0 0.3 0.7] |
| Question number 7 | A=[0.3 0.7 0 0 0]  B=[0 0 0.3 0.7 0] | A=[0 0 1 0 0]  B=[0 0 1 0 0] | A=[0 0.3 0.7 0 0]  B=[0 0 0.7 0.3 0] | A=[0.5 0.5 0 0 0]  B=[0 0 0.7 0.3 0] |
| Question number 8 | A=[0.5 0.5 0 0 0]  B=[0 0 0 0.7 0.3] | A=[0.7 0.3 0 0 0]  B=[0 0 0.5 0.5 0] | A=[0 0.7 0.3 0 0]  B=[0 0 1 0 0] | A=[0.7 0.3 0 0 0]  B=[0 0 0.7 0.3 0] |

| Question number 1 | A=[1 0 0 0 0]  B=[0 0 0 0.3 0.7] | A=[0.7 0.3 0 0 0]  B=[0 0 0 0.7 0.3] | A=[0.7 0.3 0 0 0]  B=[0 0 0.3 0.7 0] | A=[0 0.7 0.3 0 0]  B=[0 0 0 0 1] | 25-28 |
| --- | --- | --- | --- | --- | --- |
| Question number 2 | A=[0.5 0.5 0 0 0]  B=[0 0 0.5 0.5 0] | A=[1 0 0 0 0]  B=[0 0 0 0.5 0.5] | A=[0 0 0.7 0.3 0]  B=[0 0.3 0.7 0 0] | A=[0 0 0.7 0.3 0]  B=[0 0 1 0 0] |
| Question number 3 | A=[0 0 0.5 0.5 0]  B=[0 0.7 0.3 0 0] | A=[0 0.5 0.5 0 0]  B=[0 0 0 1 0] | A=[0 1 0 0 0]  B=[0 0 0 1 0] | A=[0 0 0.3 0.7 0]  B=[0 0.5 0.5 0 0] |
| Question number 4 | A=[0 1 0 0 0]  B=[0 0 0 0.5 0.5] | A=[0.5 0.5 0 0 0]  B=[0 0 0 0.7 0.3] | A=[0.5 0.5 0 0 0]  B=[0 0 0.3 0.7 0] | A=[0 0 0.3 0.7 0]  B=[0 0.5 0.5 0 0] |
| Question number 5 | A=[0 0 1 0 0]  B=[0 0 0.7 0.3 0] | A=[0 0.5 0.5 0 0]  B=[0 0 0.7 0.3 0] | A=[0 0.5 0.5 0 0]  B=[0 0 0.7 0.3 0] | A=[0 0.7 0.3 0 0]  B=[0 0 0 1 0] |
| Question number 6 | A=[0.3 0.7 0 0 0]  B=[0 0 0 0.7 0.3] | A=[0 0.7 0.3 0 0]  B=[0 0 0.3 0.7 0] | A=[0 0.5 0.5 0 0]  B=[0 0 0.3 0.7 0] | A=[0 0.7 0.3 0 0]  B=[0 0 0 0.5 0.5] |
| Question number 7 | A=[0 0 1 0 0]  B=[0 0 1 0 0] | A=[0.7 0.3 0 0 0]  B=[0 0 0.5 0.5 0] | A=[0 0.5 0.5 0 0]  B=[0 0 0.5 0.5 0] | A=[0 0 0.3 0.7 0]  B=[0 0.3 0.7 0 0] |
| Question number 8 | A=[1 0 0 0 0]  B=[0 0 0 0.3 0.7] | A=[0.7 0.3 0 0 0]  B=[0 0 0 0.5 0.5] | A=[0 1 0 0 0]  B=[0 0 0.3 0.7 0] | A=[0.3 0.7 0 0 0]  B=[0 0 0 0 1] |

| Question number 1 | A=[0.7 0.3 0 0 0]  B=[0 0 0 0.3 0.7] | A=[1 0 0 0 0]  B=[0 0 0.3 0.7 0] | A=[1 0 0 0 0]  B=[0 0 0 0 1] | A=[0.5 0.5 0 0 0]  B=[0 0 0.5 0.5 0] | 29-32 |
| --- | --- | --- | --- | --- | --- |
| Question number 2 | A=[0.7 0.3 0 0 0]  B=[0 0 0 0.3 0.7] | A=[1 0 0 0 0]  B=[0 0 0.3 0.7 0] | A=[0 0.5 0.5 0 0]  B=[0 0 0.3 0.7 0] | A=[0.5 0.5 0 0 0]  B=[0 0 0.5 0.5 0] |
| Question number 3 | A=[0.3 0.7 0 0 0]  B=[0 0 0.7 0.3 0] | A=[0 0 0 0.3 0.7]  B=[0.3 0.7 0 0 0] | A=[0 0 0 0.3 0.7]  B=[0 0.7 0.3 0 0] | A=[0 0 0 0.5 0.5]  B=[0 0 1 0 0] |
| Question number 4 | A=[0.3 0.7 0 0 0]  B=[0 0 0 0.5 0.5] | A=[1 0 0 0 0]  B=[0 0 0.3 0.7 0] | A=[0 0.7 0.3 0 0]  B=[0 0 0.3 0.7 0] | A=[1 0 0 0 0]  B=[0 0 0 1 0] |
| Question number 5 | A=[0 1 0 0 0]  B=[0 0 0 0.5 0.5] | A=[0.3 0.7 0 0 0]  B=[0 0.3 0.7 0 0] | A=[0 1 0 0 0]  B=[0 0 0 1 0] | A=[0 0 1 0 0]  B=[0 0 1 0 0] |
| Question number 6 | A=[0.3 0.7 0 0 0]  B=[0 0 1 0 0] | A=[1 0 0 0 0]  B=[0 0 0 0.5 0.5] | A=[0 1 0 0 0]  B=[0 0 0 1 0] | A=[0.5 0.5 0 0 0]  B=[0 0 0 0.5 0.5] |
| Question number 7 | A=[0 0.7 0.3 0 0]  B=[0 0 0 1 0] | A=[1 0 0 0 0]  B=[0 0 0.3 0.7 0] | A=[1 0 0 0 0]  B=[0 0 0 0 1] | A=[1 0 0 0 0]  B=[0 0 0 1 0] |
| Question number 8 | A=[0.7 0.3 0 0 0]  B=[0 0 0 0.3 0.7] | A=[1 0 0 0 0]  B=[0 0 0 0.3 0.7] | A=[0.3 0.7 0 0 0]  B=[0 0 0 0.5 0.5] | A=[0 0 1 0 0]  B=[0 0 1 0 0] |

| Question number 1 | A=[0 0 1 0 0];  B=[0 0 0 1 0]; | A=[0 1 0 0 0];  B=[0 0 0 0 1]; | A=[1 0 0 0 0];  B=[0 0 0 0.3 0.7]; | A=[0.5 0.5 0 0 0];  B=[0 0 0 1 0]; | 33-36 |
| --- | --- | --- | --- | --- | --- |
| Question number 2 | A=[0.3 0.7 0 0 0];  B=[0 0 0 0 1]; | A=[0 0 0.3 0.7 0];  B=[0 0.7 0.3 0 0]; | A=[0.3 0.7 0 0 0];  B=[0 0 0 0.7 0.3]; | A=[0 1 0 0 0];  B=[0 0 0.5 0.5 0]; |
| Question number 3 | A=[0 0 0 0 1];  B=[0 0.3 0.7 0 0]; | A=[0 0 0.7 0.3 0];  B=[0 1 0 0 0]; | A=[0 0 0.5 0.5 0];  B=[0 0 1 0 0]; | A=[0.5 0.5 0 0 0];  B=[0 0 1 0 0]; |
| Question number 4 | A=[0 0.5 0.5 0 0];  B=[0 0 0.5 0.5 0]; | A=[0.5 0.5 0 0 0];  B=[0 0 0 1 0]; | A=[0 0.7 0.3 0 0];  B=[0 0 0.3 0.7 0]; | A=[1 0 0 0 0];  B=[0 0 0 1 0]; |
| Question number 5 | A=[0 0.3 0.7 0 0];  B=[0 0 0.3 0.7 0]; | A=[0 0.3 0.7 0 0];  B=[0 0 1 0 0]; | A=[0 0.7 0.3 0 0];  B=[0 0 0.3 0.7 0]; | A=[0 0 0.7 0.3 0];  B=[0 0 1 0 0]; |
| Question number 6 | A=[0 0 0 0.3 0.5];  B=[0 0 0.5 0.5 0]; | A=[0 0 0 1 0];  B=[0 0 1 0 0]; | A=[0 0 1 0 0];  B=[0 0.3 0.7 0 0]; | A=[0 1 0 0 0];  B=[0 0 0.7 0.3 0]; |
| Question number 7 | A=[0.3 0.7 0 0 0];  B=[0 0 0 0 1]; | A=[0 0 0 1 0];  B=[0 0 0 1 0]; | A=[0 0.7 0.3 0 0];  B=[0 0 0.7 0.3 0]; | A=[0 0 1 0 0];  B=[0 0 1 0 0]; |
| Question number 8 | A=[0 0.5 0.5 0 0];  B=[0 0 0 0 1]; | A=[0 0 0 1 0];  B=[0 0 0 1 0]; | A=[0.3 0.7 0 0 0];  B=[0 0 0 0.5 0.5]; | A=[0.7 0.3 0 0 0];  B=[0 0 0 0.7 0.3]; |

| Question number 1 | A=[0.5 0.5 0 0 0];  B=[0 0 0.3 0.7 0]; | A=[0 0 1 0 0];  B=[0 0 0 1 0]; | A=[0 0 1 0 0];  B=[0 0 1 0 0]; | A=[0 1 0 0 0];  B=[0 0 0 0.5 0.5]; | 37-40 |
| --- | --- | --- | --- | --- | --- |
| Question number 2 | A=[0.5 0.5 0 0 0];  B=[0 0 0 0.5 0.5]; | A=[0 0 0 1 0];  B=[0 0.3 0.7 0 0]; | A=[0 0 0.7 0.3 0];  B=[0 0 0 0.5 0.5]; | A=[0 1 0 0 0];  B=[0 0 0 1 0]; |
| Question number 3 | A=[0 0 0.5 0.5 0];  B=[0 0 0.7 0.3 0]; | A=[1 0 0 0 0];  B=[0 0 1 0 0]; | A=[0 0.3 0.7 0 0];  B=[0 0 0 0 1]; | A=[0 0.3 0.7 0 0];  B=[0 0 1 0 0]; |
| Question number 4 | A=[0 0.3 0.7 0 0];  B=[0 0 0.5 0.5 0]; | A=[0 0 1 0 0];  B=[0 0 1 0 0]; | A=[0 0 1 0 0];  B=[0 0 0.5 0.5 0]; | A=[0 1 0 0 0];  B=[0 0 0 1 0]; |
| Question number 5 | A=[0.3 0.7 0 0 0];  B=[0 0 0 0.5 0.5]; | A=[0 1 0 0 0];  B=[0 0 0 1 0]; | A=[0 0.3 0.7 0 0];  B=[0 0 0 0 1]; | A=[0 0.3 0.7 0 0];  B=[0 0 1 0 0]; |
| Question number 6 | A=[0.5 0.5 0 0 0];  B=[0 0 0.3 0.7 0]; | A=[1 0 0 0 0];  B=[0 0 1 0 0]; | A=[0 0.7 0.3 0 0];  B=[0 0 0 1 0]; | A=[0 1 0 0 0];  B=[0 0 0 1 0]; |
| Question number 7 | A=[0 0 0.7 0.3 0];  B=[0 0 0.5 0.5 0]; | A=[0 1 0 0 0];  B=[0 0 0 0 1]; | A=[0 0.3 0.7 0 0];  B=[0 0 1 0 0]; | A=[1 0 0 0 0];  B=[0 0 0 0 1]; |
| Question number 8 | A=[0.3 0.7 0 0 0];  B=[0 0 0 0.7 0.3]; | A=[0 1 0 0 0];  B=[0 0 0 1 0]; | A=[0 0 0 1 0];  B=[0 0 1 0 0]; | A=[0 1 0 0 0];  B=[0 0 0 1 0]; |

| Question number 1 | A=[1 0 0 0 0];  B=[0 0 0 0.5 0.5]; | A=[0 0 0 1 0];  B=[0 0 0.5 0.5 0]; | A=[0 1 0 0 0];  B=[0 0.5 0.5 0 0]; | A=[0 0 0.7 0.3 0];  B=[0 0 0 0.3 0.7]; | 41-44 |
| --- | --- | --- | --- | --- | --- |
| Question number 2 | A=[1 0 0 0 0];  B=[0 0 0 0.3 0.7]; | A=[1 0 0 0 0];  B=[0 0 0 1 0]; | A=[0 0.7 0.3 0 0];  B=[0 0 0.3 0.7 0]; | A=[0.7 0.3 0 0 0];  B=[0 0 0 0.3 0.7]; |
| Question number 3 | A=[0 0 0 0.7 0.3];  B=[0 0.5 0.5 0 0]; | A=[0 0 0 0 1];  B=[0 1 0 0 0]; | A=[0 0 0.5 0.5 0];  B=[0 0.7 0.3 0 0]; | A=[0 0 0 0.3 0.7];  B=[0 0.3 0.7 0 0]; |
| Question number 4 | A=[0.3 0.7 0 0 0];  B=[0 0 0.7 0.3 0]; | A=[0.7 0.3 0 0 0];  B=[0 0 0 1 0]; | A=[0.3 0.7 0 0 0];  B=[0 0 0 0.5 0.5]; | A=[0 0 0 0.7 0.3];  B=[0 0 0.3 0.7 0]; |
| Question number 5 | A=[1 0 0 0 0];  B=[0 0 0 0.5 0.5]; | A=[0 1 0 0 0];  B=[0 1 0 0 0]; | A=[0 0 0.5 0.5 0];  B=[0 0.3 0.7 0 0]; | A=[0 0 1 0 0];  B=[0 0 1 0 0]; |
| Question number 6 | A=[0.5 0.5 0 0 0];  B=[0 0 0.5 0.5 0]; | A=[1 0 0 0 0];  B=[0 0 0 0 1]; | A=[0 0 0.3 0.7 0];  B=[0 0.5 0.5 0 0]; | A=[0.5 0.5 0 0 0];  B=[0 0 0 0.3 0.7]; |
| Question number 7 | A=[0.3 0.7 0 0 0];  B=[0 0 0.5 0.5 0]; | A=[0 0 1 0 0];  B=[0 0 1 0 0]; | A=[0 0.7 0.3 0 0];  B=[0 0 0 0.5 0.5]; | A=[0 0.5 0.5 0 0];  B=[0 0 0 0.7 0.3]; |
| Question number 8 | A=[0 0.5 0.5 0 0];  B=[0 0 0.7 0.3 0]; | A=[0 0 1 0 0];  B=[0 0 1 0 0]; | A=[0 0.5 0.5 0 0];  B=[0 0 0 0.7 0.3]; | A=[0 0 1 0 0];  B=[0 0 1 0 0]; |

| Question number 1 | A=[0 1 0 0 0];  B=[0 0 0 0 1]; | A=[0 0 0 1 0];  B=[0 0 0.3 0.7 0]; | A=[0 1 0 0 0];  B=[0 0 1 0 0]; | A=[0 0.5 0.5 0 0];  B=[0 0 0.5 0.5 0]; | 45-48 |
| --- | --- | --- | --- | --- | --- |
| Question number 2 | A=[0 1 0 0 0];  B=[0 0 0 1 0]; | A=[0 0.5 0.5 0 0];  B=[0 0 0.3 0.7 0]; | A=[1 0 0 0 0];  B=[0 0 0 0.5 0.5]; | A=[0 0 1 0 0];  B=[0 0 1 0 0]; |
| Question number 3 | A=[0 0 0 1 0];  B=[0 1 0 0 0]; | A=[0 1 0 0 0];  B=[0 0 0.7 0.3 0]; | A=[0 0.5 0.5 0 0];  B=[0 0 1 0 0]; | A=[0 0 1 0 0];  B=[0 0 1 0 0]; |
| Question number 4 | A=[1 0 0 0 0];  B=[0 0 0 0 1]; | A=[0 1 0 0 0];  B=[0 0 0.5 0.5 0]; | A=[1 0 0 0 0];  B=[0 0 0 1 0]; | A=[0 1 0 0 0];  B=[0 0 0 1 0]; |
| Question number 5 | A=[0.5 0.5 0 0 0];  B=[0 0 0 1 0]; | A=[0 0.3 0.7 0 0];  B=[0 0 1 0 0]; | A=[0 0 1 0 0];  B=[0 0 1 0 0]; | A=[0 0 1 0 0];  B=[0 0 1 0 0]; |
| Question number 6 | A=[0 0 0.5 0.5 0];  B=[0 0 0 1 0]; | A=[0 0.5 0.5 0 0];  B=[0 0 0 0.7 0.3]; | A=[0 1 0 0 0];  B=[0 0 1 0 0]; | A=[0 0.5 0.5 0 0];  B=[0 0 0.5 0.5 0]; |
| Question number 7 | A=[1 0 0 0 0];  B=[0 0 0 0 1]; | A=[0 0.3 0.7 0 0];  B=[0 0 0.5 0.5 0]; | A=[1 0 0 0 0];  B=[0 0 0 0 1]; | A=[0 1 0 0 0];  B=[0 0 0.5 0.5 0]; |
| Question number 8 | A=[0 0.5 0.5 0 0];  B=[0 0 0 0.5 0.5]; | A=[0 0.3 0.7 0 0];  B=[0 0 0.7 0.3 0]; | A=[0 1 0 0 0];  B=[0 0 0.5 0.5 0]; | A=[0 1 0 0 0];  B=[0 0.5 0.5 0 0]; |

| Question number 1 | A=[0 0.5 0.5 0 0];  B=[0 0 0 0.5 0.5]; | A=[0 0 1 0 0];  B=[0 0 0 0.5 0.5]; | A=[1 0 0 0 0];  B=[0 0 0 1 0]; | A=[0.3 0.7 0 0 0];  B=[0 0 0 0.7 0.3]; | 49-52 |
| --- | --- | --- | --- | --- | --- |
| Question number 2 | A=[0.7 0.3 0 0 0];  B=[0 0 0 0 1]; | A=[0 0 1 0 0];  B=[0 0 1 0 0]; | A=[1 0 0 0 0];  B=[0 0 1 0 0]; | A=[1 0 0 0 0];  B=[0 0 0 1 0]; |
| Question number 3 | A=[0 0 1 0 0];  B=[0 0 1 0 0]; | A=[0 0 1 0 0];  B=[0 0 1 0 0]; | A=[0 0 1 0 0];  B=[0 0 0 1 0]; | A=[0 0 1 0 0];  B=[0 0.3 0.7 0 0]; |
| Question number 4 | A=[0.5 0.5 0 0 0];  B=[0 0 0 0 1]; | A=[0.5 0.5 0 0 0];  B=[0 0 0 0.3 0.7]; | A=[1 0 0 0 0];  B=[0 0 0 0.5 0.5]; | A=[1 0 0 0 0];  B=[0 0 0 0 1]; |
| Question number 5 | A=[0 0 1 0 0];  B=[0 0 1 0 0]; | A=[0.5 0.5 0 0 0];  B=[0 0 0 0.3 0.7]; | A=[0 1 0 0 0];  B=[0 0 0 1 0]; | A=[1 0 0 0 0];  B=[0 0 0 0 1]; |
| Question number 6 | A=[0.5 0.5 0 0 0];  B=[0 0 0 0 1]; | A=[0.7 0.3 0 0 0];  B=[0 0 0 0 1]; | A=[0 1 0 0 0];  B=[0 0 0 1 0]; | A=[0.7 0.3 0 0 0];  B=[0 0 0 0.7 0.3]; |
| Question number 7 | A=[0.5 0.5 0 0 0];  B=[0 0 0 0 1]; | A=[0.3 0.7 0 0 0];  B=[0 0 0 0.5 0.5]; | A=[0 1 0 0 0];  B=[0 0 1 0 0]; | A=[1 0 0 0 0];  B=[0 0 0 1 0]; |
| Question number 8 | A=[0.7 0.3 0 0 0];  B=[0 0 0 0 1]; | A=[0.3 0.7 0 0 0];  B=[0 0 1 0 0]; | A=[0 0 1 0 0];  B=[0 0 1 0 0]; | A=[0 1 0 0 0];  B=[0 0 0 1 0]; |

| Question number 1 | A=[0.3 0.7 0 0 0];  B=[0 0 0 0.7 0.3]; | A=[0.7 0.3 0 0 0];  B=[0 0 0 0.5 0.5]; | A=[0 1 0 0 0];  B=[0 0 0 0.7 0.3]; | A=[0 1 0 0 0];  B=[0 0 1 0 0]; | 53-56 |
| --- | --- | --- | --- | --- | --- |
| Question number 2 | A=[1 0 0 0 0];  B=[0 0 0 1 0]; | A=[0.7 0.3 0 0 0];  B=[0 0 0 1 0]; | A=[0.3 0.7 0 0 0];  B=[0 0 1 0 0]; | A=[0.7 0.3 0 0 0];  B=[0 0 0 0.5 0.5]; |
| Question number 3 | A=[0 0 1 0 0];  B=[0 0.3 0.7 0 0]; | A=[1 0 0 0 0];  B=[0 0 0 0 1]; | A=[0 0 1 0 0];  B=[0 0 1 0 0]; | A=[0 0.7 0.3 0 0];  B=[0 0 0 0.7 0.3]; |
| Question number 4 | A=[1 0 0 0 0];  B=[0 0 0 0 1]; | A=[0 0 1 0 0];  B=[0 0 0 1 0]; | A=[1 0 0 0 0];  B=[0 0 1 0 0]; | A=[0.3 0.7 0 0 0];  B=[0 0 0 0.5 0.5]; |
| Question number 5 | A=[1 0 0 0 0];  B=[0 0 0 0 1]; | A=[1 0 0 0 0];  B=[0 0 0 0.3 0.7]; | A=[0 1 0 0 0];  B=[0 0 0 1 0]; | A=[0 0.7 0.3 0 0];  B=[0 0 0.5 0.5 0]; |
| Question number 6 | A=[0.7 0.3 0 0 0];  B=[0 0 0 0.7 0.3]; | A=[1 0 0 0 0];  B=[0 0 1 0 0]; | A=[0.3 0.7 0 0 0];  B=[0 0 0 1 0]; | A=[0.7 0.3 0 0 0];  B=[0 0 0 0.3 0.7]; |
| Question number 7 | A=[1 0 0 0 0];  B=[0 0 0 1 0]; | A=[1 0 0 0 0];  B=[0 0 0 1 0]; | A=[0.3 0.7 0 0 0];  B=[0 0 0 0.7 0.3]; | A=[0.7 0.3 0 0 0];  B=[0 0 0 0 1]; |
| Question number 8 | A=[0 1 0 0 0];  B=[0 0 0 1 0]; | A=[0.5 0.5 0 0 0];  B=[0 0 0.5 0.5 0]; | A=[0 1 0 0 0];  B=[0 0 0 1 0]; | A=[0 0.5 0.5 0 0];  B=[0 0 0 0.7 0.3]; |

| Question number 1 | A=[1 0 0 0 0];  B=[0 0 0 1 0]; | A=[0.3 0.7 0 0 0];  B=[0 0 0.5 0.5 0]; | A=[0 0.7 0.3 0 0];  B=[0 0 0.7 0.3 0]; | A=[0.7 0.3 0 0 0];  B=[0 0 0 1 0]; | 57-60 |
| --- | --- | --- | --- | --- | --- |
| Question number 2 | A=[0 1 0 0 0];  B=[0 0 0 1 0]; | A=[0.5 0.5 0 0 0];  B=[0 0 0 0.7 0.3]; | A=[0 0.7 0.3 0 0];  B=[0 0 0.7 0.3 0]; | A=[0 0.5 0.5 0 0];  B=[0 0 0.7 0.3 0]; |
| Question number 3 | A=[1 0 0 0 0];  B=[0 0 0 0 1]; | A=[0 0 0.5 0.5 0];  B=[0 0 0 0.7 0.3]; | A=[0 0 0 0.7 0.3];  B=[0 0.7 0.3 0 0]; | A=[0 0 0.3 0.7 0];  B=[0 0 0.7 0.3 0]; |
| Question number 4 | A=[0 0 0.7 0.3 0];  B=[0 0 0 1 0]; | A=[0 0.7 0.3 0 0];  B=[0 0 1 0 0]; | A=[0 0.7 0.3 0 0];  B=[0 0 0.5 0.5 0]; | A=[0 0.3 0.7 0 0];  B=[0 0 1 0 0]; |
| Question number 5 | A=[0 0 1 0 0];  B=[0 0 1 0 0]; | A=[0.3 0.7 0 0 0];  B=[0 0 0.3 0.7 0]; | A=[0 0.5 0.5 0 0];  B=[0 0 0.5 0.5 0]; | A=[0 0.5 0.5 0 0];  B=[0 0.3 0.7 0 0]; |
| Question number 6 | A=[0 0.5 0.5 0 0];  B=[0 0 0 1 0]; | A=[0 0.7 0.3 0 0];  B=[0 0 1 0 0]; | A=[0.3 0.7 0 0 0];  B=[0 0 0 0.7 0.3]; | A=[0 1 0 0 0];  B=[0 0 0 0.3 0.7]; |
| Question number 7 | A=[1 0 0 0 0];  B=[0 0 0 0.3 0.7]; | A=[0 0.3 0.7 0 0];  B=[0 0 1 0 0]; | A=[0.5 0.5 0 0 0];  B=[0 0 0 0.7 0.3]; | A=[0.5 0.5 0 0 0];  B=[0 0 0.3 0.7 0]; |
| Question number 8 | A=[0 0 1 0 0];  B=[0 0 1 0 0]; | A=[0.5 0.5 0 0 0];  B=[0 0 0 0.7 0.3]; | A=[0 0.5 0.5 0 0];  B=[0 0 0.3 0.7 0]; | A=[0.3 0.7 0 0 0];  B=[0 0 0.3 0.7 0]; |

| Question number 1 | A=[0.5 0.5 0 0 0];  B=[0 0 0.5 0.5 0]; | A=[0 0 1 0 0];  B=[0 0 1 0 0]; | A=[1 0 0 0 0];  B=[0 0 0 0 1]; | A=[0 0 0.7 0.3 0];  B=[0 0 0.3 0.7 0]; | 61-64 |
| --- | --- | --- | --- | --- | --- |
| Question number 2 | A=[0 0.7 0.3 0 0];  B=[0 0 1 0 0]; | A=[0 0 0 0 1];  B=[0 0 0 1 0]; | A=[0 1 0 0 0];  B=[0 0 1 0 0]; | A=[0 0.7 0.3 0 0];  B=[0 0 0.3 0.7 0]; |
| Question number 3 | A=[0 1 0 0 0];  B=[0 0 0 1 0]; | A=[0 0 1 0 0];  B=[0 0 1 0 0]; | A=[1 0 0 0 0];  B=[0 0 0 0 1]; | A=[0 0 0 0.7 0.3];  B=[0 0 0.7 0.3 0]; |
| Question number 4 | A=[0 1 0 0 0];  B=[0 0 0.3 0.7 0]; | A=[0.5 0.5 0 0 0];  B=[0 0 1 0 0]; | A=[1 0 0 0 0];  B=[0 0 0 0 1]; | A=[0 1 0 0 0];  B=[0 0 0.3 0.7 0]; |
| Question number 5 | A=[0 0 1 0 0];  B=[0 0 1 0 0]; | A=[0 0 0.5 0.5 0];  B=[0 0 1 0 0]; | A=[0 0 1 0 0];  B=[0 0 1 0 0]; | A=[0 0 1 0 0];  B=[0 0 0.7 0.3 0]; |
| Question number 6 | A=[0 1 0 0 0];  B=[0 0.3 0.7 0 0]; | A=[0 0 1 0 0];  B=[0 0 1 0 0]; | A=[0 1 0 0 0];  B=[0 0 1 0 0]; | A=[0 1 0 0 0];  B=[0 0 1 0 0]; |
| Question number 7 | A=[0.5 0.5 0 0 0];  B=[0 0 1 0 0]; | A=[0 1 0 0 0];  B=[0 0 1 0 0]; | A=[0 0 1 0 0];  B=[0 0 1 0 0]; | A=[1 0 0 0 0];  B=[0 0 0 0.3 0.7]; |
| Question number 8 | A=[0 0.7 0.3 0 0];  B=[0 0 0 1 0]; | A=[0 1 0 0 0];  B=[0 1 0 0 0]; | A=[0 0 1 0 0];  B=[0 0 1 0 0]; | A=[0 0 0.7 0.3 0];  B=[0 0 0.7 0.3 0]; |

| Question number 1 | A=[0 1 0 0 0];  B=[0 0 0.7 0.3 0]; | A=[0.5 0.5 0 0 0];  B=[0 0 0 1 0]; |  |  | 65-66 |
| --- | --- | --- | --- | --- | --- |
| Question number 2 | A=[0 1 0 0 0];  B=[0 0 1 0 0]; | A=[0.5 0.5 0 0 0];  B=[0 0 0 1 0]; |  |  |
| Question number 3 | A=[0.5 0.5 0 0 0];  B=[0 0 0.3 0.7 0]; | A=[0 1 0 0 0];  B=[0 0 0 1 0]; |  |  |
| Question number 4 | A=[1 0 0 0 0];  B=[0 0 0 0.5 0.5]; | A=[1 0 0 0 0];  B=[0 0 0 1 0]; |  |  |
| Question number 5 | A=[0 0.3 0.7 0 0];  B=[0 0 1 0 0]; | A=[0 0 1 0 0];  B=[0 0 1 0 0]; |  |  |
| Question number 6 | A=[0.3 0.7 0 0 0];  B=[0 0 0 1 0]; | A=[0.5 0.5 0 0 0];  B=[0 0 0 1 0]; |  |  |
| Question number 7 | A=[0.5 0.5 0 0 0];  B=[0 0 0 0.7 0.3]; | A=[0 0.3 0.7 0 0];  B=[0 0 0 0.5 0.5]; |  |  |
| Question number 8 | A=[0 1 0 0 0];  B=[0 0 0.7 0.3 0]; | A=[0.7 0.3 0 0 0];  B=[0 0 0 0.5 0.5]; |  |  |
