# Supplementary material for: Continuous Fuzzy Kano Model and Fuzzy AHP Model for Aesthetic Product Design: Case Study of an Electric Scooter
Source: Hindawi journal article supplement (doi:10.1155/2018/4162539), 2018-09-20
Supplement: f1 [file 4162539.f1.zip › New supplementary documentation/KANO/KANO-The participant's answer is converted to a 55 matrix.txt]

1.3=[0.7 0.3 0 0 0]
1.7=[0.3 0.7 0 0 0]
2.3=[0 0.7 0.3 0 0]
2.7=[0 0.3 0.7 0 0]
3.3=[0 0 0.7 0.3 0]
3.7=[0 0 0.3 0.7 0]
4.3=[0 0 0 0.7 0.3]
4.7=[0 0 0 0.3 0.7]
1.5=[0.5 0.5 0 0 0]
2.5=[0 0.5 0.5 0 0]
3.5=[0 0 0.5 0.5 0]
4.5=[0 0 0 0.5 0.5]
1=[1 0 0 0 0]
2=[0 1 0 0 0]
3=[0 0 1 0 0]
4=[0 0 0 1 0]
5=[0 0 0 0 1]
