# Supplementary material for: Continuous Fuzzy Kano Model and Fuzzy AHP Model for Aesthetic Product Design: Case Study of an Electric Scooter
Source: Hindawi journal article supplement (doi:10.1155/2018/4162539), 2018-09-20
Supplement: f1 [file 4162539.f1.zip › New supplementary documentation/SAM/4-The program code used to calculate.txt]

The author uses the MATLAB tool

n=length(A);
B=zeros(n,n);
C=zeros(n+1,n+3);
for i=1:n
    for j=1:n
        if A(i)==A(j)
            B(i,j)=1;
        elseif A(i)==1&&A(j)==2;
                B(i,j)=0.1667;
        elseif A(i)==2&&A(j)==3;
                B(i,j)=0.1429;
        elseif A(i)==3&&A(j)==4;
                B(i,j)=0.1429;  
        elseif A(i)==4&&A(j)==5;
                B(i,j)=0.1429; 
        elseif A(i)==5&&A(j)==6;
                B(i,j)=0.1429; 
        elseif A(i)==6&&A(j)==7;
                B(i,j)=0.1429; 
        elseif A(i)==7&&A(j)==8;
                B(i,j)=0.1429;
        elseif A(i)==8&&A(j)==9;
                B(i,j)=0.2;
        elseif A(i)==2&&A(j)==1;
                B(i,j)=0.1667;
        elseif A(i)==3&&A(j)==2;
                B(i,j)=0.1429;
        elseif A(i)==4&&A(j)==3;
                B(i,j)=0.1429;  
        elseif A(i)==5&&A(j)==4;
                B(i,j)=0.1429; 
        elseif A(i)==6&&A(j)==5;
                B(i,j)=0.1429; 
        elseif A(i)==7&&A(j)==6;
                B(i,j)=0.1429; 
        elseif A(i)==8&&A(j)==7;
                B(i,j)=0.1429;
        elseif A(i)==9&&A(j)==8;
                B(i,j)=0.2;                
        elseif A(i)==1&&A(j)==1/2;
                B(i,j)=0.1304;
        elseif A(i)==1/2&&A(j)==1/3;
                B(i,j)=0.1;
        elseif A(i)==1/3&&A(j)==1/4;
                B(i,j)=0.1215;  
        elseif A(i)==1/4&&A(j)==1/5;
                B(i,j)=0.1304; 
        elseif A(i)==1/5&&A(j)==1/6;
                B(i,j)=0.1346; 
        elseif A(i)==1/6&&A(j)==1/7;
                B(i,j)=0.1370; 
        elseif A(i)==1/7&&A(j)==1/8;
                B(i,j)=0.1385;
        elseif A(i)==1/8&&A(j)==1/9;
                B(i,j)=0.1795; 
        elseif A(i)==1/2&&A(j)==1;
                B(i,j)=0.1304;
        elseif A(i)==1/3&&A(j)==1/2;
                B(i,j)=0.1;
        elseif A(i)==1/4&&A(j)==1/3;
                B(i,j)=0.1215;  
        elseif A(i)==1/5&&A(j)==1/4;
                B(i,j)=0.1304; 
        elseif A(i)==1/6&&A(j)==1/5;
                B(i,j)=0.1346; 
        elseif A(i)==1/7&&A(j)==1/6;
                B(i,j)=0.1370; 
        elseif A(i)==1/8&&A(j)==1/7;
                B(i,j)=0.1385;
        elseif A(i)==1/9&&A(j)==1/8;
                B(i,j)=0.1795;                    
        else
            B(i,j)=0;
        end
    end
end
for i=1:n
    for j=1:n
        C(i,j)=B(i,j);
    end
end
for i=1:n
    C(i,n+1)=(sum(C(i,:))-1);
end
for i=1:n
    C(i,n+2)=C(i,n+1)/19;
end
C(n+1,n+2)=sum(C(1:n,n+2));
for i=1:n
    C(i,n+3)=C(i,n+2)/C(n+1,n+2);
end
AA=A';
BB=zeros(n,3);
for i=1:n
    BB(i,2)=AA(i);
end
for i=1:n
     if BB(i,2)>1&&BB(i,2)<19
        BB(i,1)=BB(i,2)-1;
        BB(i,3)=BB(i,2)+1;
    elseif BB(i,2)==1
        BB(i,3)=BB(i,2)+1;
        BB(i,1)=1/(BB(i,2)+1);
    elseif BB(i,2)==19
        BB(i,3)=BB(i,2);
        BB(i,1)=BB(i,2)-1;
    elseif BB(i,2)==1/19
        BB(i,3)=1/(1/BB(i,2)-1);
        BB(i,1)=BB(i,2);        
     else
         BB(i,1)=1/(1/BB(i,2)+1);
         BB(i,3)=1/(1/BB(i,2)-1);
     end
end
DD=zeros(n+1,3);
for i=1:n
    DD(i,1)=C(i,n+3)*BB(i,1);
    DD(i,2)=C(i,n+3)*BB(i,2);
    DD(i,3)=C(i,n+3)*BB(i,3);
end
DD(n+1,:)=sum(DD(1:n,:));
ANS=((DD(n+1,3)-DD(n+1,1))+(DD(n+1,2)-DD(n+1,1)))/3+DD(n+1,1);
