# Supplementary material for: Continuous Fuzzy Kano Model and Fuzzy AHP Model for Aesthetic Product Design: Case Study of an Electric Scooter
Source: Hindawi journal article supplement (doi:10.1155/2018/4162539), 2018-09-20
Supplement: f1 [file 4162539.f1.zip › New supplementary documentation/SAM/SAM-explanation of formula 1.docx]

This study uses triangular fuzzy numbers to represent expert opinions.

| Fuzzy number | | Semantic value |
| --- | --- | --- |
|  | （1/2,1,2） | of equal importance |
|  | （1,2,3） | Between the same important and slightly important |
|  | （2,3,4） | Slightly important |
|  | （3,4,5） | Between the slightly important and quite important |
|  | （4,5,6） | important |
|  | （5,6,7） | Between important and very important |
|  | （6,7,8） | More important |
|  | （7,8,9） | Between the more important and very important |
|  | （8,9,9） | Extremely important |


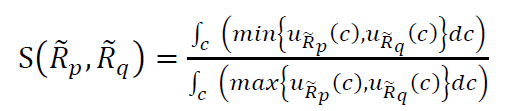


This formula requires the area of the two triangles to overlap (the intersection) and the total area of the two triangles (the union)


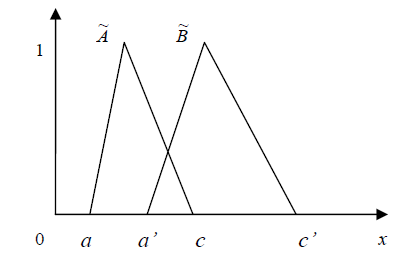


**Suppose there are two triangular fuzzy numbers**
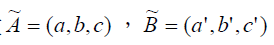
**,Calculate the area of the intersection of two triangles (intersection)**


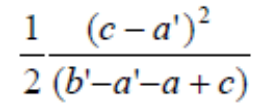


**And the total area of the two triangles (the union) ：**


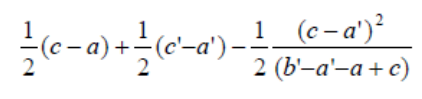


**The degree of recognition of experts p and q on the same factor：**


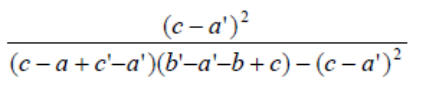


MATLAB code：

A=[1 2 3];

B=[2 3 4];

output1=((A(3)-B(1))^2/(A(3)-A(2)+B(2)-B(1)))/(A(3)-A(1)+B(3)-B(1)-((A(3)-B(1))^2/(A(3)-A(2)+B(2)-B(1))));
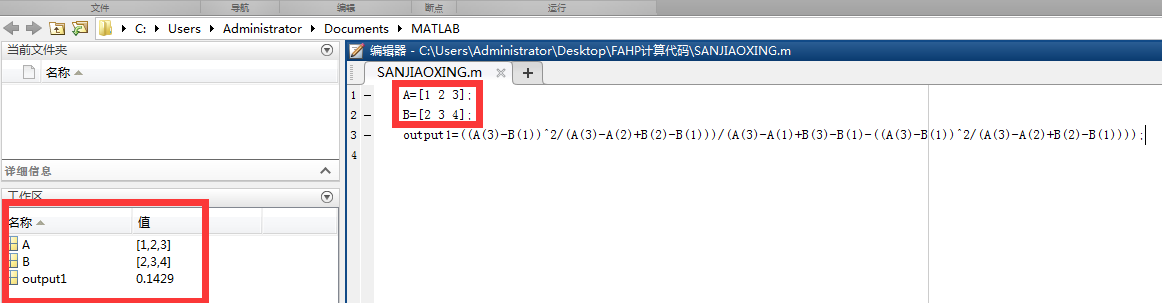


please check the folder“3-Similarity Aggregation Method (SAM)” This document is the result of the calculation of all fuzzy numbers.


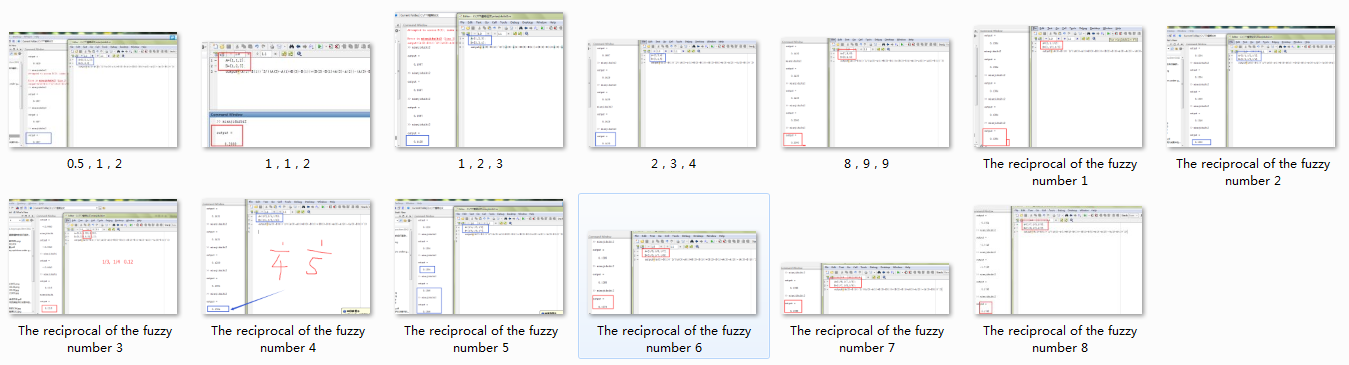


To establish the agreement matrix (AM ) quickly and accurately,We wrote a MATLAB code to express the various possible outcomes of any two fuzzy numbers.

For example, the fuzzy number in the following table, which is the answer of 20 experts to a group of emotional words. The 20 fuzzy numbers are calculated with each other, representing the degree of recognition among 20 experts.

| 7 | 1 | 1/4 | 1 | 5 | 3 | 5 | 1/2 | 1/8 | 2 | 1/2 | 5 | 3 | 2 | 1/2 | 5 | 1/6 | 5 | 6 | 1 |
| --- | --- | --- | --- | --- | --- | --- | --- | --- | --- | --- | --- | --- | --- | --- | --- | --- | --- | --- | --- |

But manual calculation is a waste of time, so the author write code.

n=length(A);

B=zeros(n,n);

C=zeros(n+1,n+3);

for i=1:n

for j=1:n

if A(i)==A(j)

B(i,j)=1;

elseif A(i)==1&&A(j)==2;

B(i,j)=0.1667;

elseif A(i)==2&&A(j)==3;

B(i,j)=0.1429;

elseif A(i)==3&&A(j)==4;

B(i,j)=0.1429;

elseif A(i)==4&&A(j)==5;

B(i,j)=0.1429;

elseif A(i)==5&&A(j)==6;

B(i,j)=0.1429;

elseif A(i)==6&&A(j)==7;

B(i,j)=0.1429;

elseif A(i)==7&&A(j)==8;

B(i,j)=0.1429;

elseif A(i)==8&&A(j)==9;

B(i,j)=0.2;

elseif A(i)==2&&A(j)==1;

B(i,j)=0.1667;

elseif A(i)==3&&A(j)==2;

B(i,j)=0.1429;

elseif A(i)==4&&A(j)==3;

B(i,j)=0.1429;

elseif A(i)==5&&A(j)==4;

B(i,j)=0.1429;

elseif A(i)==6&&A(j)==5;

B(i,j)=0.1429;

elseif A(i)==7&&A(j)==6;

B(i,j)=0.1429;

elseif A(i)==8&&A(j)==7;

B(i,j)=0.1429;

elseif A(i)==9&&A(j)==8;

B(i,j)=0.2;

elseif A(i)==1&&A(j)==1/2;

B(i,j)=0.1304;

elseif A(i)==1/2&&A(j)==1/3;

B(i,j)=0.1;

elseif A(i)==1/3&&A(j)==1/4;

B(i,j)=0.1215;

elseif A(i)==1/4&&A(j)==1/5;

B(i,j)=0.1304;

elseif A(i)==1/5&&A(j)==1/6;

B(i,j)=0.1346;

elseif A(i)==1/6&&A(j)==1/7;

B(i,j)=0.1370;

elseif A(i)==1/7&&A(j)==1/8;

B(i,j)=0.1385;

elseif A(i)==1/8&&A(j)==1/9;

B(i,j)=0.1795;

elseif A(i)==1/2&&A(j)==1;

B(i,j)=0.1304;

elseif A(i)==1/3&&A(j)==1/2;

B(i,j)=0.1;

elseif A(i)==1/4&&A(j)==1/3;

B(i,j)=0.1215;

elseif A(i)==1/5&&A(j)==1/4;

B(i,j)=0.1304;

elseif A(i)==1/6&&A(j)==1/5;

B(i,j)=0.1346;

elseif A(i)==1/7&&A(j)==1/6;

B(i,j)=0.1370;

elseif A(i)==1/8&&A(j)==1/7;

B(i,j)=0.1385;

elseif A(i)==1/9&&A(j)==1/8;

B(i,j)=0.1795;

else

B(i,j)=0;

end

end

end

for i=1:n

for j=1:n

C(i,j)=B(i,j);

end

end

for i=1:n

C(i,n+1)=(sum(C(i,:))-1);

end

for i=1:n

C(i,n+2)=C(i,n+1)/19;

end

C(n+1,n+2)=sum(C(1:n,n+2));

for i=1:n

C(i,n+3)=C(i,n+2)/C(n+1,n+2);

End

The figure below is the agreement matrix (AM ) of 20 experts.
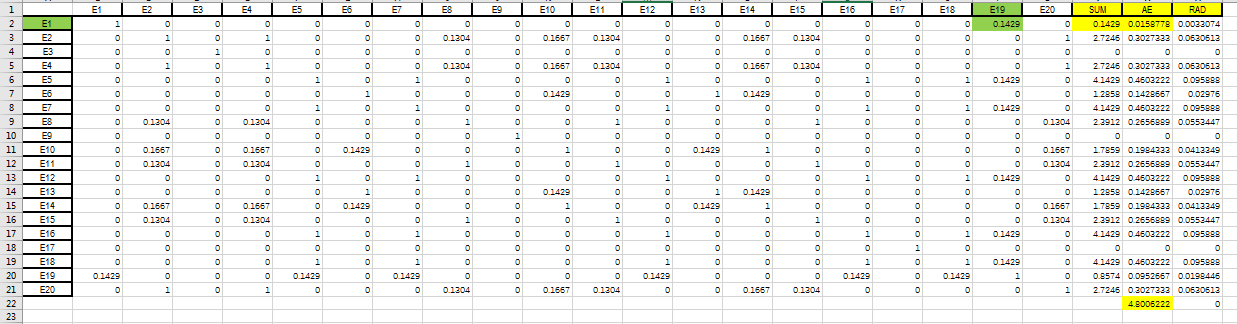


The following is the verification of the cited documents.


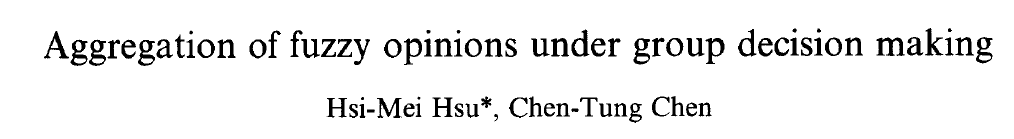


This document uses trapezoidal fuzzy numbers


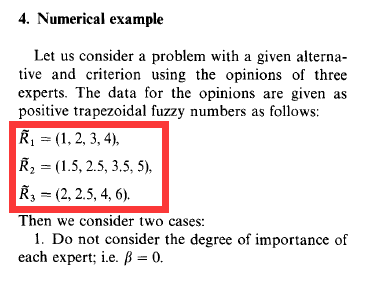


**Use MATLAB to calculate the data in the literature**

MATLAB code：

A=[1 2 3 4];

B=[1.5 2.5 3.5 5];

C=[2 2.5 4 6];

output1=(A(4)-B(1)+A(3)-B(2))/(A(4)-A(1)+A(3)-A(2)+B(4)-B(1)+B(3)-B(2)-A(4)+B(1)-A(3)+B(2));

output2=(A(4)-C(1)+A(3)-C(2))/(A(4)-A(1)+A(3)-A(2)+C(4)-C(1)+C(3)-C(2)-A(4)+C(1)-A(3)+C(2));

output3=(B(4)-C(1)+B(3)-C(2))/(B(4)-B(1)+B(3)-B(2)+C(4)-C(1)+C(3)-C(2)-B(4)+C(1)-B(3)+C(2));

**Calculation results in the literature：**


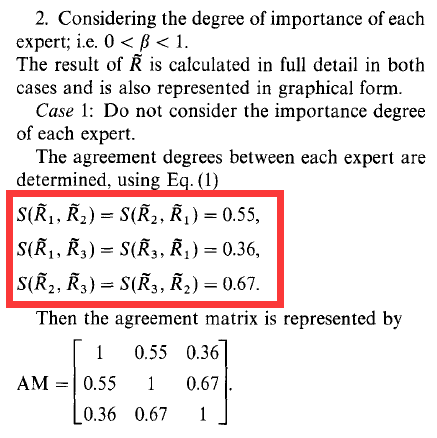


**Use MATLAB to calculate the data in the literature**


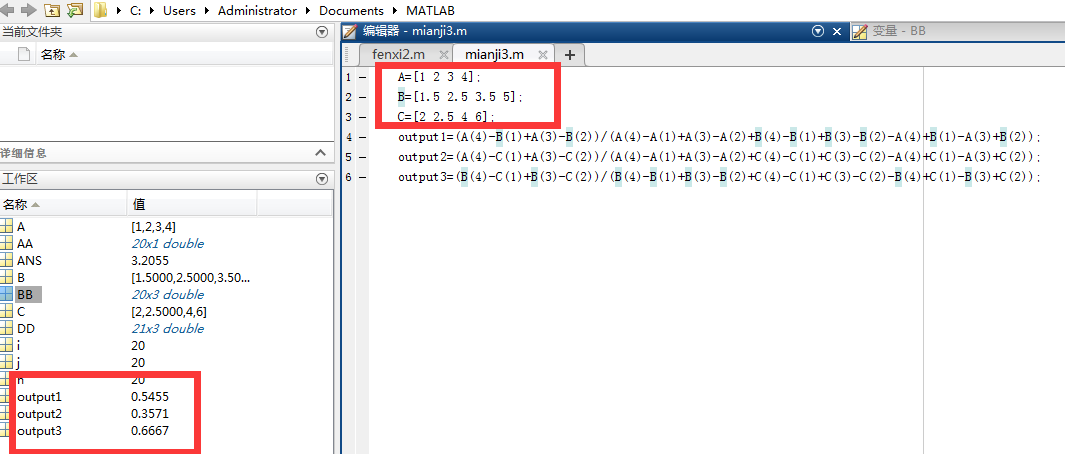


The calculation results are the same as the results of the literature.
