# Supplementary material for: Continuous Fuzzy Kano Model and Fuzzy AHP Model for Aesthetic Product Design: Case Study of an Electric Scooter
Source: Hindawi journal article supplement (doi:10.1155/2018/4162539), 2018-09-20
Supplement: f1 [file 4162539.f1.zip › Supplementary materials/1. EI value calculation/Continuous Fuzzy/C-FKM-FAHP.xlsx]

## Sheet: Sheet1
0.2762	4	1.1048		3.6692		0.301101
0.155	4	0.62		3.6692		0.168974
0.1367	4	0.5468		3.6692		0.149024
0.143	4	0.572		3.6692		0.155892
0.1279	4	0.5116		3.6692		0.139431
0.0785	4	0.314		3.6692		0.0855772
0.0474	0	0		3.6692		0
0.0353	0	0		3.6692		0
		3.6692
