# Supplementary material for: Continuous Fuzzy Kano Model and Fuzzy AHP Model for Aesthetic Product Design: Case Study of an Electric Scooter
Source: Hindawi journal article supplement (doi:10.1155/2018/4162539), 2018-09-20
Supplement: f1 [file 4162539.f1.zip › Supplementary materials/1. EI value calculation/Continuous Fuzzy/EI-Fashionable.xlsx]

## Sheet: Sheet1
Participant 1	0.7	0.5887	0.41209
Participant 2	0.7	0.05	0.035
Participant 3	0.6	0.025	0.015
Participant 4	0.6	0.15	0.09
Participant 5	0.6	0.0537	0.03222
Participant 6	0.6	0.0693	0.04158
Participant 7	0.8	0.645	0.516
Participant 8	0.8	0.4437	0.35496
Participant 9	0.2	0.0275	0.0055
Participant 10	0.9	0.3487	0.31383
Participant 11	0.6	0.0562	0.03372
Participant 12	0.6	0.2112	0.12672
Participant 13	0.6	0.15	0.09
Participant 14	0.4	0.0562	0.02248
Participant 15	0.8	0.5037	0.40296
Participant 16	0.8	0.1763	0.14104
Participant 17	0.7	0.4612	0.32284
Participant 18	0.7	0.0587	0.04109
Participant 19	0.5	0.4263	0.21315
Participant 20	0.8	0.025	0.02
Participant 21	0.8	0.5463	0.43704
Participant 22	0.7	0.1327	0.09289
Participant 23	0.6	0.015	0.009
Participant 24	0.8	0.5037	0.40296
Participant 25	0.7	0.3337	0.23359
Participant 26	0.6	0.0682	0.04092
Participant 27	0.7	0.0688	0.04816
Participant 28	0.8	0.5062	0.40496
Participant 29	0.7	0.11	0.077
Participant 30	0.9	0.4	0.36
Participant 31	0.3	0.075	0.0225
Participant 32	0.8	0.4437	0.35496
Participant 33	0.6	-0.2325	-0.1395
Participant 34	0.4	-0.05	-0.02
Participant 35	0.3	-0.0075	-0.00225
Participant 36	0.6	0.0575	0.0345
Participant 37	0.7	0.1763	0.12341
Participant 38	0.9	0.25	0.225
Participant 39	0.9	0.0825	0.07425
Participant 40	0.8	0.075	0.06
Participant 41	0.6	0.1688	0.10128
Participant 42	0.4	0.5	0.2
Participant 43	0.4	-0.0345	-0.0138
Participant 44	0.7	0.5463	0.38241
Participant 45	0.7	0.05	0.035
Participant 46	0.8	0.3463	0.27704
Participant 47	0.4	0.05	0.02
Participant 48	0.6	0.0562	0.03372
Participant 49	0.9	0.7	0.63
Participant 50	0.8	0.62	0.496
Participant 51	0.8	0.075	0.06
Participant 52	0.7	0.3487	0.24409
Participant 53	0.7	0.3487	0.24409
Participant 54	0.7	0.25	0.175
Participant 55	0.8	0.1425	0.114
Participant 56	0.8	0.5037	0.40296
Participant 57	0.7	0.0875	0.06125
Participant 58	0.6	0.035	0.021
Participant 59	0.8	0.3337	0.26696
Participant 60	0.7	0.6525	0.45675
Participant 61	0.5	0.035	0.0175
Participant 62	0.5	0	0
Participant 63	0.7	0.05	0.035
Participant 64	0.5	0.05	0.025
Participant 65	0.7	0.1425	0.09975
Participant 66	0.7	0.1875	0.13125
		EI	0.160391		EI-Fashionable
