# Supplementary material for: Continuous Fuzzy Kano Model and Fuzzy AHP Model for Aesthetic Product Design: Case Study of an Electric Scooter
Source: Hindawi journal article supplement (doi:10.1155/2018/4162539), 2018-09-20
Supplement: f1 [file 4162539.f1.zip › Supplementary materials/1. EI value calculation/Continuous Fuzzy/EI-Feel of science and technology.xlsx]

## Sheet: Sheet1
Participant 1	0.6	0.1327	0.07962
Participant 2	0.9	0.36	0.324
Participant 3	0.9	0.5	0.45
Participant 4	0.7	0.11	0.077
Participant 5	0.3	0.0537	0.01611
Participant 6	0.5	0.175	0.0875
Participant 7	0.8	0.3413	0.27304
Participant 8	0.7	0.0562	0.03934
Participant 9	0.3	0	0
Participant 10	0.7	0.2112	0.14784
Participant 11	0.6	0.0562	0.03372
Participant 12	0.6	0.1763	0.10578
Participant 13	0.7	0.19	0.133
Participant 14	0.5	0.0562	0.0281
Participant 15	0.3	0.1875	0.05625
Participant 16	0.5	0.035	0.0175
Participant 17	0.7	0.1198	0.08386
Participant 18	0.8	0.5037	0.40296
Participant 19	0.4	0.3487	0.13948
Participant 20	0.7	0.1875	0.13125
Participant 21	0.9	0.5037	0.45333
Participant 22	0.7	0.2197	0.15379
Participant 23	0.5	0.05	0.025
Participant 24	0.5	0.2325	0.11625
Participant 25	0.8	0.4875	0.39
Participant 26	0.7	0.3413	0.23891
Participant 27	0.8	0.1763	0.14104
Participant 28	0.7	-0.0345	-0.02415
Participant 29	0.8	0.4612	0.36896
Participant 30	0.6	0.285	0.171
Participant 31	0.5	0.0682	0.0341
Participant 32	0.8	0.3	0.24
Participant 33	0.5	0.0562	0.0281
Participant 34	0.6	0.1875	0.1125
Participant 35	0.8	0.0682	0.05456
Participant 36	0.8	0.3	0.24
Participant 37	0.5	0.0537	0.02685
Participant 38	0.4	0	0
Participant 39	0.5	0.05	0.025
Participant 40	0.8	0.075	0.06
Participant 41	0.7	0.1198	0.08386
Participant 42	0.6	0.2325	0.1395
Participant 43	0.8	0.4612	0.36896
Participant 44	0.4	-0.1395	-0.0558
Participant 45	0.9	0.5	0.45
Participant 46	0.7	0.0625	0.04375
Participant 47	0.6	0.3	0.18
Participant 48	0.7	0.075	0.0525
Participant 49	0.9	0.7	0.63
Participant 50	0.8	0.5463	0.43704
Participant 51	0.7	0.4	0.28
Participant 52	0.9	0.5	0.45
Participant 53	0.9	0.5	0.45
Participant 54	0.6	0.1	0.06
Participant 55	0.8	0.25	0.2
Participant 56	0.7	0.4612	0.32284
Participant 57	0.5	0.07	0.035
Participant 58	0.6	0.035	0.021
Participant 59	0.6	0.0587	0.03522
Participant 60	0.7	0.015	0.0105
Participant 61	0.4	0.0675	0.027
Participant 62	0.7	0.15	0.105
Participant 63	0.9	0.5	0.45
Participant 64	0.6	0.0675	0.0405
Participant 65	0.8	0.4	0.32
Participant 66	0.8	0.3	0.24
		EI	0.164522		EI-Feel of science and technology
