# Supplementary material for: Continuous Fuzzy Kano Model and Fuzzy AHP Model for Aesthetic Product Design: Case Study of an Electric Scooter
Source: Hindawi journal article supplement (doi:10.1155/2018/4162539), 2018-09-20
Supplement: f1 [file 4162539.f1.zip › Supplementary materials/1. EI value calculation/Continuous Fuzzy/EI-Graceful and smooth.xlsx]

## Sheet: Sheet1
Participant 1	0.7	0.1425	0.09975
Participant 2	0.7	0.1198	0.08386
Participant 3	0.5	0.0575	0.02875
Participant 4	0.9	0.3487	0.31383
Participant 5	0.7	0.1262	0.08834
Participant 6	0.8	0.5887	0.47096
Participant 7	0.5	0.0825	0.04125
Participant 8	0.8	0.3413	0.27304
Participant 9	0.7	0.0137	0.00959
Participant 10	0.8	0.4263	0.34104
Participant 11	0.7	0.0682	0.04774
Participant 12	0.6	0.2112	0.12672
Participant 13	0.8	0.2027	0.16216
Participant 14	0.4	0.0562	0.02248
Participant 15	0.7	0.4437	0.31059
Participant 16	0.6	0.035	0.021
Participant 17	0.8	0.3337	0.26696
Participant 18	0.2	0.4263	0.08526
Participant 19	0.9	0.5187	0.46683
Participant 20	0.8	0.3	0.24
Participant 21	0.7	0.3413	0.23891
Participant 22	0.9	0.2112	0.19008
Participant 23	0.5	0.035	0.0175
Participant 24	0.6	0.2027	0.12162
Participant 25	0.8	0.44	0.352
Participant 26	0.7	0.4263	0.29841
Participant 27	0.7	0.0675	0.04725
Participant 28	0.9	0.78	0.702
Participant 29	0.8	0.5037	0.40296
Participant 30	0.9	0.44	0.396
Participant 31	0.8	0.4612	0.36896
Participant 32	0.6	0	0
Participant 33	0.8	0.95	0.76
Participant 34	0.7	0	0
Participant 35	0.7	0.4612	0.32284
Participant 36	0.8	0.3487	0.27896
Participant 37	0.7	0.3337	0.23359
Participant 38	0.6	0.075	0.045
Participant 39	0.6	-0.05	-0.03
Participant 40	0.8	0.075	0.06
Participant 41	0.5	0.0437	0.02185
Participant 42	0.6	0	0
Participant 43	0.7	0.3463	0.24241
Participant 44	0.3	0	0
Participant 45	0.6	0.5187	0.31122
Participant 46	0.6	0.0382	0.02292
Participant 47	0.5	0.0625	0.03125
Participant 48	0.6	0.025	0.015
Participant 49	0.9	0.62	0.558
Participant 50	0.7	0.11	0.077
Participant 51	0.5	0	0
Participant 52	0.6	0.075	0.045
Participant 53	0.6	0.075	0.045
Participant 54	0.7	0.1688	0.11816
Participant 55	0.6	0.075	0.045
Participant 56	0.7	0.3463	0.24241
Participant 57	0.5	0	0
Participant 58	0.9	0.3413	0.30717
Participant 59	0.7	0.0688	0.04816
Participant 60	0.7	0.1327	0.09289
Participant 61	0.5	0.0825	0.04125
Participant 62	0.6	0	0
Participant 63	0.5	0	0
Participant 64	0.5	0.0105	0.00525
Participant 65	0.6	0.0575	0.0345
Participant 66	0.8	0.4263	0.34104
		EI	0.165935		EI-Graceful and smooth
