# Supplementary material for: Continuous Fuzzy Kano Model and Fuzzy AHP Model for Aesthetic Product Design: Case Study of an Electric Scooter
Source: Hindawi journal article supplement (doi:10.1155/2018/4162539), 2018-09-20
Supplement: f1 [file 4162539.f1.zip › Supplementary materials/1. EI value calculation/Continuous Fuzzy/EI-Light and exquisite.xlsx]

## Sheet: Sheet1
Participant 1	0.5	0.095	0.0475
Participant 2	0.3	0.11	0.033
Participant 3	0.8	-0.0175	-0.014
Participant 4	0.6	0.0222	0.01332
Participant 5	0.6	0.11	0.066
Participant 6	0.6	0.3558	0.21348
Participant 7	0.7	0.2112	0.14784
Participant 8	0.4	0.1327	0.05308
Participant 9	0.6	-0.0125	-0.0075
Participant 10	0.6	0.11	0.066
Participant 11	0.5	-0.0192	-0.0096
Participant 12	0.6	0.2197	0.13182
Participant 13	0.6	0.095	0.057
Participant 14	0.5	-0.0025	-0.00125
Participant 15	0.5	0.0137	0.00685
Participant 16	0.7	0.0625	0.04375
Participant 17	0.6	0.3413	0.20478
Participant 18	0.4	-0.0192	-0.00768
Participant 19	0.5	0.3367	0.16835
Participant 20	0.6	0.0925	0.0555
Participant 21	0.7	0.3413	0.23891
Participant 22	0.5	0.0587	0.02935
Participant 23	0.7	0.4612	0.32284
Participant 24	0.6	0.11	0.066
Participant 25	0.6	0.1688	0.10128
Participant 26	0.7	0.4	0.28
Participant 27	0.6	-0.0192	-0.01152
Participant 28	0.5	-0.015	-0.0075
Participant 29	0.9	0.5037	0.45333
Participant 30	0.7	0.285	0.1995
Participant 31	0.8	0.0688	0.05504
Participant 32	0.7	0.1688	0.11816
Participant 33	0.7	0.78	0.546
Participant 34	0.7	-0.0344	-0.02408
Participant 35	0.43	0.3337	0.143491
Participant 36	0.5	0.0625	0.03125
Participant 37	0.8	0.4437	0.35496
Participant 38	0.2	-0.0464	-0.00928
Participant 39	0.7	0.505	0.3535
Participant 40	0.8	0.075	0.06
Participant 41	0.7	0.44	0.308
Participant 42	0.8	0.3	0.24
Participant 43	0.6	0.0682	0.04092
Participant 44	0.8	0.5037	0.40296
Participant 45	0.7	0.075	0.0525
Participant 46	0.5	0.0688	0.0344
Participant 47	0.5	0.4	0.2
Participant 48	0.4	0	0
Participant 49	0.8	0.62	0.496
Participant 50	0.5	0	0
Participant 51	0.5	0.25	0.125
Participant 52	0.7	0.3	0.21
Participant 53	0.7	0.3	0.21
Participant 54	0.9	0.2325	0.20925
Participant 55	0.8	0.11	0.088
Participant 56	0.8	0.4263	0.34104
Participant 57	0.5	0.075	0.0375
Participant 58	0.7	0.3413	0.23891
Participant 59	0.6	0.0493	0.02958
Participant 60	0.7	0.0437	0.03059
Participant 61	0.3	0.035	0.0105
Participant 62	0.4	-0.4	-0.16
Participant 63	0.7	0.05	0.035
Participant 64	0.5	0.0682	0.0341
Participant 65	0.6	0.05	0.03
Participant 66	0.8	0.1875	0.15
		EI	0.120662		Light and exquisite
