# Supplementary material for: Continuous Fuzzy Kano Model and Fuzzy AHP Model for Aesthetic Product Design: Case Study of an Electric Scooter
Source: Hindawi journal article supplement (doi:10.1155/2018/4162539), 2018-09-20
Supplement: f1 [file 4162539.f1.zip › Supplementary materials/1. EI value calculation/Continuous Fuzzy/EI-Mellow and soft.xlsx]

## Sheet: Sheet1
Participant 1	0.3	-0.0192	-0.00576
Participant 2	0.5	-0.0075	-0.00375
Participant 3	0.6	0.0688	0.04128
Participant 4	0.3	0.1763	0.05289
Participant 5	0.4	0	0
Participant 6	0.6	0.015	0.009
Participant 7	0.6	-0.0025	-0.0015
Participant 8	0.7	0.3337	0.23359
Participant 9	0.5	0.0063	0.00315
Participant 10	0.8	0.135	0.108
Participant 11	0.6	0.0063	0.00378
Participant 12	0.7	0.3487	0.24409
Participant 13	0.8	0.1688	0.13504
Participant 14	0.3	0.0105	0.00315
Participant 15	0.9	0.5	0.45
Participant 16	0.6	0.05	0.03
Participant 17	0.4	0.0537	0.02148
Participant 18	0.8	0.5037	0.40296
Participant 19	0.2	-0.1733	-0.03466
Participant 20	0.8	0.0625	0.05
Participant 21	0.8	0.4263	0.34104
Participant 22	0.6	0.0587	0.03522
Participant 23	0.5	0.025	0.0125
Participant 24	0.6	0.11	0.066
Participant 25	0.3	0.03	0.009
Participant 26	0.4	0.0437	0.01748
Participant 27	0.6	0.0437	0.02622
Participant 28	0.7	0.0825	0.05775
Participant 29	0.8	0.4875	0.39
Participant 30	0.7	0.095	0.0665
Participant 31	0.3	0.075	0.0225
Participant 32	0.6	0	0
Participant 33	0.5	0.0693	0.03465
Participant 34	0.3	0.015	0.0045
Participant 35	0.6	0.0682	0.04092
Participant 36	0.5	-0.015	-0.0075
Participant 37	0.8	0.4612	0.36896
Participant 38	0.8	0.075	0.06
Participant 39	0.8	0.97	0.776
Participant 40	0.5	0.015	0.0075
Participant 41	0.8	0.4	0.32
Participant 42	0.4	0	0
Participant 43	0.6	-0.0269	-0.01614
Participant 44	0.3	0	0
Participant 45	0.7	0.1875	0.13125
Participant 46	0.5	0.015	0.0075
Participant 47	0.5	0	0
Participant 48	0.5	0	0
Participant 49	0.5	0	0
Participant 50	0.8	0.5463	0.43704
Participant 51	0.6	0.075	0.045
Participant 52	0.9	0.5	0.45
Participant 53	0.9	0.5	0.45
Participant 54	0.2	0.44	0.088
Participant 55	0.7	0.075	0.0525
Participant 56	0.8	0.0587	0.04696
Participant 57	0.4	0	0
Participant 58	0.7	0.1327	0.09289
Participant 59	0.6	0.0562	0.03372
Participant 60	0.7	0.0137	0.00959
Participant 61	0.4	0	0
Participant 62	0.2	-0.025	-0.005
Participant 63	0.5	0	0
Participant 64	0.5	0.03	0.015
Participant 65	0.4	0.015	0.006
Participant 66	0.4	0	0
		EI	0.0944892		EI-Mellow and soft
