# Supplementary material for: Continuous Fuzzy Kano Model and Fuzzy AHP Model for Aesthetic Product Design: Case Study of an Electric Scooter
Source: Hindawi journal article supplement (doi:10.1155/2018/4162539), 2018-09-20
Supplement: f1 [file 4162539.f1.zip › Supplementary materials/1. EI value calculation/Continuous Fuzzy/EI-Simple and modern.xlsx]

## Sheet: Sheet1
	weight values	SN	EI		clear clc close all A=[0.7 0.3 0 0 0]; B=[0 0 0 0.5 0.5]; D=A'*B; C=[0,0.200,0.250,0.300,0.500; -0.100,0,0.050,0.075,0.900; -0.125,-0.025,0,0.100,1.000; -0.150,-0.038,-0.050,0,0.800; -0.250,-0.450,-0.500,-0.400,0]; Sum_CD=sum(sum(C.*D)); disp(Sum_CD);	Continuous Fuzzy Kano Questionnaire Table
Participant 2	0.7	0.0675	0.04725		This is the code for the operation of SN in MATLAB
Participant 3	0.7	0.5463	0.38241
Participant 4	0.7	0.2112	0.14784
Participant 5	0.7	0.095	0.0665
Participant 6	0.4	0.3487	0.13948
Participant 7	0.5	0.165	0.0825
Participant 8	0.6	0.3558	0.21348
Participant 9	0.4	0.5463	0.21852
Participant 10	0.8	0.44	0.352
Participant 11	0.6	0.0925	0.0555
Participant 12	0.7	0.19	0.133
Participant 13	0.8	0.36	0.288
Participant 14	0.5	0.5313	0.26565
Participant 15	0.9	0.5	0.45
Participant 16	0.6	0.1262	0.07572
Participant 17	0.6	0.4437	0.26622
Participant 18	0.8	0.5037	0.40296
Participant 19	0.2	0.5187	0.10374
Participant 20	0.8	0.4437	0.35496
Participant 21	0.8	0.5037	0.40296
Participant 22	0.9	0.5463	0.49167
Participant 23	0.8	0.3337	0.26696
Participant 24	0.7	0.2112	0.14784
Participant 25	0.8	0.44	0.352
Participant 26	0.8	0.3487	0.27896
Participant 27	0.8	0.2197	0.17576
Participant 28	0.7	0.93	0.651
Participant 29	0.8	0.5037	0.40296
Participant 30	0.5	0.285	0.1425
Participant 31	0.9	0.5	0.45
Participant 32	0.6	0.1688	0.10128
Participant 33	0.5	0.1	0.05
Participant 34	0.7	0.9	0.63
Participant 35	0.8	0.44	0.352
Participant 36	0.8	0.1875	0.15
Participant 37	0.7	0.1763	0.12341
Participant 38	0.5	0.1	0.05
Participant 39	0.5	0	0
Participant 40	0.8	0.4875	0.39
Participant 41	0.6	0.4	0.24
Participant 42	0.6	-0.025	-0.015
Participant 43	0.3	0.025	0.0075
Participant 44	0.5	0.679	0.3395
Participant 45	0.7	0.9	0.63
Participant 46	0.4	-0.015	-0.006
Participant 47	0.5	0.05	0.025
Participant 48	0.5	0.0562	0.0281
Participant 49	0.7	0.5187	0.36309
Participant 50	0.7	0.55	0.385
Participant 51	0.8	0.3	0.24
Participant 52	0.8	0.3337	0.26696
Participant 53	0.8	0.3337	0.26696
Participant 54	0.8	0.4263	0.34104
Participant 55	0.8	0.3225	0.258
Participant 56	0.5	0.05	0.025
Participant 57	0.9	0.3	0.27
Participant 58	0.7	0.1262	0.08834
Participant 59	0.7	0.0493	0.03451
Participant 60	0.6	0.2325	0.1395
Participant 61	0.5	0.1688	0.0844
Participant 62	0.3	0	0
Participant 63	0.9	0.5	0.45
Participant 64	0.6	0.0445	0.0267
Participant 65	0.6	0.0575	0.0345
Participant 66	0.8	0.1875	0.15
		EI	0.220433
					Simple and modern
