# Supplementary material for: Continuous Fuzzy Kano Model and Fuzzy AHP Model for Aesthetic Product Design: Case Study of an Electric Scooter
Source: Hindawi journal article supplement (doi:10.1155/2018/4162539), 2018-09-20
Supplement: f1 [file 4162539.f1.zip › Supplementary materials/1. EI value calculation/Continuous Fuzzy/EI-Special and cool.xlsx]

## Sheet: Sheet1
Participant 1	0.5	0.0222	0.0111
Participant 2	0.6	0.015	0.009
Participant 3	0.5	-0.0345	-0.01725
Participant 4	0.7	0.075	0.0525
Participant 5	0.8	0.1327	0.10616
Participant 6	0.5	0.015	0.0075
Participant 7	0.5	0.3337	0.16685
Participant 8	0.6	0.03	0.018
Participant 9	0.1	-0.0155	-0.00155
Participant 10	0.9	0.4	0.36
Participant 11	0.5	0.0493	0.02465
Participant 12	0.5	0.2027	0.10135
Participant 13	0.6	0.0562	0.03372
Participant 14	0.4	0.0063	0.00252
Participant 15	0.2	-0.1733	-0.03466
Participant 16	0.7	0.1688	0.11816
Participant 17	0.8	0.4263	0.34104
Participant 18	0.6	0.0682	0.04092
Participant 19	0.6	0.5463	0.32778
Participant 20	0.8	0.9	0.72
Participant 21	0.6	0.1327	0.07962
Participant 22	0.2	0	0
Participant 23	0.5	0.0382	0.0191
Participant 24	0.7	0.1613	0.11291
Participant 25	0.5	0	0
Participant 26	0.6	0.2112	0.12672
Participant 27	0.6	0.0562	0.03372
Participant 28	0.7	-0.0347	-0.02429
Participant 29	0.7	0.0825	0.05775
Participant 30	0.6	0.285	0.171
Participant 31	0.9	0.5	0.45
Participant 32	0.9	0.3	0.27
Participant 33	0.7	0.78	0.546
Participant 34	0.6	0	0
Participant 35	0.5	0.0493	0.02465
Participant 36	0.5	0	0
Participant 37	0.5	0.0275	0.01375
Participant 38	0.7	0.9	0.63
Participant 39	0.5	0.015	0.0075
Participant 40	0.9	0.5	0.45
Participant 41	0.5	0.1262	0.0631
Participant 42	0.2	0	0
Participant 43	0.8	0.5062	0.40496
Participant 44	0.5	0.3463	0.17315
Participant 45	0.9	0.5	0.45
Participant 46	0.5	0.0537	0.02685
Participant 47	0.7	0.5	0.35
Participant 48	0.6	0.0625	0.0375
Participant 49	0.9	0.7	0.63
Participant 50	0.7	0.4612	0.32284
Participant 51	0.6	0.05	0.03
Participant 52	0.8	0.3	0.24
Participant 53	0.8	0.3	0.24
Participant 54	0.8	0.3	0.24
Participant 55	0.8	0.3337	0.26696
Participant 56	0.9	0.62	0.558
Participant 57	0.5	0.44	0.22
Participant 58	0.8	0.015	0.012
Participant 59	0.8	0.3413	0.27304
Participant 60	0.6	0.1763	0.10578
Participant 61	0.7	0.15	0.105
Participant 62	0.8	0.05	0.04
Participant 63	0.5	0	0
Participant 64	0.9	0.44	0.396
Participant 65	0.7	0.3413	0.23891
Participant 66	0.6	0.5313	0.31878
		EI	0.168168		EI-Special and cool
