# Supplementary material for: Continuous Fuzzy Kano Model and Fuzzy AHP Model for Aesthetic Product Design: Case Study of an Electric Scooter
Source: Hindawi journal article supplement (doi:10.1155/2018/4162539), 2018-09-20
Supplement: f1 [file 4162539.f1.zip › Supplementary materials/1. EI value calculation/Continuous Fuzzy/EI-Sports and racing.xlsx]

## Sheet: Sheet1
Participant 1	0.4	-0.0269	-0.01076
Participant 2	0.4	-0.465	-0.186
Participant 3	0.2	-0.45	-0.09
Participant 4	0.4	-0.0192	-0.00768
Participant 5	0.5	-0.0075	-0.00375
Participant 6	0.6	0.0693	0.04158
Participant 7	0.3	0.279	0.0837
Participant 8	0.7	0.3337	0.23359
Participant 9	0.2	-0.0175	-0.0035
Participant 10	0.7	0.05	0.035
Participant 11	0.7	0.0562	0.03934
Participant 12	0.3	0.0493	0.01479
Participant 13	0.5	0.025	0.0125
Participant 14	0.6	0.445	0.267
Participant 15	0.7	0.0382	0.02674
Participant 16	0.3	-0.0345	-0.01035
Participant 17	0.6	0.0537	0.03222
Participant 18	0.5	0.0562	0.0281
Participant 19	0.7	0.5187	0.36309
Participant 20	0.8	0.9	0.72
Participant 21	0.5	0.0587	0.02935
Participant 22	0.4	0.05	0.02
Participant 23	0.4	-0.0344	-0.01376
Participant 24	0.4	-0.035	-0.014
Participant 25	0.3	-0.0296	-0.00888
Participant 26	0.4	0.0875	0.035
Participant 27	0.7	0.075	0.0525
Participant 28	0.5	-0.0345	-0.01725
Participant 29	0.7	0.1198	0.08386
Participant 30	0.2	-0.2945	-0.0589
Participant 31	0.2	-0.338	-0.0676
Participant 32	0.5	-0.275	-0.1375
Participant 33	0.3	-0.485	-0.1455
Participant 34	0.5	-0.0289	-0.01445
Participant 35	0.6	-0.025	-0.015
Participant 36	0.5	0.15	0.075
Participant 37	0.5	-0.0025	-0.00125
Participant 38	0.8	0.25	0.2
Participant 39	0.5	0.97	0.485
Participant 40	0.5	0.015	0.0075
Participant 41	0.5	-0.1733	-0.08665
Participant 42	0.3	-0.45	-0.135
Participant 43	0.4	-0.0296	-0.01184
Participant 44	0.4	-0.3534	-0.14136
Participant 45	0.4	-0.038	-0.0152
Participant 46	0.7	0.0575	0.04025
Participant 47	0.5	0.025	0.0125
Participant 48	0.5	0	0
Participant 49	0.5	0	0
Participant 50	0.5	0	0
Participant 51	0.5	0.1	0.05
Participant 52	0.6	-0.0075	-0.0045
Participant 53	0.6	-0.0075	-0.0045
Participant 54	0.5	0.5	0.25
Participant 55	0.5	0	0
Participant 56	0.9	0.3367	0.30303
Participant 57	0.9	0.5	0.45
Participant 58	0.6	0.305	0.183
Participant 59	0.6	-0.1686	-0.10116
Participant 60	0.5	-0.0155	-0.00775
Participant 61	0.6	0.075	0.045
Participant 62	0.3	0	0
Participant 63	0.9	0.5	0.45
Participant 64	0.2	-0.1655	-0.0331
Participant 65	0.6	0.1763	0.10578
Participant 66	0.7	0.075	0.0525
							Sports and racing
		EI	0.0527383
