# Supplementary material for: Continuous Fuzzy Kano Model and Fuzzy AHP Model for Aesthetic Product Design: Case Study of an Electric Scooter
Source: Hindawi journal article supplement (doi:10.1155/2018/4162539), 2018-09-20

In the paper, the design of the survey questionnaire, Collect data through questionnaires


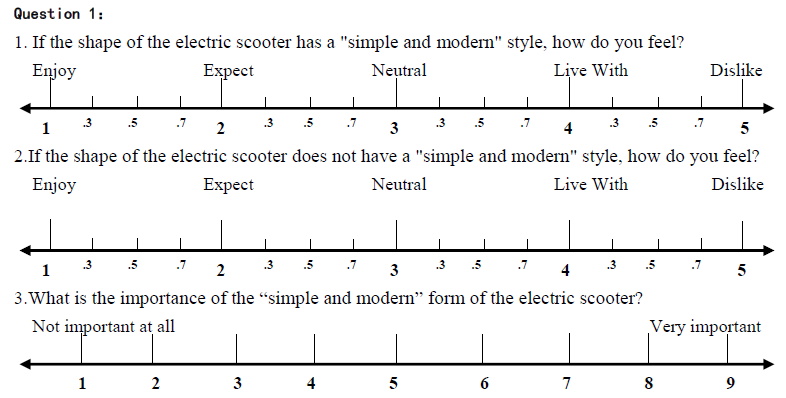


Here is a screenshot to illustrate the steps of the calculation:


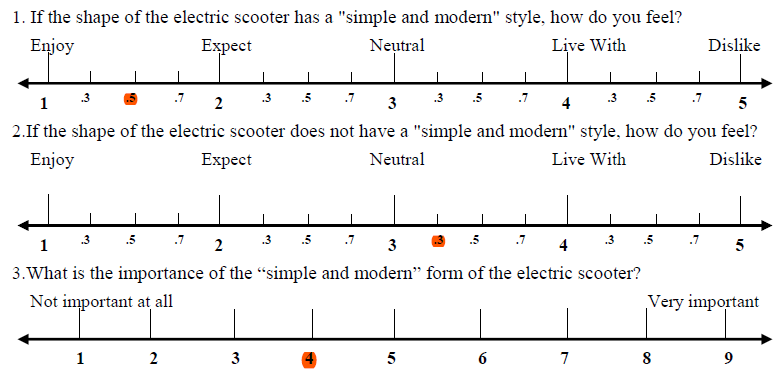


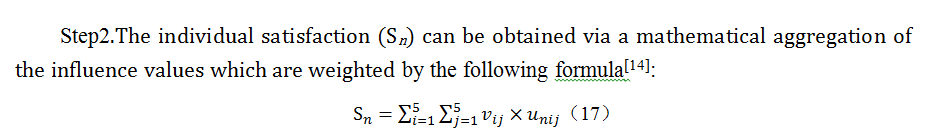


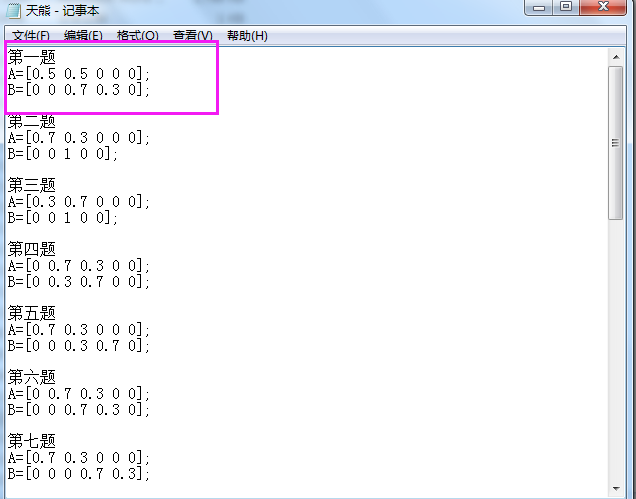


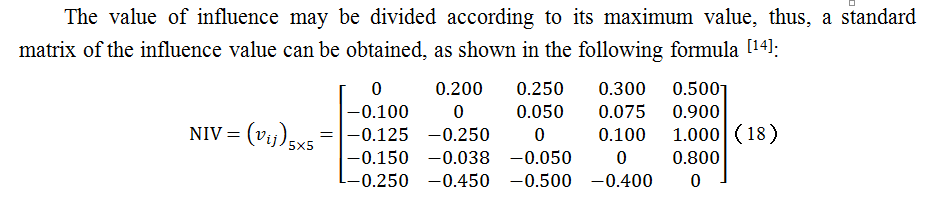


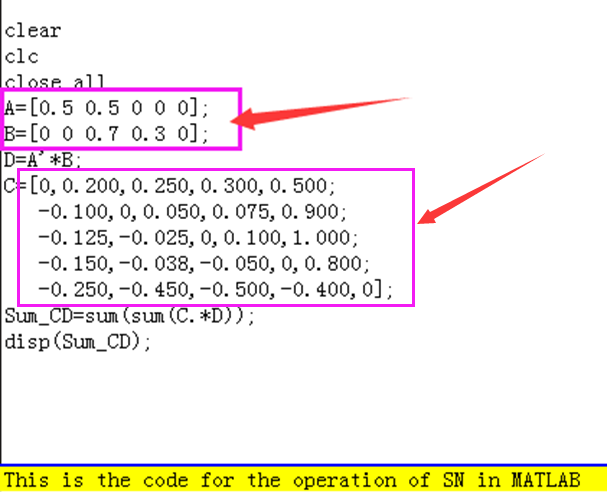


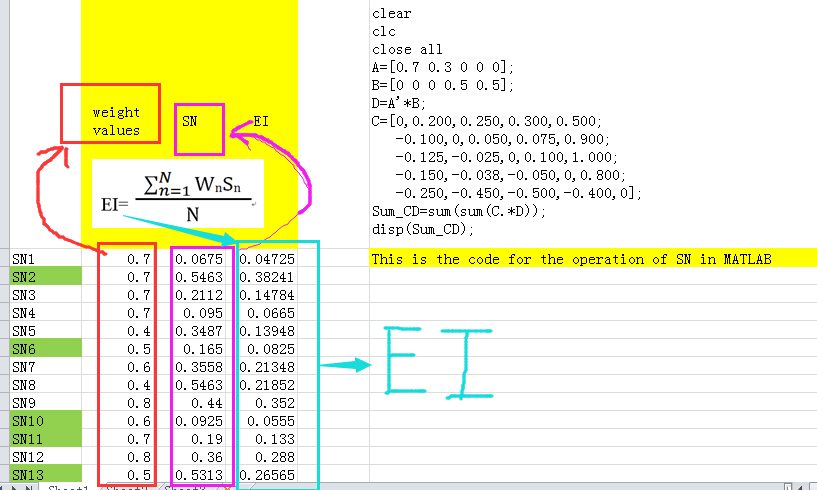

Supplement: f1 [file 4162539.f1.zip › Supplementary materials/1. EI value calculation/Description of the calculation process.docx]
