# Supplementary material for: Continuous Fuzzy Kano Model and Fuzzy AHP Model for Aesthetic Product Design: Case Study of an Electric Scooter
Source: Hindawi journal article supplement (doi:10.1155/2018/4162539), 2018-09-20
Supplement: f1 [file 4162539.f1.zip › Supplementary materials/1. EI value calculation/Description of the calculation process.xlsx]

## Sheet: Sheet1
	weight values	SN	EI		clear clc close all A=[0.7 0.3 0 0 0]; B=[0 0 0 0.5 0.5]; D=A'*B; C=[0,0.200,0.250,0.300,0.500; -0.100,0,0.050,0.075,0.900; -0.125,-0.025,0,0.100,1.000; -0.150,-0.038,-0.050,0,0.800; -0.250,-0.450,-0.500,-0.400,0]; Sum_CD=sum(sum(C.*D)); disp(Sum_CD);	Continuous Fuzzy Kano Questionnaire Table
SN1	0.7	0.0675	0.04725		This is the code for the operation of SN in MATLAB
SN2	0.7	0.5463	0.38241
SN3	0.7	0.2112	0.14784
SN4	0.7	0.095	0.0665
SN5	0.4	0.3487	0.13948
SN6	0.5	0.165	0.0825
SN7	0.6	0.3558	0.21348
SN8	0.4	0.5463	0.21852
SN9	0.8	0.44	0.352
SN10	0.6	0.0925	0.0555
SN11	0.7	0.19	0.133
SN12	0.8	0.36	0.288
SN13	0.5	0.5313	0.26565
SN14	0.9	0.5	0.45
SN15	0.6	0.1262	0.07572
SN16	0.6	0.4437	0.26622
SN17	0.8	0.5037	0.40296
SN18	0.2	0.5187	0.10374
SN19	0.8	0.4437	0.35496
Sn20	0.8	0.5037	0.40296
SN21	0.9	0.5463	0.49167
SN22	0.8	0.3337	0.26696
SN23	0.7	0.2112	0.14784
24	0.8	0.44	0.352
25	0.8	0.3487	0.27896
SN26	0.8	0.2197	0.17576
27	0.7	0.93	0.651
28	0.8	0.5037	0.40296
SN29	0.5	0.285	0.1425
SN30	0.9	0.5	0.45
SN31	0.6	0.1688	0.10128
SN32	0.5	0.1	0.05
SN33	0.7	0.9	0.63
SN34	0.8	0.44	0.352
SN35	0.8	0.1875	0.15
SN36	0.7	0.1763	0.12341
SN37	0.5	0.1	0.05
SN38	0.5	0	0
SN39	0.8	0.4875	0.39
SN40	0.6	0.4	0.24
SN41	0.6	-0.025	-0.015
SN42	0.3	0.025	0.0075
SN43	0.5	0.679	0.3395
SN44	0.7	0.9	0.63
45	0.4	-0.015	-0.006
SN46	0.5	0.05	0.025
SN47	0.5	0.0562	0.0281
SN48	0.7	0.5187	0.36309
SN49	0.7	0.55	0.385
SN50	0.8	0.3	0.24
SN51	0.8	0.3337	0.26696
SN52	0.8	0.3337	0.26696
SN53	0.8	0.4263	0.34104
SN54	0.8	0.3225	0.258
SN55	0.5	0.05	0.025
SN56	0.9	0.3	0.27
SN57	0.7	0.1262	0.08834
sn58佳	0.7	0.0493	0.03451
SN59	0.6	0.2325	0.1395
60	0.5	0.1688	0.0844
61	0.3	0	0
sn62	0.9	0.5	0.45
SN63	0.6	0.0445	0.0267
SN64	0.6	0.0575	0.0345
sn65	0.8	0.1875	0.15
			0.220433
					Simple and modern
