# Supplementary material for: Continuous Fuzzy Kano Model and Fuzzy AHP Model for Aesthetic Product Design: Case Study of an Electric Scooter
Source: Hindawi journal article supplement (doi:10.1155/2018/4162539), 2018-09-20
Supplement: f1 [file 4162539.f1.zip › Supplementary materials/2. SAM+FAHP/5-Fuzzy Pairwise Comparison Matrix of Kansei Words.txt]

EXCEL file : Fuzzy Pairwise Comparison Matrix of Kansei Words

Description:

Each numerical value in the following table is calculated by MATLAB. 
The researchers used these values to construct a fuzzy matrix. 
The other half value of the matrix is the reciprocal of each value. 
Through the establishment of this fuzzy matrix, according to the corresponding Mathematical formulas, 
researchers can calculate, Geometric mean, Weights, AW, ��Max and so on . 

Below is the MATLAB calculation code for FAHP

A=A';
n=length(A);
B=1./tril(A,-1)';
B(B==inf)=0;
F=A+B;
F=F';
C=zeros(n+1,n+4);
C(1:n,1:n)=F;
for i=1:n
    C(i,n+1)=prod(C(i,1:n))^(1/length(C(i,1:n)));
end
C(n+1,n+1)=sum(C(1:n,n+1));
for i=1:n
    C(i,n+2)=C(i,n+1)/C(n+1,n+1);
end
D=F;
E=D*C(1:n,n+2);
for i=1:n
    C(i,n+3)=E(i);
end
for i=1:n
    C(i,n+4)=C(i,n+3)/C(i,n+2);
end
C(n+1,n+4)=sum(C(1:n,n+4))/n;
