# Supplementary material for: Continuous Fuzzy Kano Model and Fuzzy AHP Model for Aesthetic Product Design: Case Study of an Electric Scooter
Source: Hindawi journal article supplement (doi:10.1155/2018/4162539), 2018-09-20
Supplement: f1 [file 4162539.f1.zip › Supplementary materials/2. SAM+FAHP/5-Fuzzy Pairwise Comparison Matrix of Kansei Words.xlsx]

## Sheet: Sheet1
												middle									Geometric mean	Weights	AW	λ
2.38848	3.15552	4.0725			3.15552	1.88437	3.09144	2.743	2.51981	4.335	5.28998		1	3.15552	1.88437	3.09144	2.743	2.51981	4.335	5.28998	2.71053	0.279698	2.39259	8.55419
1.14136	1.88437	2.79107				1.23365	1.78434	1.49799	2.71337	3.21594	3.03236		0.316905	1	1.23365	1.78434	1.49799	2.71337	3.21594	3.03236	1.51431	0.15626	1.31714	8.42917
2.33171	3.09144	3.90251					1.29654	1.24733	1.63476	2.92177	3.13751		0.53068	0.810601	1	1.29654	1.24733	1.63476	2.92177	3.13751	1.34048	0.138324	1.12099	8.1041
2.0025	2.743	3.54669						2.42065	3.10184	3.60364	3.80089		0.323474	0.560431	0.771281	1	2.42065	3.10184	3.60364	3.80089	1.39547	0.143997	1.26301	8.77106
1.58303	2.51981	3.4658							3.71201	3.84502	4.35114		0.364564	0.667562	0.801712	0.413112	1	3.71201	3.84502	4.35114	1.22302	0.126203	1.10772	8.77735
3.35224	4.335	5.335								2.78449	4.12759		0.396855	0.368545	0.611709	0.32239	0.269396	1	2.78449	4.12759	0.739367	0.0762949	0.675724	8.85675
4.29423	5.28998	6.13708									2.27009		0.23068	0.310951	0.342258	0.277497	0.260076	0.359132	1	2.27009	0.441534	0.0455617	0.382609	8.39762
0.752665	1.23365	2.05682											0.189036	0.329776	0.318724	0.263096	0.229825	0.242272	0.440511	1	0.326207	0.0336612	0.287596	8.54387
1.25072	1.78434	2.43018																			9.69091		λMax	8.55426
0.99215	1.49799	2.07582										left									Geometric mean	Weights	AW	λ
1.86554	2.71337	3.61189			2.38848	1.14136	2.33171	2.0025	1.58303	3.35224	4.29423		1	2.38848	1.14136	2.33171	2.0025	1.58303	3.35224	4.29423	2.03148	0.228172	1.90941	8.36831
2.26632	3.21594	4.21594				0.752665	1.25072	0.99215	1.86554	2.26632	2.20126		0.418677	1	0.752665	1.25072	0.99215	1.86554	2.26632	2.20126	1.17524	0.132001	1.08901	8.25003
2.20126	3.03236	3.89701					0.90924	0.780719	1.06584	1.92845	2.16509		0.876145	1.32861	1	0.90924	0.780719	1.06584	1.92845	2.16509	1.17677	0.132172	1.08575	8.21465
0.90924	1.29654	1.80752						1.63917	2.26387	2.65158	2.86607		0.428871	0.799539	1.09982	1	1.63917	2.26387	2.65158	2.86607	1.34383	0.150936	1.26444	8.37728
0.780719	1.24733	1.95739							2.8188	2.95207	3.3584		0.499376	1.00791	1.28087	0.610066	1	2.8188	2.95207	3.3584	1.34937	0.151559	1.27169	8.39074
1.06584	1.63476	2.2852								1.99126	3.23355		0.6317	0.536038	0.93823	0.441721	0.35476	1	1.99126	3.23355	0.867438	0.097429	0.829707	8.51602
1.92845	2.92177	3.92177									1.66285		0.298308	0.441244	0.51855	0.377134	0.338746	0.502195	1	1.66285	0.540479	0.0607056	0.49094	8.08724
2.16509	3.13751	4.13751											0.232871	0.454284	0.461874	0.348909	0.297761	0.309257	0.601378	1	0.418675	0.0470248	0.385601	8.19996
1.63917	2.42065	3.24144																			8.90328		λMax	8.30053
2.26387	3.10184	4.00531										right									Geometric mean	Weights	AW	λ
2.65158	3.60364	4.56119			4.0725	2.79107	3.90251	3.54669	3.4658	5.335	6.13708		1	4.0725	2.79107	3.90251	3.54669	3.4658	5.335	6.13708	3.39987	0.320851	2.88935	9.00527
2.86607	3.80089	4.80089				2.05682	2.43018	2.07582	3.61189	4.21594	3.89701		0.245549	1	2.05682	2.43018	2.07582	3.61189	4.21594	3.89701	1.87258	0.176718	1.56094	8.83292
2.8188	3.71201	4.63036					1.80752	1.95739	2.2852	3.92177	4.13751		0.358285	0.486188	1	1.80752	1.95739	2.2852	3.92177	4.13751	1.47866	0.139543	1.17639	8.43033
2.95207	3.84502	4.7498						3.24144	4.00531	4.56119	4.80089		0.256246	0.411492	0.553245	1	3.24144	4.00531	4.56119	4.80089	1.42057	0.134062	1.24184	9.26322
3.3584	4.35114	5.35002							4.63036	4.7498	5.35002		0.281953	0.481736	0.510885	0.308505	1	4.63036	4.7498	5.35002	1.12241	0.105924	0.985748	9.30621
1.99126	2.78449	3.68051								3.68051	4.87317		0.288534	0.276863	0.437598	0.249668	0.215966	1	3.68051	4.87317	0.654826	0.0617969	0.575808	9.31775
3.23355	4.12759	4.87317									3.00748		0.187441	0.237195	0.254987	0.219241	0.210535	0.271702	1	3.00748	0.379209	0.0357865	0.318055	8.88757
1.66285	2.27009	3.00748											0.162944	0.256607	0.241691	0.208295	0.186915	0.205205	0.332504	1	0.268293	0.0253192	0.228977	9.04359
																					10.5964		λMax	9.01086
