# Supplementary material for: Continuous Fuzzy Kano Model and Fuzzy AHP Model for Aesthetic Product Design: Case Study of an Electric Scooter
Source: Hindawi journal article supplement (doi:10.1155/2018/4162539), 2018-09-20
Supplement: f1 [file 4162539.f1.zip › Supplementary materials/2. SAM+FAHP/6-Defuzzification.xlsx]

## Sheet: Sheet1
	middle	left	middle minus left		right minus left	middle minus left	SUM	Divide 3	H Divide I	left	SUM
λMax	8.55426	8.30053	0.253735		0.71033	0.253735	0.964064	3	0.321355	8.30053	8.62188
													Priorities
Weights	0.279698	0.228172	0.0515263		0.0926787	0.0515263	0.144205	3	0.0480683	0.228172	0.27624	Simple and modern	1
Weights	0.15626	0.132001	0.0242594		0.0447173	0.0242594	0.0689767	3	0.0229922	0.132001	0.154993	Graceful and smooth	2
Weights	0.138324	0.132172	0.00615161		0.00737074	0.00615161	0.0135224	3	0.00450745	0.132172	0.13668	Fashionable	4
Weights	0.143997	0.150936	-0.00693919		-0.0168748	-0.00693919	-0.023814	3	-0.00793799	0.150936	0.142998	Special and cool	3
Weights	0.126203	0.151559	-0.0253565		-0.0456353	-0.0253565	-0.0709918	3	-0.0236639	0.151559	0.127895	science and technology	5
Weights	0.0762949	0.097429	-0.0211341		-0.0356321	-0.0211341	-0.0567662	3	-0.0189221	0.097429	0.0785069	Light and exquisite	6
Weights	0.0455617	0.0607056	-0.0151439		-0.024919	-0.0151439	-0.0400629	3	-0.0133543	0.0607056	0.0473512	Mellow and soft	7
Weights	0.0336612	0.0470248	-0.0133636		-0.0217056	-0.0133636	-0.0350692	3	-0.0116897	0.0470248	0.035335	Sports and racing	8
	middle	left			right minus left	middle minus left	SUM	Divide 3		left
