# Supplementary material for: Continuous Fuzzy Kano Model and Fuzzy AHP Model for Aesthetic Product Design: Case Study of an Electric Scooter
Source: Hindawi journal article supplement (doi:10.1155/2018/4162539), 2018-09-20
Supplement: f1 [file 4162539.f1.zip › Supplementary materials/3.QTT-I calculation/calculation tool ,calculation results.xls]

## Sheet: Sheet1
数量化 I 類
							dependent variable
A1	A2	A3	A4	A5			Y1
4	1	7	1		1		4.53846
2	2	4	3		2		2.76923
4	1	6	3		3		3.84615
3	3	4	2		4		2.34615
2	2	8	4		5		3.92308
1	4	2	2		6		2
4	3	4	3		7		2.96154
2	4	4	4		8		3.88462
2	2	4	4		9		4.5
4	1	5	1		10		4
4	4	1	3		11		3.11538
4	1	4	1		12		3.65385
2	2	7	4		13		3.69231
1	2	2	2		14		3.12
4	2	6	1		15		3.34615
3	3	3	2		16		2.69231
3	3	2	2		17		2.46154
4	1	5	1		18		3.96154
2	4	4	4		19		2.76923
4	4	5	4		20		2.81818
2	2	1	3		21		3.63636
4	4	6	2		22		3.30769
																		Category	grade	Grade score	Partial correlation coefficient
																		X1	1	-0.807245	0.898598
																			2	0.357923
																			3	-1.51299
																			4	0.364801
																		X2	1	0.936011	0.861521
																			2	-0.0211465
																			3	0.164284
																			4	-0.864861
																		X3	1	0.935265	0.66605
																			2	0.0255877
																			3	0.256357
																			4	-0.0897969
																			5	-0.378415
																			6	0.0230912
																			7	-0.120407
																			8	-0.268286
																		X4	1	-0.3544	0.777229
																			2	0.450853
																			3	-0.811557
																			4	0.520778
																		Constant term		3.33381
																		Recorrelation coefficient= .92200699177886
																		Coefficient of decision= .850096892889102
