# Supplementary material for: Continuous Fuzzy Kano Model and Fuzzy AHP Model for Aesthetic Product Design: Case Study of an Electric Scooter
Source: Hindawi journal article supplement (doi:10.1155/2018/4162539), 2018-09-20
Supplement: f1 [file 4162539.f1.zip › Supplementary materials/3.QTT-I calculation/Data Analysis by QTT-I.xlsx]

## Sheet: Sheet1
A1	A2	A3	A4	A5	Sample number		Y1
4	1	7	1		1		4.53846
2	2	4	3		2		2.76923
4	1	6	3		3		3.84615
3	3	4	2		4		2.34615
2	2	8	4		5		3.92308
1	4	2	2		6		2
4	3	4	3		7		2.96154
2	4	4	4		8		3.88462
2	2	4	4		9		4.5
4	1	5	1		10		4
4	4	1	3		11		3.11538
4	1	4	1		12		3.65385
2	2	7	4		13		3.69231
1	2	2	2		14		3.12
4	2	6	1		15		3.34615
3	3	3	2		16		2.69231
3	3	2	2		17		2.46154
4	1	5	1		18		3.96154
2	4	4	4		19		2.76923
4	4	5	4		20		2.81818
2	2	1	3		21		3.63636
4	4	6	2		22		3.30769
	Independent variable						dependent variable
