# Supplementary material for: Continuous Fuzzy Kano Model and Fuzzy AHP Model for Aesthetic Product Design: Case Study of an Electric Scooter
Source: Hindawi journal article supplement (doi:10.1155/2018/4162539), 2018-09-20
Supplement: f1 [file 4162539.f1.zip › Supplementary materials/3.QTT-I calculation/Quantitative Theory I Calculation Process Description.docx]

Quantitative theory I analysis is a kind of multiple regression analysis, The data in the paper:

| Sample | independent variable | | | | | | | | | | | | | | | dependent variable |
| --- | --- | --- | --- | --- | --- | --- | --- | --- | --- | --- | --- | --- | --- | --- | --- | --- |
| number | A1 | | | | A2 | | | | A3 | | | A4 | | | | Simple and modern |
| A11 | A12 | A13 | A14 | A21 | A22 | A23 | A24 | A31 | ... | A38 | A41 | A42 | A43 | A44 | average score |
| 1 | 0 | 0 | 0 | 1 | 1 | 0 | 0 | 0 | 0 | ... | 0 | 1 | 0 | 0 | 0 | 4.5385 |
| 2 | 0 | 1 | 0 | 0 | 0 | 1 | 0 | 0 | 0 | ... | 0 | 0 | 0 | 1 | 0 | 2.7692 |
| 3 | 0 | 0 | 0 | 1 | 1 | 0 | 0 | 0 | 0 | ... | 0 | 0 | 0 | 1 | 0 | 3.8462 |
| 4 | 0 | 0 | 1 | 0 | 0 | 0 | 1 | 0 | 0 | ... | 0 | 0 | 1 | 0 | 0 | 2.3462 |
| 5 | 0 | 1 | 0 | 0 | 0 | 1 | 0 | 0 | 0 | ... | 1 | 0 | 0 | 0 | 1 | 3.9231 |
| 6 | 1 | 0 | 0 | 0 | 0 | 0 | 0 | 1 | 0 | ... | 0 | 0 | 1 | 0 | 0 | 2.0000 |
| 7 | 0 | 0 | 0 | 1 | 0 | 0 | 1 | 0 | 0 | ... | 0 | 0 | 0 | 1 | 0 | 2.9615 |
| 8 | 0 | 0 | 0 | 1 | 0 | 0 | 0 | 1 | 0 | ... | 0 | 0 | 0 | 0 | 1 | 3.8846 |
|  |  |  |  |  |  |  |  |  |  |  |  |  |  |  |  |  |
| 15 | 0 | 0 | 0 | 1 | 0 | 1 | 0 | 0 | 0 |  | 0 | 1 | 0 | 0 | 0 | 3.3462 |
| 16 | 0 | 0 | 1 | 0 | 0 | 0 | 1 | 0 | 0 |  | 0 | 0 | 1 | 0 | 0 | 2.6923 |
| 17 | 0 | 0 | 1 | 0 | 0 | 0 | 1 | 0 | 0 |  | 0 | 0 | 1 | 0 | 0 | 2.4615 |
| 18 | 0 | 0 | 0 | 1 | 1 | 0 | 0 | 0 | 0 |  | 0 | 1 | 0 | 0 | 0 | 3.9615 |
| 19 | 0 | 1 | 0 | 0 | 0 | 0 | 0 | 1 | 0 |  | 0 | 0 | 0 | 0 | 1 | 2.7692 |
| 20 | 0 | 0 | 0 | 1 | 0 | 0 | 0 | 1 | 0 |  | 0 | 0 | 0 | 0 | 1 | 2.8182 |
| 21 | 0 | 1 | 0 | 0 | 0 | 1 | 0 | 0 | 1 |  | 0 | 0 | 0 | 1 | 0 | 3.6364 |
| 22 | 0 | 0 | 0 | 1 | 0 | 0 | 0 | 1 | 0 |  | 0 | 0 | 1 | 0 | 0 | 3.3077 |

All data See text, Data Analysis by QTT-I, All the survey results are entered into a matrix and the analysis is performed using a quantification theory type I calculation tool.( http://aoki2.si.gunma-u.ac.jp/lecture/Qt/), (<http://aoki2.si.gunma-u.ac.jp/BlackBox/BlackBox.html>),

the researchers adopted the QTT-I calculation tool (VBA tool by Professor Shigenobu AOKI, Japan) for the analysis.

The calculation tool and the results of the calculation please see the file.


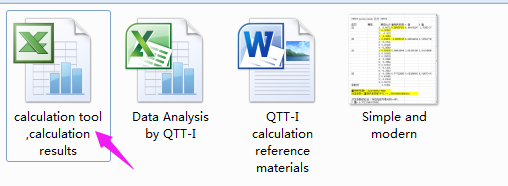


1. the researchers adopted the QTT-I calculation tool (VBA tool by Professor Shigenobu AOKI, Japan) for the analysis. When the researchers input data, the input method of 0 and 1 is changed to 12345678. For example, the category of headlights, there are 8 kinds in the research paper, and the headlights of each electric vehicle sample are different. The number represents the type of headlight for this sample. This is just the difference in the way the input data is, and the calculation process is not affected.

2. The data in the left column of the table is the independent variable, and the right side is the dependent variable.


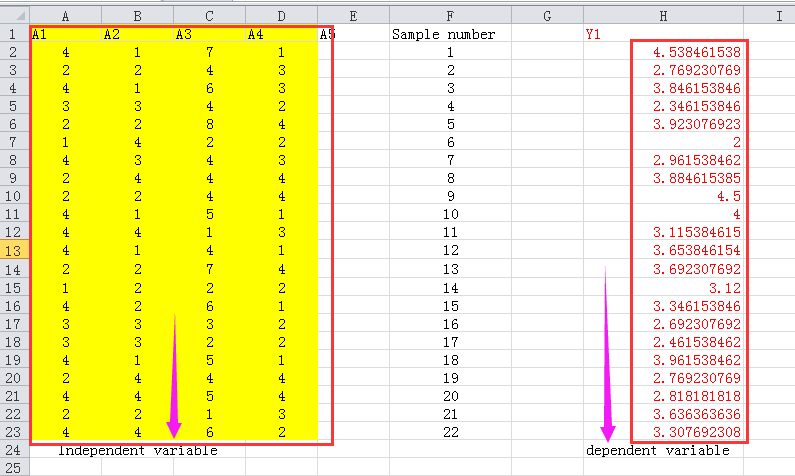


dependent variable

The following questionnaire is the questionnaire of sample 1, 22 samples are investigated in the same way to obtain data.By the following questionnaire, the authors can obtain a simple and modern average of 22 samples, which is the dependent variable.


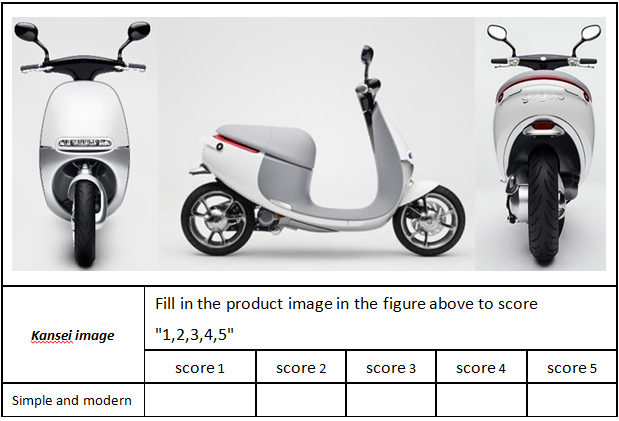


The following is the introduction of quantitative theory I:

The quantification theory proposed by Lichi Mio is a branch of multivariate statistics. It is used to establish the functional relationship between a group of qualitative variables and a group of quantitative variables.

To analyze the approximate functional relationship between a certain objective variable and other every qualitative project group that may select the dummy variable of 0 or 1 as the explanatory variable, the multivariate regression analysis was used to determine the influence of each explanatory variable upon the objective variable.

Each explanatory variable consisted of several categories and may be chosen to establish the regression formula, assuming that all samples were mandatory in each item and only one of them is selected.

By performing a multivariate regression analysis, a mathematical model for the variables is established, and the prediction of the independent variable y can be realized:

|  |
| --- |

where *yi*is the predicted values, depend on the undetermined coefficient of category k under item j..is a random error of the sample.

Multiple Correlation Coefficient and Partial Correlation Coefficient are two important statistics which is used to evaluate the prediction accuracy and the contribution of each item to the prediction, respectively.Multiple Correlation Coefficient, which should be calculated by formula (2)

The coefficient of determination (the square of the multiple correlation coefficient) can also be used to represent the modeling accuracy, which presents the interpretation amount of the total variation and is an important indicator to measure whether the forecasting ability of the model and the regression equation are effective or not.

In the product image design, Partial Correlation Coefficient is especially important, according to whose value, the contribution of each design item to the product perceptual vocabulary can be concluded. The bigger the value is, the bigger the contribution is. In order to calculate Partial Correlation Coefficient, each item can be viewed as a variable. Formula should be seen as the quantitative data of the *i* sample on the *j* item. According to this, the phase between item and item, item and Dependent Variable can be calculated.

（）
