# Supplementary material for: Continuous Fuzzy Kano Model and Fuzzy AHP Model for Aesthetic Product Design: Case Study of an Electric Scooter
Source: Hindawi journal article supplement (doi:10.1155/2018/4162539), 2018-09-20

| number | sample | Outline of the front panel | Side trend line | Modelling of the headlight | Rear modeling features |
| --- | --- | --- | --- | --- | --- |
| 1 | 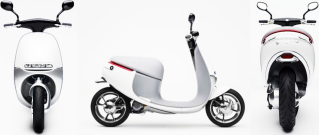 | A14 | A21 | A37 | A41 |

The table below is a sample of the Independent variable input

A14/ A21/ A37/ A41 The modelling category of this sample corresponds to the following table:


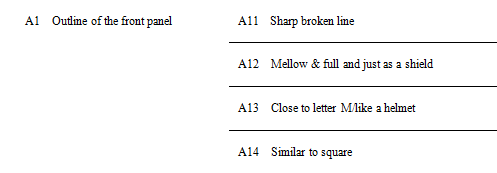

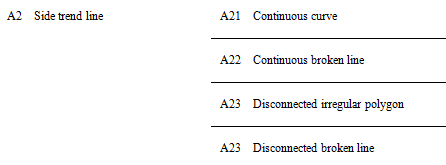


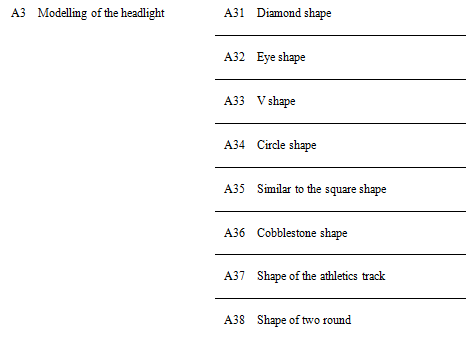

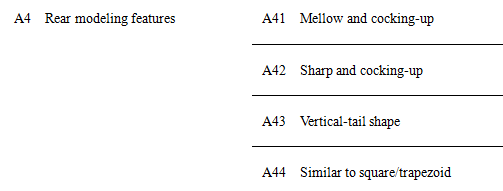


A14/ A21/ A37/ A41, Enter the following form


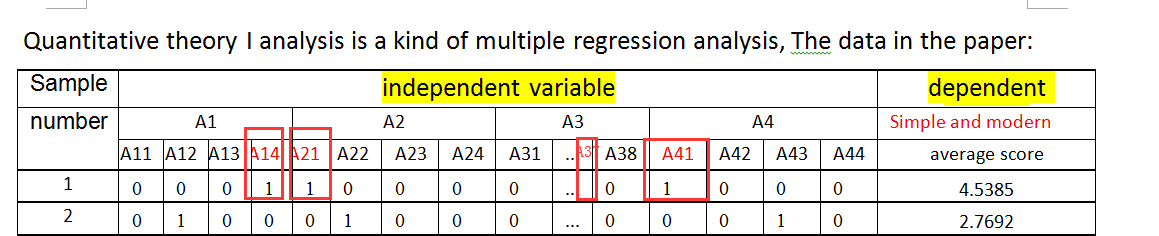


The format of the dummy variables, 1 and 0, is converted into the format of the quantification theory I calculation tool, Finally execute the calculation command, Get the result of the calculation.


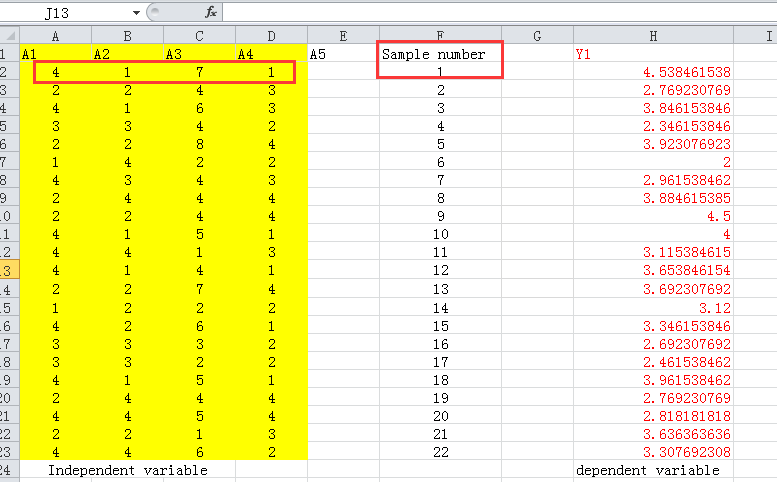

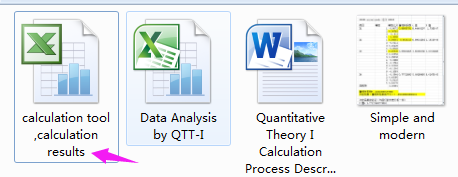

Supplement: f1 [file 4162539.f1.zip › Supplementary materials/3.QTT-I calculation/Sample of the Independent variable input.docx]
