# Supplementary material for: Continuous Fuzzy Kano Model and Fuzzy AHP Model for Aesthetic Product Design: Case Study of an Electric Scooter
Source: Hindawi journal article supplement (doi:10.1155/2018/4162539), 2018-09-20
Supplement: f1 [file 4162539.f1.zip › Supplementary materials/list with a concise description .txt]

1. EI value calculation data

description: This file contains description of the calculation process and data

2. SAM + FAHP calculation data

description:The source of the data in the paper's table and the program code used to calculate

3.QTT-I calculation

There are three documents, one of the documents is EI value calculation data,.The author uses the MATLAB tool and Excel.this file contains description of the calculation process and the source of the table in the paper. Another document contains an author who conducted a questionnaire survey of EV developers and researchers.The author uses the MATLAB tool to calculate and then establish a pair of matrices,and then calculate the fuzzy weight value.The initial files for these series of calculations are included in the file.The paper's table contains the phased results.The third document is QTT-I calculation.
