# Supplementary figures and images for: Continuous Fuzzy Kano Model and Fuzzy AHP Model for Aesthetic Product Design: Case Study of an Electric Scooter
Source: Hindawi journal article supplement (doi:10.1155/2018/4162539), 2018-09-20

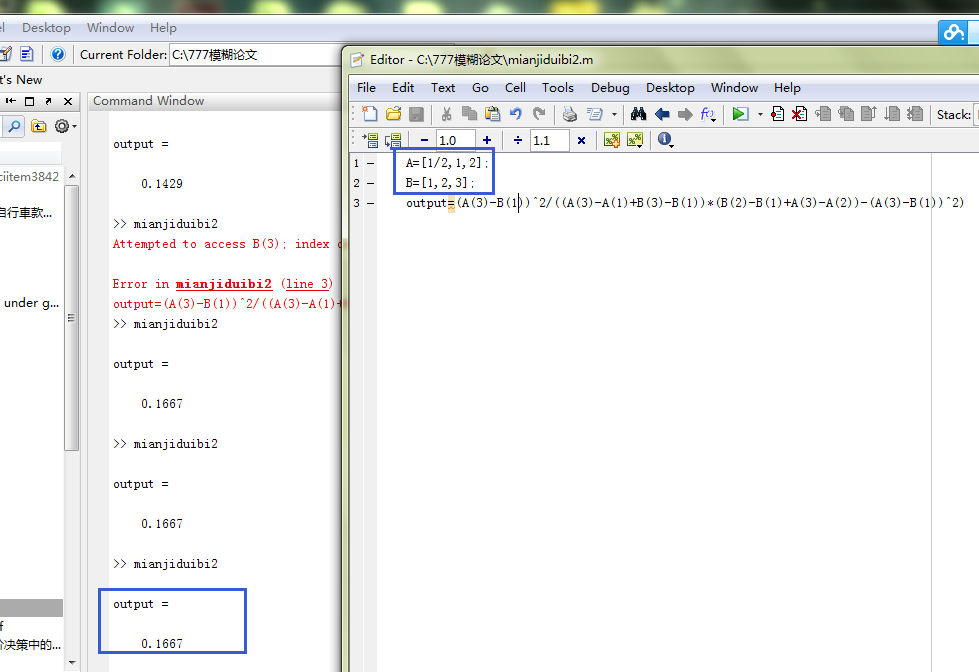

Supplement: f1 [file 4162539.f1.zip › Supplementary materials/2. SAM+FAHP/3-Similarity Aggregation Method (SAM)/0.5ú1⁄41ú1⁄42.png]

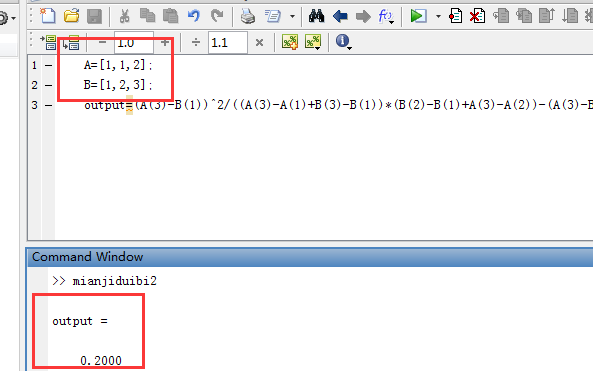

Supplement: f1 [file 4162539.f1.zip › Supplementary materials/2. SAM+FAHP/3-Similarity Aggregation Method (SAM)/1ú1⁄41ú1⁄42.png]

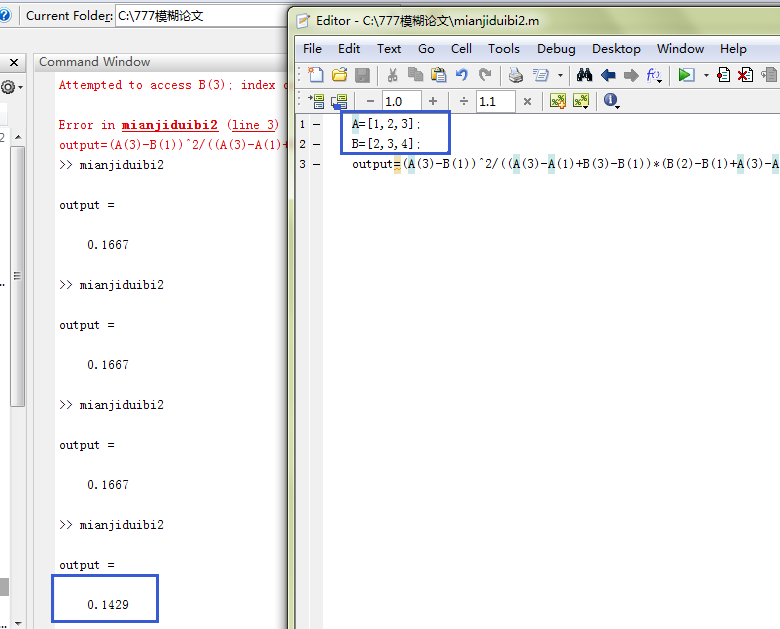

Supplement: f1 [file 4162539.f1.zip › Supplementary materials/2. SAM+FAHP/3-Similarity Aggregation Method (SAM)/1ú1⁄42ú1⁄43.png]

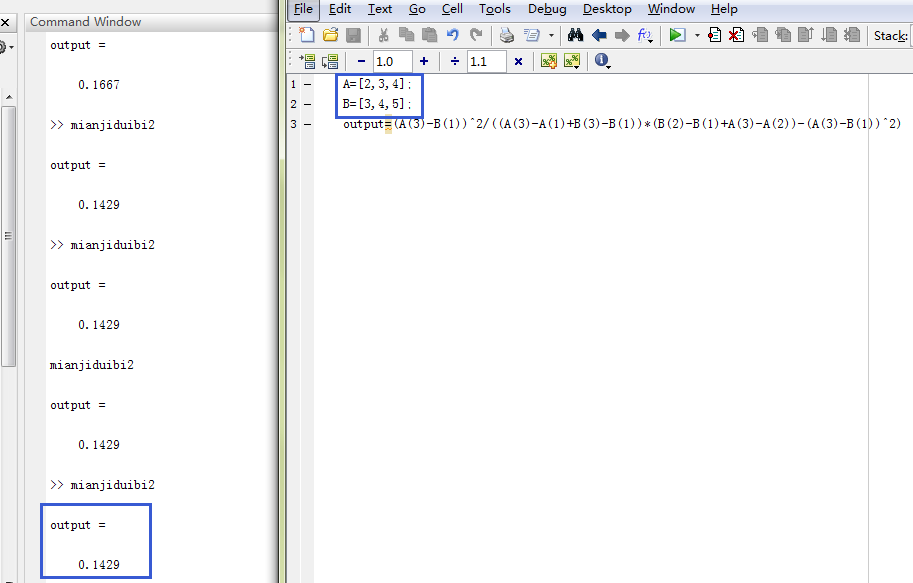

Supplement: f1 [file 4162539.f1.zip › Supplementary materials/2. SAM+FAHP/3-Similarity Aggregation Method (SAM)/2ú1⁄43ú1⁄44.png]

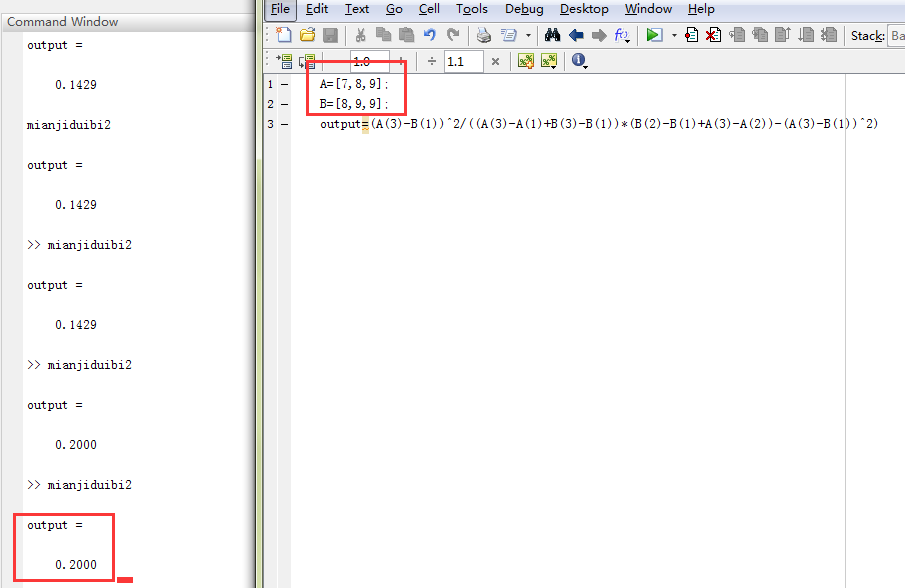

Supplement: f1 [file 4162539.f1.zip › Supplementary materials/2. SAM+FAHP/3-Similarity Aggregation Method (SAM)/8ú1⁄49ú1⁄49.png]

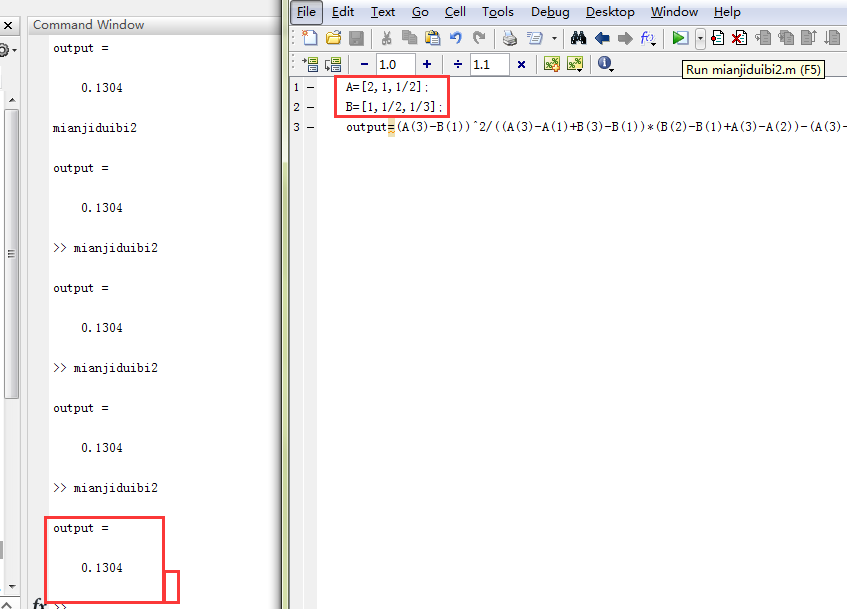

Supplement: f1 [file 4162539.f1.zip › Supplementary materials/2. SAM+FAHP/3-Similarity Aggregation Method (SAM)/The reciprocal of the fuzzy number 1.png]

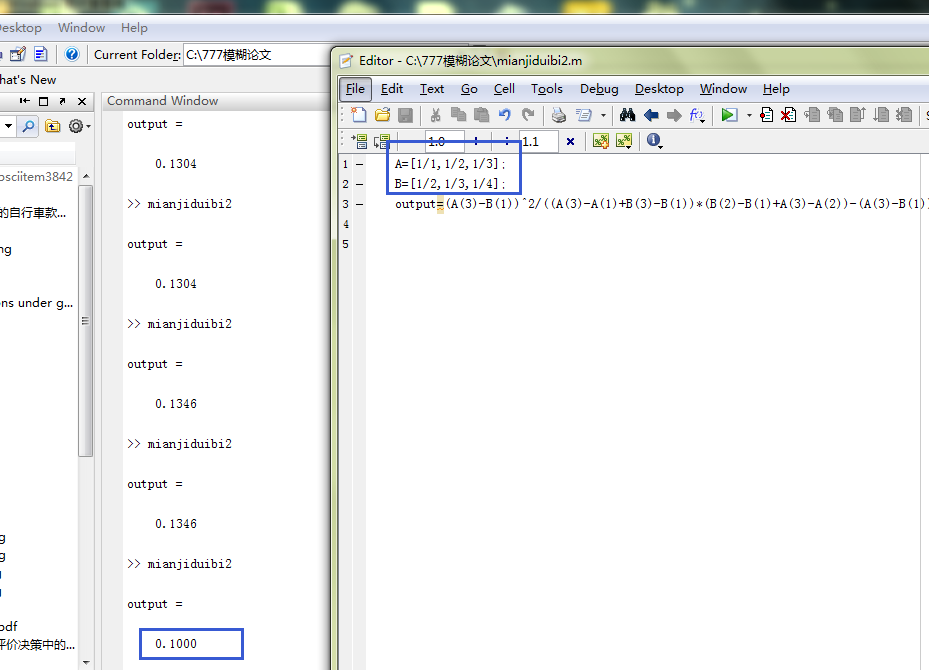

Supplement: f1 [file 4162539.f1.zip › Supplementary materials/2. SAM+FAHP/3-Similarity Aggregation Method (SAM)/The reciprocal of the fuzzy number 2.png]

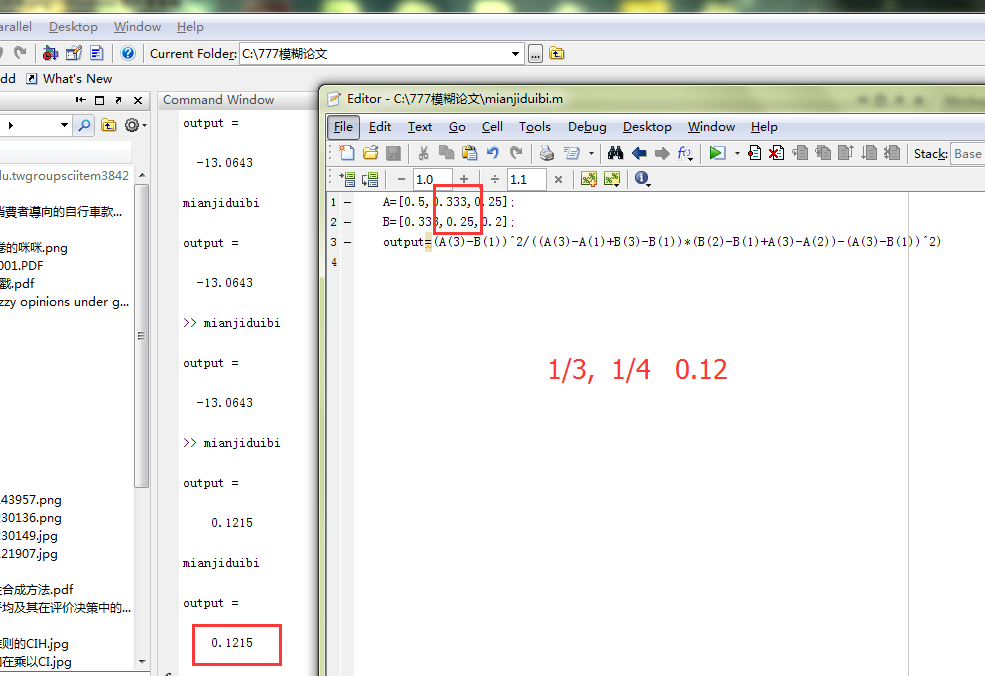

Supplement: f1 [file 4162539.f1.zip › Supplementary materials/2. SAM+FAHP/3-Similarity Aggregation Method (SAM)/The reciprocal of the fuzzy number 3.png]

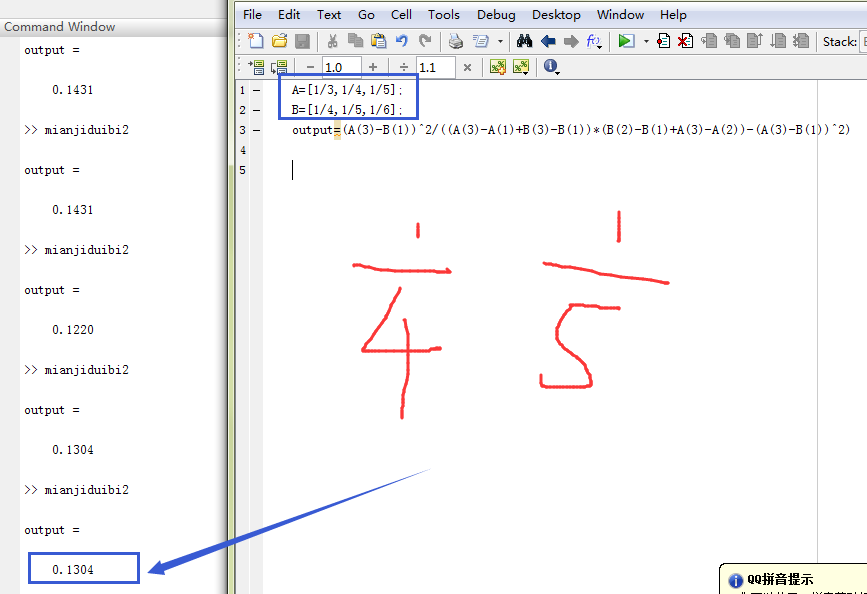

Supplement: f1 [file 4162539.f1.zip › Supplementary materials/2. SAM+FAHP/3-Similarity Aggregation Method (SAM)/The reciprocal of the fuzzy number 4.png]

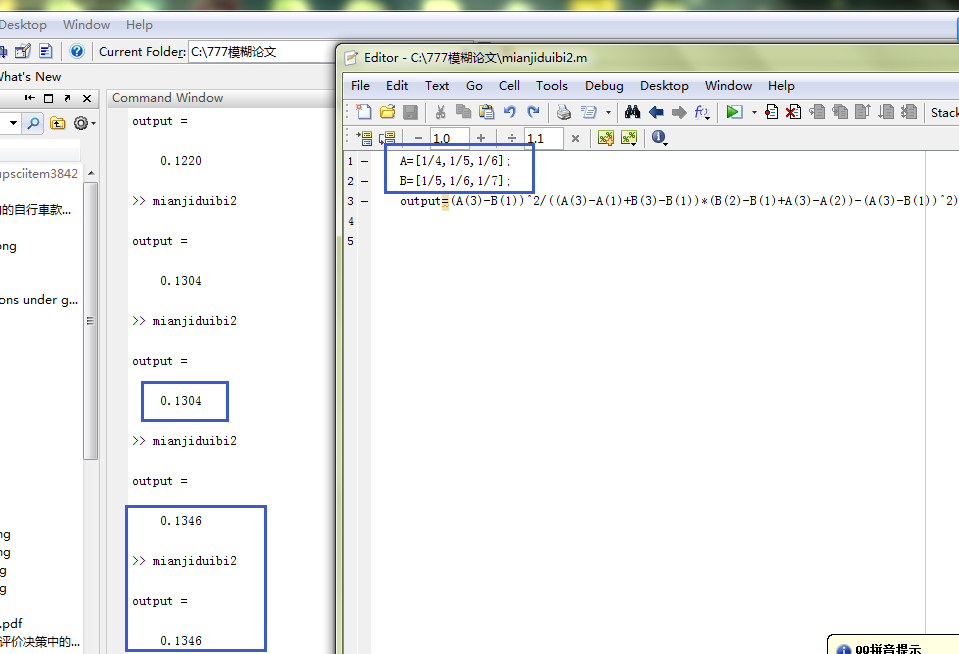

Supplement: f1 [file 4162539.f1.zip › Supplementary materials/2. SAM+FAHP/3-Similarity Aggregation Method (SAM)/The reciprocal of the fuzzy number 5.png]

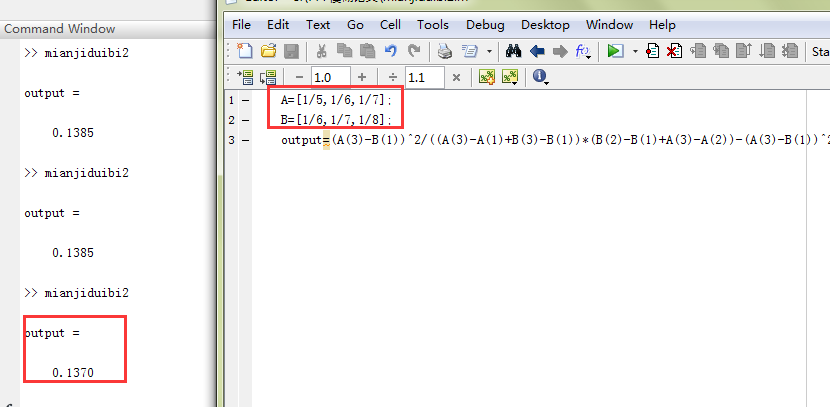

Supplement: f1 [file 4162539.f1.zip › Supplementary materials/2. SAM+FAHP/3-Similarity Aggregation Method (SAM)/The reciprocal of the fuzzy number 6.png]

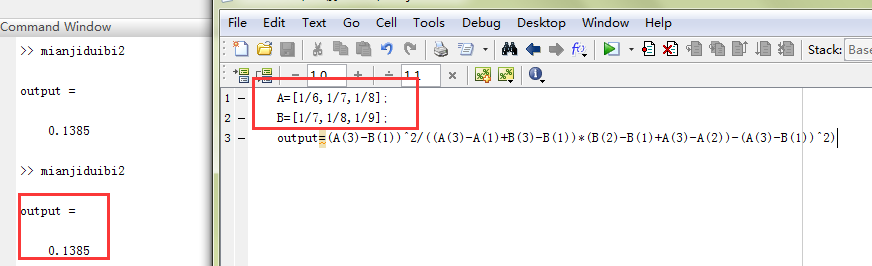

Supplement: f1 [file 4162539.f1.zip › Supplementary materials/2. SAM+FAHP/3-Similarity Aggregation Method (SAM)/The reciprocal of the fuzzy number 7.png]

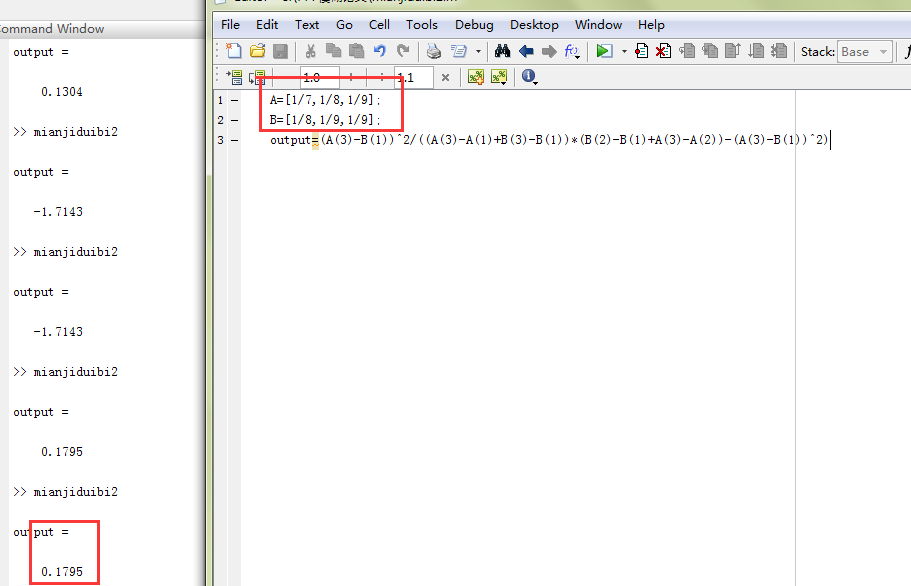

Supplement: f1 [file 4162539.f1.zip › Supplementary materials/2. SAM+FAHP/3-Similarity Aggregation Method (SAM)/The reciprocal of the fuzzy number 8.png]

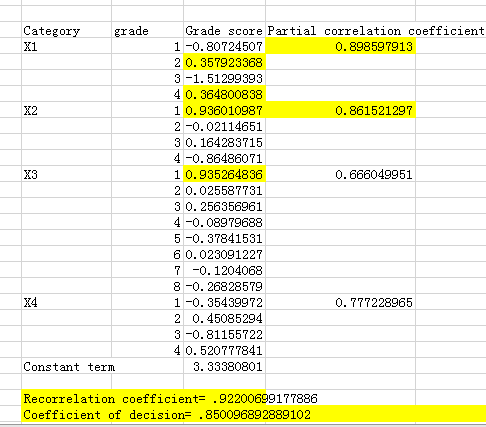

Supplement: f1 [file 4162539.f1.zip › Supplementary materials/3.QTT-I calculation/Simple and modern.png]
